# Supplementary material
Source: PubMed Central journal article supplement (PMC10073347)
Supplement: NIHMS1866642-supplement-Supplementary_Info.pdf [file NIHMS1866642-supplement-Supplementary_Info.pdf]

# Supplementary Information

## An NmrA-like enzyme-catalysed redox-mediated Diels-Alder cycloaddition with *anti*-selectivity

Zhiwen Liu<sup>1,11</sup>, Sebastian Rivera<sup>2,11</sup>, Sean A. Newmister<sup>2,11</sup>, Jacob N. Sanders<sup>3, 11</sup>, Qiuyue Nie<sup>1</sup>, Shuai Liu<sup>1</sup>, Fanglong Zhao<sup>1</sup>, Joseph D. Ferrara<sup>4</sup>, Hao-Wei Shih<sup>1</sup>, Siddhant Patil<sup>5</sup>, Weijun Xu<sup>5</sup>, Mitchell D. Miller<sup>5</sup>, George N. Phillips, Jr.<sup>5,6</sup>, K. N. Houk<sup>3\*</sup>, David H. Sherman<sup>2,7,8,9\*</sup> and Xue Gao<sup>1,6,10\*</sup>

<sup>1</sup>Department of Chemical and Biomolecular Engineering, Rice University, Houston, TX, USA.

<sup>2</sup>Life Sciences Institute, University of Michigan, Ann Arbor, MI, USA.

<sup>3</sup>Department of Chemistry and Biochemistry, University of California, Los Angeles, CA, USA.

<sup>4</sup>Rigaku Americas Corporation, 9009 New Trails Drive, The Woodlands, TX, USA.

<sup>5</sup>Department of Biosciences, Rice University, Houston, TX, USA.

<sup>6</sup>Department of Chemistry, Rice University, Houston, TX, USA.

<sup>7</sup>Department of Medicinal Chemistry, University of Michigan, Ann Arbor, MI, USA.

<sup>8</sup>Department of Microbiology & Immunology, University of Michigan, Ann Arbor, MI, USA.

<sup>9</sup>Department of Chemistry, University of Michigan, Ann Arbor, MI, USA.

<sup>10</sup>Department of Bioengineering, Rice University, Houston, TX, USA.

<sup>11</sup>These authors contributed equally.

\*Corresponding authors: [xue.gao@rice.edu](mailto:xue.gao@rice.edu); [davidhs@umich.edu](mailto:davidhs@umich.edu); [houk@chem.ucla.edu](mailto:houk@chem.ucla.edu)

# Table of Contents

|                                                                                                                                       |     |
|---------------------------------------------------------------------------------------------------------------------------------------|-----|
| <b>Supplementary Tables</b>                                                                                                           | S4  |
| <b>Supplementary Table 1</b> Strains and plasmids in this study.                                                                      | S4  |
| <b>Supplementary Table 2</b> Primers used in this study.                                                                              | S5  |
| <b>Supplementary Table 3</b> BLASTP CtdN homologs in NCBI databases.                                                                  | S6  |
| <b>Supplementary Table 4</b> BLASTP CtdP homologs in NCBI databases.                                                                  | S7  |
| <b>Supplementary Table 5</b> NMR Data of compound <b>3</b> ( $\delta$ in ppm, $J$ in Hz).                                             | S8  |
| <b>Supplementary Table 6</b> NMR Data of compound <b>5</b> ( $\delta$ in ppm, $J$ in Hz).                                             | S9  |
| <b>Supplementary Table 7</b> NMR Data of compound <b>6</b> ( $\delta$ in ppm, $J$ in Hz)                                              | S10 |
| <b>Supplementary Table 8</b> NMR Data of compound <b>7</b> ( $\delta$ in ppm, $J$ in Hz).                                             | S11 |
| <b>Supplementary Table 9</b> NMR Data of compound <b>10</b> ( $\delta$ in ppm, $J$ in Hz).                                            | S12 |
| <b>Supplementary Table 10</b> NMR Data of compound <b>R1</b> ( $\delta$ in ppm, $J$ in Hz).                                           | S13 |
| <b>Supplementary Table 11</b> Crystal data and structure refinement for compound <b>5</b> .                                           | S14 |
| <b>Supplementary Table 12</b> Crystal data and structure refinement for compound <b>10</b> .                                          | S15 |
| <b>Supplementary Table 13</b> Crystallographic data collection and structure refinement statistics.                                   | S16 |
| <b>Supplementary Table 14</b> Structural homologs of CtdP identified by DALI server.                                                  | S17 |
| <b>Supplementary Figures</b>                                                                                                          | S18 |
| <b>Supplementary Fig. 1</b> Biomimetic synthesis of the CtdP and MalC substrates.                                                     | S18 |
| <b>Supplementary Fig. 2</b> SDS-PAGE (12%) analysis of purified proteins.                                                             | S19 |
| <b>Supplementary Fig. 3</b> PCR confirmation of <i>ctd</i> mutants.                                                                   | S20 |
| <b>Supplementary Fig. 4</b> UV and mass spectra of compounds <b>1-6</b> .                                                             | S21 |
| <b>Supplementary Fig. 5</b> UV and mass spectra of compounds <b>7-11</b> .                                                            | S22 |
| <b>Supplementary Fig. 6</b> Electronic circular dichroism spectra of <b>2</b> , <b>5</b> , and <b>6</b> .                             | S23 |
| <b>Supplementary Fig. 7</b> Kinetic analysis of CtdP, NADP <sup>+</sup> content in the purified CtdP protein, and refold CtdP assays. | S24 |
| <b>Supplementary Fig. 8</b> The proposed pathways of spontaneous Diels-Alder reactions of compound <b>3</b> .                         | S25 |
| <b>Supplementary Fig. 9-1</b> <sup>1</sup> H NMR spectrum of <b>3</b> in DMSO- <i>d</i> <sub>6</sub> .                                | S26 |
| <b>Supplementary Fig. 9-2</b> <sup>13</sup> C NMR spectrum of <b>3</b> in DMSO- <i>d</i> <sub>6</sub> .                               | S27 |
| <b>Supplementary Fig. 9-3</b> DEPT135 and <sup>13</sup> C NMR spectra of <b>3</b> in DMSO- <i>d</i> <sub>6</sub> .                    | S28 |
| <b>Supplementary Fig. 9-4</b> <sup>1</sup> H- <sup>1</sup> H COSY NMR spectrum of <b>3</b> in DMSO- <i>d</i> <sub>6</sub> .           | S29 |
| <b>Supplementary Fig. 9-5</b> HSQC NMR spectrum of <b>3</b> in DMSO- <i>d</i> <sub>6</sub> .                                          | S30 |
| <b>Supplementary Fig. 9-6</b> HMBC NMR spectrum of <b>3</b> in DMSO- <i>d</i> <sub>6</sub> .                                          | S31 |
| <b>Supplementary Fig. 9-7</b> HRMS spectrum of <b>3</b> .                                                                             | S32 |
| <b>Supplementary Fig. 10-1</b> <sup>1</sup> H NMR spectrum of <b>5</b> in CDCl <sub>3</sub> .                                         | S33 |
| <b>Supplementary Fig. 10-2</b> <sup>13</sup> C NMR spectrum of <b>5</b> in CDCl <sub>3</sub> .                                        | S34 |
| <b>Supplementary Fig. 10-3</b> DEPT135 and <sup>13</sup> C NMR spectra of <b>5</b> in CDCl <sub>3</sub> .                             | S35 |
| <b>Supplementary Fig. 10-4</b> <sup>1</sup> H- <sup>1</sup> H COSY NMR spectrum of <b>5</b> in CDCl <sub>3</sub> .                    | S36 |
| <b>Supplementary Fig. 10-5</b> HSQC NMR spectrum of <b>5</b> in CDCl <sub>3</sub> .                                                   | S37 |
| <b>Supplementary Fig. 10-6</b> HMBC NMR spectrum of <b>5</b> in CDCl <sub>3</sub> .                                                   | S38 |
| <b>Supplementary Fig. 10-7</b> NOESY NMR spectrum of <b>5</b> in CDCl <sub>3</sub> .                                                  | S39 |
| <b>Supplementary Fig. 10-8</b> HRMS spectrum of <b>5</b> .                                                                            | S40 |
| <b>Supplementary Fig. 11-1</b> <sup>1</sup> H NMR spectrum of <b>6</b> in CD <sub>3</sub> CN.                                         | S41 |
| <b>Supplementary Fig. 11-2</b> <sup>13</sup> C NMR spectrum of <b>6</b> in CD <sub>3</sub> CN.                                        | S42 |
| <b>Supplementary Fig. 11-3</b> DEPT135 and <sup>13</sup> C NMR spectra of <b>6</b> in CD <sub>3</sub> CN.                             | S43 |
| <b>Supplementary Fig. 11-4</b> <sup>1</sup> H- <sup>1</sup> H COSY NMR spectrum of <b>6</b> in CD <sub>3</sub> CN.                    | S44 |
| <b>Supplementary Fig. 11-5</b> HSQC NMR spectrum of <b>6</b> in CD <sub>3</sub> CN.                                                   | S45 |
| <b>Supplementary Fig. 11-6</b> HMBC NMR spectrum of <b>6</b> in CD <sub>3</sub> CN.                                                   | S46 |

|                                                                                                                               |      |
|-------------------------------------------------------------------------------------------------------------------------------|------|
| <b>Supplementary Fig. 11-7</b> NOESY NMR spectrum of <b>6</b> in CD <sub>3</sub> CN.                                          | S47  |
| <b>Supplementary Fig. 11-8</b> HRMS spectrum of <b>6</b> .                                                                    | S48  |
| <b>Supplementary Fig. 12-1</b> <sup>1</sup> H NMR spectrum of <b>7</b> in DMSO- <i>d</i> <sub>6</sub> .                       | S49  |
| <b>Supplementary Fig. 12-2</b> <sup>13</sup> C NMR spectrum of <b>7</b> in DMSO- <i>d</i> <sub>6</sub> .                      | S50  |
| <b>Supplementary Fig. 12-3</b> DEPT135 and <sup>13</sup> C NMR spectra of <b>7</b> in DMSO- <i>d</i> <sub>6</sub> .           | S51  |
| <b>Supplementary Fig. 12-4</b> <sup>1</sup> H- <sup>1</sup> H COSY NMR spectrum of <b>7</b> in DMSO- <i>d</i> <sub>6</sub> .  | S52  |
| <b>Supplementary Fig. 12-5</b> HSQC NMR spectrum of <b>7</b> in DMSO- <i>d</i> <sub>6</sub> .                                 | S53  |
| <b>Supplementary Fig. 12-6</b> HMBC NMR spectrum of <b>7</b> in DMSO- <i>d</i> <sub>6</sub> .                                 | S54  |
| <b>Supplementary Fig. 12-7</b> HRMS spectrum of <b>7</b> .                                                                    | S55  |
| <b>Supplementary Fig. 13-1</b> <sup>1</sup> H NMR spectrum of <b>9</b> in DMSO- <i>d</i> <sub>6</sub> .                       | S56  |
| <b>Supplementary Fig. 13-2</b> <sup>13</sup> C NMR spectrum of <b>9</b> in DMSO- <i>d</i> <sub>6</sub> .                      | S57  |
| <b>Supplementary Fig. 14-1</b> <sup>1</sup> H NMR spectrum of <b>10</b> in CD <sub>3</sub> CN.                                | S58  |
| <b>Supplementary Fig. 14-2</b> <sup>13</sup> C NMR spectrum of <b>10</b> in CD <sub>3</sub> CN.                               | S59  |
| <b>Supplementary Fig. 14-3</b> DEPT135 and <sup>13</sup> C NMR spectra of <b>10</b> in CD <sub>3</sub> CN.                    | S60  |
| <b>Supplementary Fig. 14-4</b> <sup>1</sup> H- <sup>1</sup> H COSY NMR spectrum of <b>10</b> in CD <sub>3</sub> CN.           | S61  |
| <b>Supplementary Fig. 14-5</b> HSQC NMR spectrum of <b>10</b> in CD <sub>3</sub> CN.                                          | S62  |
| <b>Supplementary Fig. 14-6</b> HMBC NMR spectrum of <b>10</b> in CD <sub>3</sub> CN.                                          | S63  |
| <b>Supplementary Fig. 14-7</b> NOESY NMR spectrum of <b>10</b> in CD <sub>3</sub> CN.                                         | S64  |
| <b>Supplementary Fig. 14-8</b> HRMS spectrum of <b>10</b> .                                                                   | S65  |
| <b>Supplementary Fig. 15-1</b> <sup>1</sup> H NMR spectrum of <b>11</b> in CD <sub>3</sub> OD/CDCl <sub>3</sub> (10/1).       | S66  |
| <b>Supplementary Fig. 15-2</b> <sup>13</sup> C NMR spectrum of <b>11</b> in CD <sub>3</sub> OD/CDCl <sub>3</sub> (10/1).      | S67  |
| <b>Supplementary Fig. 16-1</b> <sup>1</sup> H NMR spectrum of <b>S7</b> in DMSO- <i>d</i> <sub>6</sub> .                      | S68  |
| <b>Supplementary Fig. 16-2</b> <sup>13</sup> C NMR spectrum of <b>S7</b> in DMSO- <i>d</i> <sub>6</sub> .                     | S69  |
| <b>Supplementary Fig. 16-3</b> DEPT135 and <sup>13</sup> C NMR spectra of <b>S7</b> in DMSO- <i>d</i> <sub>6</sub> .          | S70  |
| <b>Supplementary Fig. 16-4</b> <sup>1</sup> H- <sup>1</sup> H COSY NMR spectrum of <b>S7</b> in DMSO- <i>d</i> <sub>6</sub> . | S71  |
| <b>Supplementary Fig. 16-5</b> HSQC NMR spectrum of <b>S7</b> in DMSO- <i>d</i> <sub>6</sub> .                                | S72  |
| <b>Supplementary Fig. 16-6</b> HMBC NMR spectrum of <b>S7</b> in DMSO- <i>d</i> <sub>6</sub> .                                | S73  |
| <b>Supplementary Fig. 17-1</b> <sup>1</sup> H NMR spectrum of <b>R1</b> in CDCl <sub>3</sub> .                                | S74  |
| <b>Supplementary Fig. 17-2</b> <sup>13</sup> C NMR spectrum of <b>R1</b> in CDCl <sub>3</sub> .                               | S75  |
| <b>Supplementary Fig. 17-3</b> DEPT135 and <sup>13</sup> C NMR spectra of <b>R1</b> in CDCl <sub>3</sub> .                    | S76  |
| <b>Supplementary Fig. 17-4</b> <sup>1</sup> H- <sup>1</sup> H COSY NMR spectrum of <b>R1</b> in CDCl <sub>3</sub> .           | S77  |
| <b>Supplementary Fig. 17-5</b> HSQC-TOCSY NMR spectrum of <b>R1</b> in CDCl <sub>3</sub> .                                    | S78  |
| <b>Supplementary Fig. 17-6</b> HMBC NMR spectrum of <b>R1</b> in CDCl <sub>3</sub> .                                          | S79  |
| <b>Supplementary Fig. 17-7</b> NOESY NMR spectrum of <b>R1</b> in CDCl <sub>3</sub> .                                         | S80  |
| <b>Supplementary Fig. 17-8</b> HRMS spectrum of <b>R1</b> .                                                                   | S81  |
| <b>Energies and molecular coordinates of calculated structures</b>                                                            | S82  |
| <b>Supplementary References</b>                                                                                               | S102 |

## Supplementary Tables

Supplementary Table 1 | Strains and plasmids in this study.

| Strain or plasmid                         | Characteristics                                                                            | Source     |
|-------------------------------------------|--------------------------------------------------------------------------------------------|------------|
| <b>Strains</b>                            |                                                                                            |            |
| <i>E.coli</i> TOP 10                      | General cloning host strain                                                                | Invitrogen |
| <i>E.coli</i> BL21 (DE3)                  | Protein production host strain                                                             | StrataGene |
| <i>Penicillin citrinum</i> ATCC 9849      | Wild-type <i>P. citrinum</i> used in this study                                            | ATCC       |
| $\Delta$ <i>ctdP</i>                      | The <i>ctdP</i> knockout mutant of <i>P. citrinum</i> ATCC 9849                            | This study |
| $\Delta$ <i>ctdR</i>                      | The <i>ctdR</i> knockout mutant of <i>P. citrinum</i> ATCC 9849                            | This study |
| $\Delta$ <i>ctdO</i>                      | The <i>ctdO</i> knockout mutant of <i>P. citrinum</i> ATCC 9849                            | This study |
| $\Delta$ <i>ctdN</i>                      | The <i>ctdN</i> knockout mutant of <i>P. citrinum</i> ATCC 9849                            | This study |
| <b>Plasmids</b>                           |                                                                                            |            |
| Modified pETDuet-1                        | Amp <sup>r</sup> , vector for protein expression                                           | This study |
| pUC57                                     | Amp <sup>r</sup> , vector for gene cloning                                                 | Addgene    |
| <i>ctdP-KO-P</i>                          | Amp <sup>r</sup> , gene knockout plasmid used for $\Delta$ <i>ctdP</i> mutant construction | This study |
| <i>ctdR-KO-P</i>                          | Amp <sup>r</sup> , gene knockout plasmid used for $\Delta$ <i>ctdR</i> mutant construction | This study |
| <i>ctdO-KO-P</i>                          | Amp <sup>r</sup> , gene knockout plasmid used for $\Delta$ <i>ctdO</i> mutant construction | This study |
| pET- <i>ctdR</i>                          | Amp <sup>r</sup> , vector for CtdR expression                                              | This study |
| pET- <i>ctdO</i>                          | Amp <sup>r</sup> , vector for CtdO expression                                              | This study |
| pET- <i>malC</i>                          | Amp <sup>r</sup> , vector for MalC expression                                              | This study |
| pET- <i>ctdP</i>                          | Amp <sup>r</sup> , vector for CtdP expression                                              | This study |
| pET- <i>ctdP</i> (Q118A)                  | Amp <sup>r</sup> , vector for CtdP (Q118A) expression                                      | This study |
| pET- <i>ctdP</i> (V133A)                  | Amp <sup>r</sup> , vector for CtdP (V133A) expression                                      | This study |
| pET- <i>ctdP</i> (L134A)                  | Amp <sup>r</sup> , vector for CtdP (L134A) expression                                      | This study |
| pET- <i>ctdP</i> (W160A)                  | Amp <sup>r</sup> , vector for CtdP (W160A) expression                                      | This study |
| pET- <i>ctdP</i> (Y161A)                  | Amp <sup>r</sup> , vector for CtdP (Y161A) expression                                      | This study |
| pET- <i>ctdP</i> (N164A)                  | Amp <sup>r</sup> , vector for CtdP (N164A) expression                                      | This study |
| pET- <i>ctdP</i> (F170A)                  | Amp <sup>r</sup> , vector for CtdP (F170A) expression                                      | This study |
| pET- <i>ctdP</i> (E173A)                  | Amp <sup>r</sup> , vector for CtdP (E173A) expression                                      | This study |
| pET- <i>ctdP</i> (S273A)                  | Amp <sup>r</sup> , vector for CtdP (S273A) expression                                      | This study |
| pET- <i>ctdP</i> (F277A)                  | Amp <sup>r</sup> , vector for CtdP (F277A) expression                                      | This study |
| pET- <i>ctdP</i> (Y269A)                  | Amp <sup>r</sup> , vector for CtdP (Y269A) expression                                      | This study |
| pET- <i>ctdP</i> (Y280A)                  | Amp <sup>r</sup> , vector for CtdP (Y280A) expression                                      | This study |
| pET- <i>ctdP</i> (Y280F)                  | Amp <sup>r</sup> , vector for CtdP (Y280F) expression                                      | This study |
| pET- <i>ctdP</i> (S340A)                  | Amp <sup>r</sup> , vector for CtdP (S340A) expression                                      | This study |
| pET- <i>ctdP</i> (P342A)                  | Amp <sup>r</sup> , vector for CtdP (P342A) expression                                      | This study |
| pET-SUMO- <i>ctdP</i> ( $\Delta$ 330-367) | Amp <sup>r</sup> , vector for SUMO-CtdP ( $\Delta$ 330-367) expression                     | This study |
| pET-SUMO- <i>ctdP</i> ( $\Delta$ 335-367) | Amp <sup>r</sup> , vector for SUMO-CtdP ( $\Delta$ 335-367) expression                     | This study |
| pET-SUMO- <i>ctdP</i> ( $\Delta$ 342-367) | Amp <sup>r</sup> , vector for SUMO-CtdP ( $\Delta$ 342-367) expression                     | This study |
| pET-SUMO- <i>ctdP</i> ( $\Delta$ 345-367) | Amp <sup>r</sup> , vector for SUMO-CtdP ( $\Delta$ 345-367) expression                     | This study |
| pET- <i>BmGDH</i>                         | Amp <sup>r</sup> , vector for BmGDH expression                                             | This study |

**Supplementary Table 2 | Primers used in this study.**

| Primer                      | Sequence (5'-3')                                           | Description                                                      |
|-----------------------------|------------------------------------------------------------|------------------------------------------------------------------|
| <i>bar-R</i>                | TCATCGCAAGACCGCAACAGGATTCATC                               | For colony PCR verification                                      |
| <i>bar-F</i>                | CATACCTTCTTAAGTTCGCCCTTCCTCCCT                             | mutant                                                           |
| <i>ctdP-up-F</i>            | ATGGCGGGTTCCTTTTACTTAAGAGTCCG                              | For colony PCR verification of $\Delta$ <i>ctdP</i>              |
| <i>ctdP-dn-R</i>            | AGTCTGTCCGTTTGAGACTGGGAGCAGATG                             |                                                                  |
| <i>ctdO-up-F</i>            | GGGGGAAAACCTGCGGAGCTTTTCAAGACTG                            | For colony PCR verification of $\Delta$ <i>ctdO</i>              |
| <i>ctdO-dn-R</i>            | GTGACTCCTGGAGGTAAGGACGGTCCGCGAG                            |                                                                  |
| <i>ctdR-up-F</i>            | CTGATGTTGATTAGACCCAGCCTGGAGGTC                             | For colony PCR verification of $\Delta$ <i>ctdR</i>              |
| <i>ctdR-dn-R</i>            | CCAGGGTACCGTTCAGGGCATTCCAATCCG                             |                                                                  |
| <i>ctdN-up-F</i>            | TACATGGGGATCACCAGGAG                                       | For colony PCR verification of $\Delta$ <i>ctdN</i>              |
| <i>ctdN-dn-R</i>            | CAACGAACTGTAATGGAGCG                                       |                                                                  |
| <i>ctdN-Exp-F</i>           | CTTTAAGAAGGAGATATACCATGACCCAGGGTGTAAAGAAA                  | Plasmid construction for CtdN expression                         |
| <i>ctdN-Exp-R</i>           | TTAGTGATGGTGGTGGTGTAGTCAAAAAGGAACCCGCCATT                  |                                                                  |
| <i>ctdP-Exp-F</i>           | CTTTAAGAAGGAGATATACCATGACACACGAGATTAACAAAC                 | Plasmid construction for CtdP expression                         |
| <i>ctdP-Exp-R</i>           | TTAGTGATGGTGGTGGTGTAGTTCACCAGGATCTTCTCTGAC                 |                                                                  |
| <i>ctdO-Exp-F</i>           | CTTTAAGAAGGAGATATACCATGACAAATCCAACAAAAATC                  | Plasmid construction for CtdO expression                         |
| <i>ctdO-Exp-R</i>           | TTAGTGATGGTGGTGGTGTAGTGTGTCAAGTTACCCTTA                    |                                                                  |
| <i>ctdR-Exp-F</i>           | CTTTAAGAAGGAGATATACCATGACTGTTGAAAGAAAGATTG                 | Plasmid construction for CtdR expression                         |
| <i>ctdR-Exp-R</i>           | TAGTGATGGTGGTGGTGTAGGGAAGCATTGAGACCGCTTAAAA                |                                                                  |
| <i>ctdP(Q118A)-Exp-F</i>    | TCCGATGCGCTGTCTGGCGGCAAAATTAACACCCAGTTCTG                  | Plasmid construction for CtdP (Q118A) expression                 |
| <i>ctdP(Q118A)-Exp-R</i>    | GCCGCCAGACACGCGCATGCGGATGAGGGTCCGAGCTGAACACGAC             |                                                                  |
| <i>ctdP(V133A)-Exp-F</i>    | GTGAAAAGCCTGGGGCGAGTCTTGGGGACGAGCTTGTCCACACA               | Plasmid construction for CtdP (V133A) expression                 |
| <i>ctdP(V133A)-Exp-R</i>    | AGACTCGCCCCAGGCTTTCACGTCCAGTGTGGGGTGTAAATTT                |                                                                  |
| <i>ctdP(L134A)-Exp-F</i>    | GTGAAAAGCCTGGGGCGAGTCTTGGGGACGAGCTTGTCCACACA               | Plasmid construction for CtdP (L134A) expression                 |
| <i>ctdP(L134A)-Exp-R</i>    | AGACTCGCCCCAGGCTTTCACGTCTGCAACTGGGGTGTAAATTT               |                                                                  |
| <i>ctdP(W160A)-Exp-F</i>    | TACTTCCAGAACTTTTTTTCATTCCATCTTTCGTGGCCGAGTTTGGTGGC         | Plasmid construction for CtdP (W160A) expression                 |
| <i>ctdP(W160A)-Exp-R</i>    | AATGAAAAAGTCTGGAAGTATGCCGATGCCATGATCGGCGTGAAGCT            |                                                                  |
| <i>ctdP(Y161A)-Exp-F</i>    | TTCCAGAACTTTTTTTCATTCCATCTTTCGTGGCCGAGTTTGGTGGCTTT         | Plasmid construction for CtdP (Y161A) expression                 |
| <i>ctdP(Y161A)-Exp-R</i>    | AATGAAAAAGTCTGGAATGCCACGATGCCATGATCGGCGTGAAGCT             |                                                                  |
| <i>ctdP(N164A)-Exp-F</i>    | ATTCCATCTTTCGTGGCCGAGTTTGGTGGCTTTCCG                       | Plasmid construction for CtdP (N164A) expression                 |
| <i>ctdP(N164A)-Exp-R</i>    | CTCGGCCACGAAAGATGGAATGAAAAATGCCCTGGAAGTACCACGA             |                                                                  |
| <i>ctdP(F170A)-Exp-F</i>    | GAGTTTGGTGGCTTTCGGTGAATCAAGACGATGAA                        | Plasmid construction for CtdP (F170A) expression                 |
| <i>ctdP(F170A)-Exp-R</i>    | CCACGAAAGCCACCAAACCTCGGCCACTGCAGATGGAATGAAAAA              |                                                                  |
| <i>ctdP(E173A)-Exp-F</i>    | GGCTTTCGGTGAATCAAGACGATGAAAGTTATCTGACTTTGCGT               | Plasmid construction for CtdP (E173A) expression                 |
| <i>ctdP(E173A)-Exp-R</i>    | ATCGTCTTGATTCACGGAAGCCACAAATGCGGCCACGAAAAGATGG             |                                                                  |
| <i>ctdP(E173A)-Exp-F</i>    | GGCTTTCGGTGAATCAAGACGATGAAAGTTATCTGACTTTGCGT               | Plasmid construction for CtdP (E173A) expression                 |
| <i>ctdP(F174A)-Exp-R</i>    | GTCTTGATTCCACGGAAGCCACTGCTCGGCCACGAAAAGATGGAAT             |                                                                  |
| <i>ctdP(S273A)-Exp-F</i>    | TTCGCGTTCTATCAAATGCGTGATGGCGAACTCTTC                       | Plasmid construction for CtdP (S273A) expression                 |
| <i>ctdP(S273A)-Exp-R</i>    | ACGCATTTGATAGAACGCGAATACCTGACGTGCCTCTGGAGGTA               |                                                                  |
| <i>ctdP(F277A)-Exp-F</i>    | GCGTTCTATCAAATGCGTGATGGCGAACTC                             | Plasmid construction for CtdP (F277A) expression                 |
| <i>ctdP(F277A)-Exp-R</i>    | ATCACGATTTGATAGAACGCTGTCTACTGACGTGACTCCTGGAGGTA            |                                                                  |
| <i>ctdP(Y269A)-Exp-F</i>    | CTCCAGGATCACGTACAGTATTCGCGTTCTATCAAATGCGTGAT               | Plasmid construction for CtdP (Y269A) expression                 |
| <i>ctdP(Y269A)-Exp-R</i>    | GAATACCTGACGTGACTCCTGGAGTGCAGGACGGTCCGACGGCATATC           |                                                                  |
| <i>ctdP(P280A)-Exp-F</i>    | CGTGATGGCGAACTTTCGGTAATGGAATTACGGAATAAAGA                  | Plasmid construction for CtdP (Y280A and Y280F) expression       |
| <i>ctdP(P280A)-Exp-R</i>    | CCGAAAGAGTTCGCCATCACGCATTTGTGCGAACGCGAATACC                |                                                                  |
| <i>ctdP(P280F)-Exp-R</i>    | ACCGAAGAGTTCGCCATCACGCATTTGGAAGAACGCGAATAC                 |                                                                  |
| <i>ctdP(S340A)-Exp-F</i>    | ATCGTCAAGAGAAGATCCTGGTGAACATCACACCACCATCAC                 | Plasmid construction for CtdP (S340A) expression                 |
| <i>ctdP(S340A)-Exp-R</i>    | ACCAGGATCTTCTGACGATGGGACCTGCTCTCTCGATCTT                   |                                                                  |
| <i>ctdP(P342A)-Exp-F</i>    | GAAGATCCTGGTGAACATCACACCACCATCACTAATGA                     | Plasmid construction for CtdP (P342A) expression                 |
| <i>ctdP(P342A)-Exp-R</i>    | TTCACCAGGATCTTCTGACGATGGACCCGATCTCTCGATCTT                 |                                                                  |
| <i>ctdP(A330-367)-Exp-F</i> | GAGGCTCACAGAGAACAGATTTGGTGGATCCACACAGATTAACAACTCTCC        | Plasmid construction for Sumo-CtdP( $\Delta$ 330-367)-expression |
| <i>ctdP(A330-367)-Exp-R</i> | CTCAGCTTCTTTCGGGCCCTCGAGTGGCGCCGCTTATGCCCGGCAATGCCTTTCGAAC |                                                                  |
| <i>ctdP(A335-367)-Exp-R</i> | AACTCAGCTTCTTTCGGGCCCTCGAGTGGCGCCGCTTAGGAAGTTTGTGTTGCCCGGC | Plasmid construction for Sumo-CtdP( $\Delta$ 335-367)-expression |
| <i>ctdP(A342-367)-Exp-R</i> | CTCAGCTTCTTTCGGGCCCTCGAGTGGCGCCGCTTAACCCGATCTCTCGATCTTCTCG | Plasmid construction for Sumo-CtdP( $\Delta$ 342-367)-expression |
| <i>ctdP(A348-367)-Exp-R</i> | ACTCAGCTTCTTTCGGGCCCTCGAGTGGCGCCGCTTAATCTTCTGACGATGGGACC   | Plasmid construction for Sumo-CtdP( $\Delta$ 348-367)-expression |
| <i>BmGDH-Exp-F</i>          | CTTTAAGAAGGAGATATACCATGTATAAAGATTTAGAAGGAA                 | Plasmid construction for BmGDH expression                        |
| <i>BmGDH-Exp-R</i>          | TTAGTGATGGTGGTGGTGTATCTCCGCGTCTGCTTGGAAATGA                |                                                                  |
| <i>pET-Exp-F</i>            | CATCACCACCACCATCACTAATGATAATTTGAACGCCAGCACA                | Plasmid construction for proteins expression                     |
| <i>pET-Exp-R</i>            | GGTATATCTCCTTCTTAAAGTTAAACAAAATTTTCTAGAGGGG                |                                                                  |

**Supplementary Table 3 | BLASTP CtdN homologs in NCBI databases.**

| Description                                                                                            | Max Score | Total Score | Query Cover | E value            | Per. Ident | Accession    |
|--------------------------------------------------------------------------------------------------------|-----------|-------------|-------------|--------------------|------------|--------------|
| Short-chain dehydrogenase/reductase <b>PhqE</b> [ <i>Penicillium fellutanum</i> ]                      | 296       | 296         | 99%         | 2e <sup>-100</sup> | 50.57%     | L0E2Z4.1     |
| Short-chain dehydrogenase/reductase <b>MalC</b> [ <i>Malbranchea aurantiaca</i> ]                      | 251       | 251         | 97%         | 1e <sup>-82</sup>  | 45.77%     | L0E4F8.1     |
| Short-chain dehydrogenase/reductase <b>ATR9</b> [ <i>Stachybotrys chlorohalonata</i> IBT 40285]        | 169       | 169         | 95%         | 9e <sup>-51</sup>  | 37.89%     | A0A084R1K2.1 |
| Short-chain dehydrogenase/reductase <b>UcsE</b> [ <i>Acremonium</i> sp.]                               | 142       | 142         | 95%         | 7e <sup>-40</sup>  | 30.08%     | A0A411KUU9.1 |
| Short-chain dehydrogenase/reductase <b>Fsr5</b> [ <i>Fusarium fujikuroi</i> IMI 58289]                 | 127       | 127         | 97%         | 3e <sup>-34</sup>  | 31.82%     | S0DRI2.1     |
| Uncharacterized oxidoreductase <b>YkvO</b> [ <i>Bacillus subtilis</i> subsp. <i>subtilis</i> str. 168] | 87.8      | 87.8        | 95%         | 2e <sup>-19</sup>  | 27.03%     | O31680.1     |
| 3alpha-hydroxysteroid dehydrogenase [ <i>Ruminococcus gnavus</i> ATCC 29149]                           | 67.8      | 67.8        | 94%         | 4e <sup>-12</sup>  | 25.77%     | A7B3K3.1     |
| Tropinone reductase homolog <b>P29X</b> [ <i>Datura stramonium</i> ]                                   | 67.4      | 67.4        | 97%         | 5e <sup>-12</sup>  | 26.60%     | P50165.1     |
| Dihydroantipyrin 7-dehydrogenase <b>BacC</b> [ <i>Bacillus subtilis</i> ]                              | 65.5      | 65.5        | 94%         | 2e <sup>-11</sup>  | 26.54%     | Q8KWT4.1     |
| Tropinone reductase <b>TR-II</b> [ <i>Hyoscyamus niger</i> ]                                           | 64.7      | 64.7        | 95%         | 5e <sup>-11</sup>  | 25.77%     | P50164.1     |
| Noroxomaritidine/norcrasgoline reductase <b>NorRed</b> [ <i>Narcissus pseudonarcissus</i> ]            | 64.3      | 64.3        | 94%         | 6e <sup>-11</sup>  | 27.84%     | A0A1A9TAK5.1 |
| Tropinone reductase <b>TR-I</b> [ <i>Datura stramonium</i> ]                                           | 63.2      | 63.2        | 94%         | 2e <sup>-10</sup>  | 25.95%     | P50162.1     |
| 3alpha-hydroxy bile acid-CoA-ester 3-dehydrogenase 1/3 [ <i>Clostridium scindens</i> ]                 | 62.4      | 62.4        | 95%         | 2e <sup>-10</sup>  | 25.97%     | P07914.3     |
| Peroxisomal trans-2-enoyl-CoA reductase [ <i>Cavia porcellus</i> ]                                     | 40.4      | 40.4        | 25%         | 0.010              | 33.80%     | Q9JIF5.1     |
| Peroxisomal trans-2-enoyl-CoA reductase [ <i>Pongo abelii</i> ]                                        | 39.7      | 39.7        | 29%         | 0.017              | 29.76%     | Q5RCH8       |

**Supplementary Table 4 | BLASTP CtdP homologs in NCBI databases.**

| Description                                                                                         | Max Score | Total Score | Query Cover | E value           | Per. Ident | Accession    |
|-----------------------------------------------------------------------------------------------------|-----------|-------------|-------------|-------------------|------------|--------------|
| NmrA-like family domain-containing oxidoreductase <b>HimF</b> [ <i>Aspergillus japonicus</i> ]      | 266       | 266         | 85%         | 3e <sup>-86</sup> | 45.62%     | A0A2Z5TWF0.1 |
| NmrA-like family domain-containing oxidoreductase <b>LnaB</b> [ <i>Aspergillus flavus</i> NRRL3357] | 245       | 245         | 85%         | 1e <sup>-77</sup> | 41.69%     | B8NU00.1     |
| NmrA-like family domain-containing oxidoreductase <b>PtmS</b> [ <i>Penicillium simplicissimum</i> ] | 207       | 207         | 88%         | 5e <sup>-63</sup> | 35.87%     | A0A140JWT5.1 |
| NmrA-like family domain-containing oxidoreductase <b>PhqG</b> [ <i>Penicillium fellutanum</i> ]     | 200       | 200         | 85%         | 2e <sup>-60</sup> | 38.56%     | L0E2U6.1     |
| NmrA-like family domain-containing oxidoreductase <b>NotA'</b> [ <i>Aspergillus versicolor</i> ]    | 195       | 195         | 87%         | 3e <sup>-58</sup> | 34.97%     | L7WRQ4.1     |
| NmrA-like family domain-containing protein <b>DDB_G0286605</b> [ <i>Dictyostelium discoideum</i> ]  | 104       | 104         | 74%         | 2e <sup>-24</sup> | 29.02%     | Q54LJ8.1     |
| NmrA-like family domain-containing protein 1 [ <i>Bos taurus</i> ]                                  | 82.0      | 82.0        | 74%         | 2e <sup>-16</sup> | 27.30%     | Q0VCN1.1     |
| NmrA-like family domain-containing protein 1 [ <i>Gallus gallus</i> ]                               | 81.3      | 81.3        | 67%         | 4e <sup>-16</sup> | 26.88%     | Q5ZID0.1     |
| NmrA-like family domain-containing protein 1 [ <i>Mus musculus</i> ]                                | 80.5      | 80.5        | 45%         | 8e <sup>-16</sup> | 31.64%     | Q8K2T1.1     |
| NmrA-like family domain-containing protein 1 [ <i>Homo sapiens</i> ]                                | 78.6      | 78.6        | 42%         | 3e <sup>-15</sup> | 33.33%     | Q9HBL8.1     |
| NmrA-like family domain-containing protein 1 [ <i>Rattus norvegicus</i> ]                           | 40.0      | 40.0        | 13%         | 0.007             | 42.31%     | P86172.1     |
| <b>CtdP aligned sequence with MalC and PhqE</b>                                                     |           |             |             |                   |            |              |
| Short-chain dehydrogenase/reductase <b>MalC</b> [ <i>Malbranchea aurantiaca</i> ]                   | 24.6      | 41.2        | 30%         | 0.004             | 30.00%     | L0E4F8.1     |
| Short-chain dehydrogenase/reductase <b>PhqE</b> [ <i>Penicillium fellutanum</i> ]                   | 16.2      | 16.2        | 6%          | 2.0               | 20.83%     | L0E2Z4.1     |

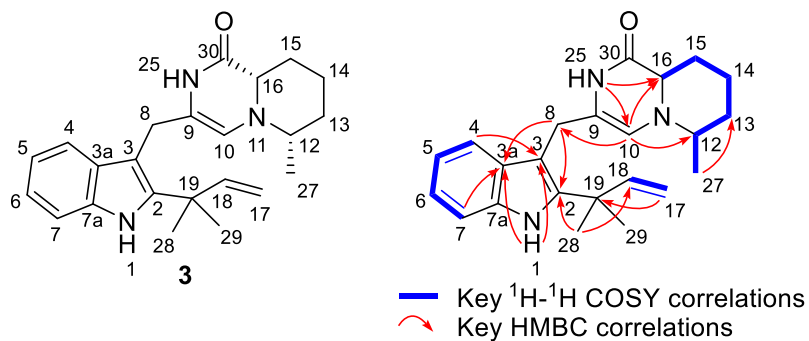

Supplementary Table 5 | NMR Data of compound 3 ( $\delta$  in ppm,  $J$  in Hz)<sup>a</sup>.

| Position | $^1\text{H}$          | $^{13}\text{C}$ |                 | $^1\text{H}$ - $^1\text{H}$ COSY | HMBC       |
|----------|-----------------------|-----------------|-----------------|----------------------------------|------------|
| 1(NH)    | 10.53 s               |                 |                 |                                  | C2, 3, 3a  |
| 2        |                       | 140.7           | C               |                                  |            |
| 3        |                       | 104.5           | C               |                                  |            |
| 3a       |                       | 129.1           | C               |                                  |            |
| 4        | 7.32 d (7.5)          | 117.7           | CH              | H5                               | C3, 6, 7a  |
| 5        | 6.92 dd (7.5, 7.5)    | 118.3           | CH              | H4, 6                            | C3a, 7     |
| 6        | 7.00 dd (7.5, 7.5)    | 120.4           | CH              | H5, 7                            | C4, 7a     |
| 7        | 7.32 d (7.5)          | 110.9           | CH              | H6                               | C3a, 5     |
| 7a       |                       | 134.7           | C               |                                  |            |
| 8        | 3.49 s                | 25.2            | CH <sub>2</sub> |                                  | C2, 3a, 10 |
| 9        |                       | 115.9           | C               |                                  |            |
| 10       | 4.95 s                | 112.8           | CH              |                                  | C3, 12, 16 |
| 12       | 2.46 m                | 54.4            | CH              | H13, 27                          |            |
| 13       | a 1.41 m              | 32.5            | CH <sub>2</sub> | H12, 14                          |            |
|          | b 0.98 m              |                 |                 | H12, 14                          |            |
| 14       | a 1.68 m              | 23.1            | CH <sub>2</sub> | H13, 15                          | C12        |
|          | b 1.30 m              |                 |                 | H13, 15                          |            |
| 15       | a 1.75 m              | 24.6            | CH <sub>2</sub> | H14                              | C13        |
|          | b 1.35 m              |                 |                 | H14                              |            |
| 16       | 3.01 m                | 60.7            | CH              |                                  |            |
| 17       | a 5.05 dd (17.4, 1.1) | 111.1           | CH <sub>2</sub> | H18                              | C19        |
|          | b 5.02 dd (10.5, 1.1) |                 |                 | H18                              |            |
| 18       | 6.16 dd (17.4, 10.5)  | 146.0           | CH              | H17                              | C28, 29    |
| 19       |                       | 38.9            | C               |                                  |            |
| 25 (NH)  | 9.03 s                |                 |                 |                                  |            |
| 27       | 0.75 d (6.3)          | 20.1            | CH <sub>3</sub> | H12                              | C13        |
| 28       | 1.48 s                | 27.5            | CH <sub>3</sub> |                                  | C2, 18, 29 |
| 29       | 1.48 s                | 27.5            | CH <sub>3</sub> |                                  | C2, 18, 28 |
| 30       |                       | 166.8           | C               |                                  |            |

<sup>a</sup>Measured in DMSO-*d*<sub>6</sub>, 600 MHz for  $^1\text{H}$  and 150 MHz for  $^{13}\text{C}$  NMR. Overlapped signals are reported without designating multiplicity.



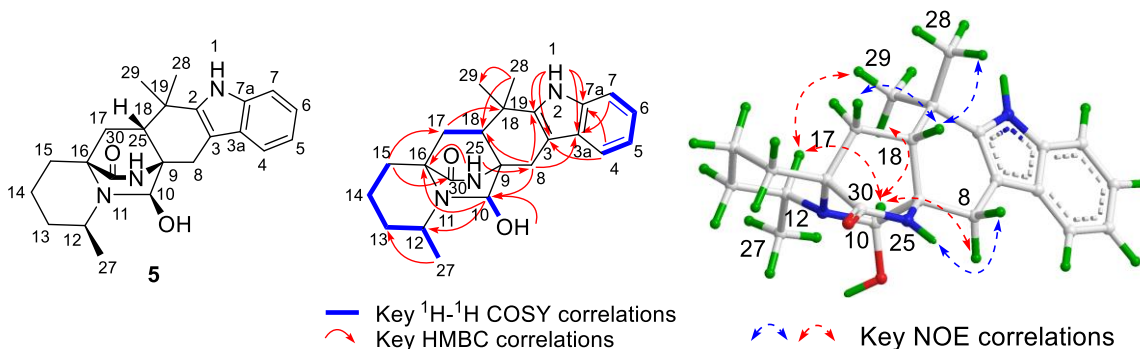

**Supplementary Table 6 | NMR Data of compound 5 ( $\delta$  in ppm,  $J$  in Hz)<sup>a</sup>**

| Position | $^1\text{H}$            | $^{13}\text{C}$ |               | $^1\text{H}$ - $^1\text{H}$ COSY | HMBC           | NOESY                |
|----------|-------------------------|-----------------|---------------|----------------------------------|----------------|----------------------|
| 1        | 7.83 s                  |                 | NH            |                                  | C2, 3, 3a, 7a  |                      |
| 2        |                         | 140.0           | C             |                                  |                |                      |
| 3        |                         | 104.3           | C             |                                  |                |                      |
| 3a       |                         | 127.1           | C             |                                  |                |                      |
| 4        | 7.48 d (7.8)            | 118.6           | CH            | H5                               | C3, 6, 7a      |                      |
| 5        | 7.18 dd (7.8, 7.8)      | 119.7           | CH            | H4, 6                            | C3a, 7         |                      |
| 6        | 7.11 dd (7.8, 7.8)      | 122.2           | CH            | H5, 7                            | C4, 7a         |                      |
| 7        | 7.32 d (7.8)            | 110.7           | CH            | H6                               | C3a, 5         |                      |
| 7a       |                         | 136.5           | C             |                                  |                |                      |
| 8        | $\alpha$ 3.78 d (15.5)  | 26.8            | $\text{CH}_2$ |                                  | C2, 3a, 10, 18 | H10                  |
|          | $\beta$ 2.53 d (15.5)   |                 |               |                                  |                | C2, 3a, 10, 18       |
| 9        |                         | 58.4            | C             |                                  |                |                      |
| 10       | 4.44 d (7.6)            | 81.5            | CH            | OH                               | C12, 16        | H8 $\alpha$ , 17, 29 |
| 12       | 3.01 m                  | 50.9            | CH            | H13, 27                          |                | H10, 29              |
| 13       | a 1.64 overlapped       | 35.1            | $\text{CH}_2$ | H12, 14                          | C15            |                      |
|          | b 1.18 m                |                 |               |                                  |                | H12, 14              |
| 14       | a 1.73 overlapped       | 19.8            | $\text{CH}_2$ | H13, 15                          |                |                      |
|          | b 1.50 m                |                 |               |                                  |                | H13, 15              |
| 15       | a 2.07 m                | 29.6            | $\text{CH}_2$ | H14                              | C17, 30        |                      |
|          | b 1.73 overlapped       |                 |               |                                  |                | H14                  |
| 16       |                         | 58.3            | C             |                                  |                |                      |
| 17       | $\alpha$ 2.43 m         | 24.5            | $\text{CH}_2$ | H18                              | C19, 30        | H12                  |
|          | $\beta$ 1.60 overlapped |                 |               |                                  |                | H18                  |
| 18       | 2.41 m                  | 48.1            | CH            | H17                              | C8, 10, 28, 29 | H28                  |
| 19       |                         | 34.9            | C             |                                  |                |                      |
| 25       | 5.91 s                  |                 | NH            |                                  |                | H8 $\beta$           |
| 27       | 1.12 d (6.1)            | 23.1            | $\text{CH}_3$ | H12                              | C13            |                      |
| 28       | 1.38 s                  | 31.1            | $\text{CH}_3$ |                                  | C3, 18, 29     | H18                  |
| 29       | 1.42 s                  | 27.1            | $\text{CH}_3$ |                                  | C3, 18, 28     | H10, 12              |
| 30       |                         | 175.0           | C             |                                  |                |                      |
| OH       | 1.57 d (7.6)            |                 |               | H10                              | C10            |                      |

<sup>a</sup>Measured in  $\text{CDCl}_3$ , 600 MHz for  $^1\text{H}$  and 150 MHz for  $^{13}\text{C}$  NMR. Overlapped signals are reported without designating multiplicity.

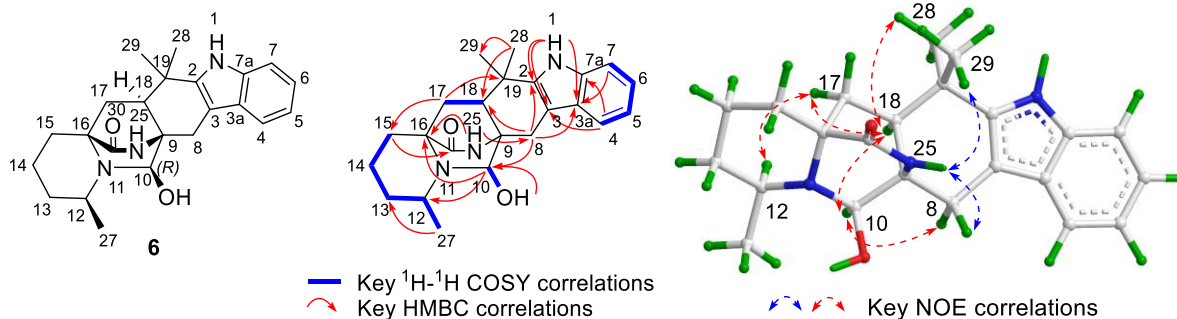

**Supplementary Table 7 | NMR Data of compound 6 ( $\delta$  in ppm,  $J$  in Hz)<sup>a</sup>.**

| Position | $^1\text{H}$           | $^{13}\text{C}$ |               | $^1\text{H}$ - $^1\text{H}$ COSY | HMBC       | NOESY            |
|----------|------------------------|-----------------|---------------|----------------------------------|------------|------------------|
| 1        | 9.10 s                 |                 | NH            |                                  | C2, 3, 3a  |                  |
| 2        |                        | 142.5           | C             |                                  |            |                  |
| 3        |                        | 104.6           | C             |                                  |            |                  |
| 3a       |                        | 128.4           | C             |                                  |            |                  |
| 4        | 7.63 d (7.7)           | 118.7           | CH            | H5                               | C3, 6, 7a  |                  |
| 5        | 7.08 dd (7.7, 7.7)     | 119.6           | CH            | H4, 6                            | C3a, 7     |                  |
| 6        | 7.01 dd (7.7, 7.7)     | 121.9           | CH            | H5, 7                            | C4, 7a     |                  |
| 7        | 7.31 d (7.7)           | 111.5           | CH            | H6                               | C3a, 5     |                  |
| 7a       |                        | 137.5           | C             |                                  |            |                  |
| 8        | $\beta$ 2.99 d (17.4)  | 27.9            | $\text{CH}_2$ |                                  | C2, 3a, 18 | H25              |
|          | $\alpha$ 2.91 d (17.4) |                 |               |                                  | C2, 10     | H10              |
| 9        |                        | 57.6            | C             |                                  |            |                  |
| 10       | 3.87 d (8.1)           | 91.0            | CH            | OH                               | C12        | H8 $\alpha$ , 18 |
| 12       | 2.81 m                 | 53.1            | CH            | H13, 27                          | C10, 16    | H17 $\alpha$     |
| 13       | a 1.64 m               | 35.7            | $\text{CH}_2$ | H12, 14                          | C15        |                  |
|          | b 1.13 m               |                 |               | H12, 14                          |            |                  |
| 14       | a 1.61 overlapped      | 20.0            | $\text{CH}_2$ | H13, 15                          |            |                  |
|          | b 1.54 m               |                 |               | H13, 15                          |            |                  |
| 15       | a 1.84 m               | 30.2            | $\text{CH}_2$ | H14                              | C17        |                  |
|          | b 1.61 overlapped      |                 |               | H14                              | C13        |                  |
| 16       |                        | 58.9            | C             |                                  |            |                  |
| 17       | $\alpha$ 2.62 m        | 24.7            | $\text{CH}_2$ | H18                              | C19, 30    | H12, 18          |
|          | $\beta$ 1.28 m         |                 |               | H18                              |            |                  |
| 18       | 1.97 m                 | 44.2            | CH            | H17                              | C8, 29     | H28              |
| 19       |                        | 35.0            | C             |                                  |            |                  |
| 25       | 6.33 s                 |                 | NH            |                                  |            | H8 $\beta$ , 29  |
| 27       | 1.15 d (6.1)           | 23.4            | $\text{CH}_3$ | H12                              | C13        |                  |
| 28       | 1.28 s                 | 28.4            | $\text{CH}_3$ |                                  | C3, 18, 29 | H18              |
| 29       | 1.17 s                 | 24.7            | $\text{CH}_3$ |                                  | C3, 18, 28 | H25              |
| 30       |                        | 174.9           | C             |                                  |            |                  |
| OH       | 2.61 overlapped        |                 |               | H10                              | C10        |                  |

<sup>a</sup>Measured in  $\text{CD}_3\text{CN}$ , 600 MHz for  $^1\text{H}$  and 150 MHz for  $^{13}\text{C}$  NMR. Overlapped signals are reported without designating multiplicity.

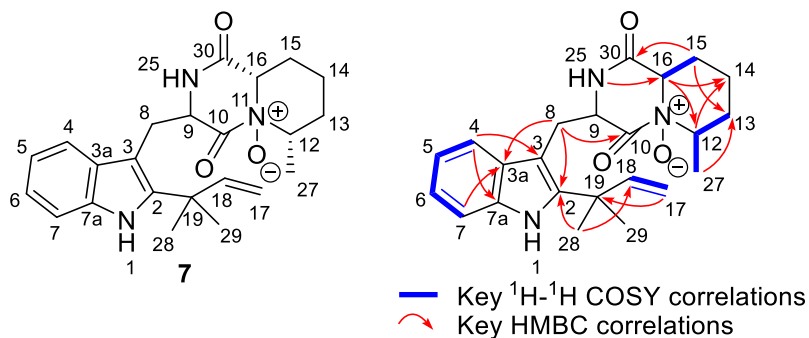

Supplementary Table 8 | NMR Data of compound 7 ( $\delta$  in ppm,  $J$  in Hz)<sup>a</sup>.

| Position | $^1\text{H}$         | $^{13}\text{C}$ |                 | $^1\text{H}$ - $^1\text{H}$ COSY | HMBC       |
|----------|----------------------|-----------------|-----------------|----------------------------------|------------|
| 1        | 10.64 s              |                 | NH              |                                  | C2, 3, 3a  |
| 2        |                      | 141.3           | C               |                                  |            |
| 3        |                      | 102.5           | C               |                                  |            |
| 3a       |                      | 129.4           | C               |                                  |            |
| 4        | 7.29 d (7.8)         | 117.5           | CH              | H5                               | C3, 6, 7a  |
| 5        | 6.92 dd (7.8, 7.8)   | 118.4           | CH              | H4, 6                            | C3a, 7     |
| 6        | 7.02 dd (7.8, 7.8)   | 120.5           | CH              | H5, 7                            | C4, 7a     |
| 7        | 7.31 d (7.8)         | 110.9           | CH              | H6                               | C3a, 5     |
| 7a       |                      | 134.6           | C               |                                  |            |
| 8        | 3.98 s               | 33.4            | CH <sub>2</sub> |                                  | C2, 3a, 10 |
| 9        | Missing              | Missing         | C               |                                  |            |
| 10       |                      | 172.2           | C               |                                  |            |
| 12       | 4.00 overlapped      | 48.5            | CH              | H13, 27                          | C14        |
| 13       | 1.62 overlapped      | 27.5            | CH <sub>2</sub> | H12                              |            |
|          | 1.52 overlapped      |                 |                 |                                  |            |
| 14       | a 1.63 overlapped    | 15.9            | CH <sub>2</sub> |                                  |            |
|          | b 1.51 overlapped    |                 |                 |                                  |            |
| 15       | a 2.00 m             | 24.7            | CH <sub>2</sub> | H16                              | C2, 12     |
|          | b 1.56 m             |                 |                 |                                  |            |
| 16       | 4.91 m               | 51.2            | CH              |                                  |            |
| 17       | a 5.06 d (17.4)      | 111.2           | CH <sub>2</sub> | H18                              | C19        |
|          | b 5.03 dd (10.6)     |                 |                 |                                  |            |
| 18       | 6.08 dd (17.4, 10.6) | 145.9           | CH              | H17                              | C2, 28/29  |
| 19       |                      | 39.5            | C               |                                  |            |
| 25       | 8.09 s               |                 | NH              |                                  | C16        |
| 27       | 1.21 d (7.0)         | 21.5            | CH <sub>3</sub> | H12                              | C13        |
| 28       | 1.44 s               | 27.5            | CH <sub>3</sub> |                                  | C2, 18     |
| 29       | 1.44 s               | 27.5            | CH <sub>3</sub> |                                  | C2, 18     |
| 30       |                      | 171.7           | C               |                                  |            |

<sup>a</sup>Measured in DMSO-*d*<sub>6</sub>, 600 MHz for  $^1\text{H}$  and 150 MHz for  $^{13}\text{C}$  NMR. Overlapped signals are reported without designating multiplicity.

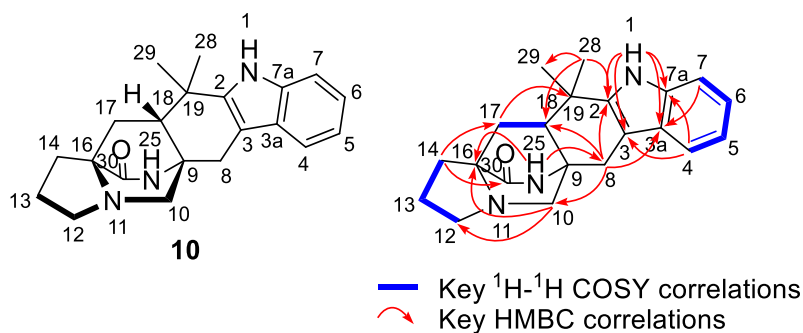

Supplementary Table 9 | NMR Data of compound 10 ( $\delta$  in ppm,  $J$  in Hz)<sup>a</sup>.

| Position | $^1\text{H}$           | $^{13}\text{C}$ |                 | $^1\text{H}$ - $^1\text{H}$ COSY | HMBC               | NOESY            |
|----------|------------------------|-----------------|-----------------|----------------------------------|--------------------|------------------|
| 1        | 9.12 s                 |                 | NH              |                                  |                    |                  |
| 2        |                        | 142.9           | C               |                                  |                    |                  |
| 3        |                        | 104.3           | C               |                                  |                    |                  |
| 3a       |                        | 128.2           | C               |                                  |                    |                  |
| 4        | 7.40 d (7.7)           | 118.5           | CH              | H5                               | C3, 6, 7a          | H8 $\alpha$      |
| 5        | 7.01 dd (7.7, 7.7)     | 119.7           | CH              | H4, 6                            | C3a, 7             |                  |
| 6        | 7.02 dd (7.7, 7.7)     | 121.9           | CH              | H5, 7                            | C4, 7a             |                  |
| 7        | 7.31 d (7.7)           | 111.5           | CH              | H6                               | C3a, 5             | H1               |
| 7a       |                        | 137.6           | C               |                                  |                    |                  |
| 8        | $\alpha$ 2.90 d (17.0) | 29.0            | CH <sub>2</sub> |                                  | C2, 3a, 18         | H4, 25           |
|          | $\beta$ 2.82 d (17.0)  |                 |                 |                                  | C2, 3a, 10         | H10 $\beta$ , 18 |
| 9        |                        | 56.4            | C               |                                  |                    |                  |
| 10       | $\alpha$ 3.07 d (10.1) | 62.5            | CH <sub>2</sub> |                                  | C12, 16            | H12              |
|          | $\beta$ 2.62 d (10.1)  |                 |                 |                                  | C8, 12, 16, 18     | H8 $\beta$       |
| 12       | a 3.02 m               | 53.7            | CH <sub>2</sub> | H13                              |                    | H10 $\alpha$     |
|          | b 2.31 dd (16.6, 8.5)  |                 |                 | H13                              |                    |                  |
| 13       | a 1.83 m               | 23.5            | CH <sub>2</sub> | H12, 14                          | C15                |                  |
|          | b 1.80 m               |                 |                 | H12, 14                          | C27                |                  |
| 14       | a 2.42 m               | 28.0            | CH <sub>2</sub> | H13                              | C12                |                  |
|          | b 1.36 m               |                 |                 | H13                              | C16                |                  |
| 16       |                        | 65.8            | C               |                                  |                    |                  |
| 17       | $\beta$ 2.06 m         | 32.2            | CH <sub>2</sub> | H18                              | C15, 19, 30        |                  |
|          | $\alpha$ 1.89 m        |                 |                 | H18                              | C15, 19, 30        |                  |
| 18       | 2.17 overlapped        | 46.9            | CH              | H17                              | C8, 10, 16, 28, 29 | H8 $\beta$ , 28  |
| 19       |                        | 35.1            | C               |                                  |                    |                  |
| 25       | 6.44 s                 |                 | NH              |                                  | C10, 16            | H8 $\alpha$ , 29 |
| 28       | 1.26 s                 | 28.0            | CH <sub>3</sub> |                                  | C2, 18, 29         | H18              |
| 29       | 1.16 s                 | 24.5            | CH <sub>3</sub> |                                  | C2, 18, 28         | H25              |
| 30       |                        | 174.2           | C               |                                  |                    |                  |

<sup>a</sup>Measured in CD<sub>3</sub>CN, 600 MHz for  $^1\text{H}$  and 150 MHz for  $^{13}\text{C}$  NMR. Overlapped signals are reported without designating multiplicity.

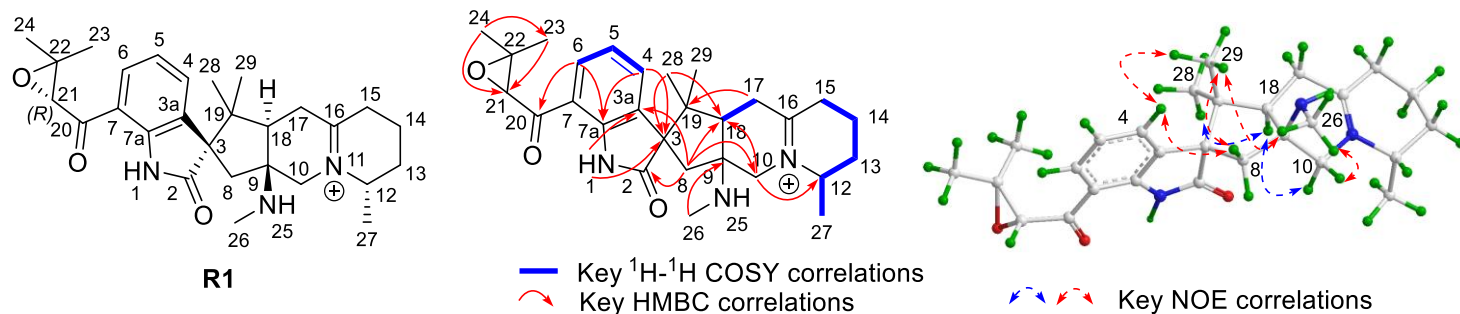

Supplementary Table 10 | NMR Data of compound R1 ( $\delta$  in ppm,  $J$  in Hz)<sup>a</sup>.

| Position | $^1\text{H}$           | $^{13}\text{C}$ |                 | $^1\text{H}$ - $^1\text{H}$ COSY | HMBC           | NOESY              |
|----------|------------------------|-----------------|-----------------|----------------------------------|----------------|--------------------|
| 1        | 9.64 s                 |                 | NH              |                                  | C3, 3a         |                    |
| 2        |                        | 182.5           | C               |                                  |                |                    |
| 3        |                        | 64.4            | C               |                                  |                |                    |
| 3a       |                        | 131.8           | C               |                                  |                |                    |
| 4        | 7.46 d (7.7)           | 131.1           | CH              | H5                               | C3, 6, 7a      | H8 $\beta$ , 29    |
| 5        | 7.10 dd (7.7, 7.7)     | 121.0           | CH              | H4, 6                            | C3a, 7         |                    |
| 6        | 7.76 d (7.7)           | 128.0           | CH              | H5                               | C4, 7a         |                    |
| 7        |                        | 116.8           | C               |                                  |                |                    |
| 7a       |                        | 144.0           | C               |                                  |                |                    |
| 8        | $\beta$ 2.34 d (14.8)  | 32.9            | CH <sub>2</sub> |                                  | C2, 3a, 10, 18 | H4, 29             |
|          | $\alpha$ 2.05 d (14.8) |                 |                 |                                  | C2, 3a, 10, 19 | H10, 12            |
| 9        |                        | 76.0            | C               |                                  |                |                    |
| 10       | $\beta$ 4.00 m         | 57.9            | CH <sub>2</sub> |                                  |                | H18                |
|          | $\alpha$ 2.82 m        |                 |                 |                                  | C12, 18        | H26                |
| 12       | 2.81 m                 | 63.2            | CH              | H13, 27                          | C14            |                    |
| 13       | a 1.85 overlapped      | 30.7            | CH <sub>2</sub> | H12, 14                          |                |                    |
|          | b 1.69 overlapped      |                 |                 | H12, 14                          |                |                    |
| 14       | 1.86 overlapped        | 20.4            | CH <sub>2</sub> | H13, 15                          | C12, 16        |                    |
|          | 1.69 overlapped        |                 |                 |                                  |                |                    |
| 15       | a 2.26 overlapped      | 27.7            | CH <sub>2</sub> | H14, 16                          |                |                    |
|          | b 2.24 overlapped      |                 |                 | H14, 16                          | C13            |                    |
| 16       | missing                | missing         | C               |                                  |                |                    |
| 17       | a 2.42 overlapped      | 38.9            | CH <sub>2</sub> | H18                              |                |                    |
|          | b 1.66 overlapped      |                 |                 | H18                              | C19            |                    |
| 18       | 3.05 m                 | 52.5            | CH              | H17                              | C10            | H-28               |
| 19       |                        | 47.3            | C               |                                  |                |                    |
| 20       |                        | 194.9           | C               |                                  |                |                    |
| 21       | 4.02 s                 | 64.4            | CH              |                                  | C23, 24        |                    |
| 22       |                        | 61.6            | C               |                                  |                |                    |
| 23       | 1.60 s                 | 24.4            | CH <sub>3</sub> |                                  | C21, 24        |                    |
| 24       | 1.25 s                 | 18.8            | CH <sub>3</sub> |                                  | C21, 23        |                    |
| 26       | 2.47 s                 | 30.7            | CH <sub>3</sub> |                                  | C9             | H29                |
| 27       | 1.35 d (3.5)           | 20.4            | CH <sub>3</sub> | H12                              | C13            |                    |
| 28       | 0.72 s                 | 23.5            | CH <sub>3</sub> |                                  | C3, 18, 29     | H18                |
| 29       | 1.06 s                 | 22.1            | CH <sub>3</sub> |                                  | C3, 18, 28     | H4, 8 $\beta$ , 26 |

<sup>a</sup>Measured in CDCl<sub>3</sub>, 600 MHz for  $^1\text{H}$  and 150 MHz for  $^{13}\text{C}$  NMR. Overlapped signals are reported without designating multiplicity.

**Supplementary Table 11 | Crystal data and structure refinement for compound 5.**

|                                             |                                                               |
|---------------------------------------------|---------------------------------------------------------------|
| Empirical formula                           | C <sub>23</sub> H <sub>29</sub> N <sub>3</sub> O <sub>2</sub> |
| Formula weight                              | 379.49                                                        |
| Temperature/K                               | 100.15                                                        |
| Crystal system                              | monoclinic                                                    |
| Space group                                 | P2 <sub>1</sub>                                               |
| a/Å                                         | 9.17410(10)                                                   |
| b/Å                                         | 22.2451(2)                                                    |
| c/Å                                         | 11.6697(2)                                                    |
| α/°                                         | 90                                                            |
| β/°                                         | 106.2410(10)                                                  |
| γ/°                                         | 90                                                            |
| Volume/Å <sup>3</sup>                       | 2286.50(5)                                                    |
| Z                                           | 4                                                             |
| ρ <sub>calc</sub> /g/cm <sup>3</sup>        | 1.102                                                         |
| μ/mm <sup>-1</sup>                          | 0.562                                                         |
| F(000)                                      | 816.0                                                         |
| Crystal size/mm <sup>3</sup>                | 0.38 × 0.28 × 0.14                                            |
| Radiation                                   | Cu Kα (λ = 1.54184)                                           |
| 2θ range for data collection/°              | 7.89 to 149                                                   |
| Index ranges                                | -11 ≤ h ≤ 11, -22 ≤ k ≤ 27, -14 ≤ l ≤ 14                      |
| Reflections collected                       | 25927                                                         |
| Independent reflections                     | 7483 [R <sub>int</sub> = 0.0289, R <sub>sigma</sub> = 0.0242] |
| Data/restraints/parameters                  | 7483/1/582                                                    |
| Goodness-of-fit on F <sup>2</sup>           | 1.043                                                         |
| Final R indexes [I ≥ 2σ (I)]                | R <sub>1</sub> = 0.0357, wR <sub>2</sub> = 0.0980             |
| Final R indexes [all data]                  | R <sub>1</sub> = 0.0362, wR <sub>2</sub> = 0.0984             |
| Largest diff. peak/hole / e Å <sup>-3</sup> | 0.29/-0.22                                                    |
| Flack parameter                             | 0.04(9)                                                       |
| CCDC number                                 | 2127333                                                       |

**Supplementary Table 12 | Crystal data and structure refinement for compound 10.**

---

|                                             |                                                               |
|---------------------------------------------|---------------------------------------------------------------|
| Empirical formula                           | C <sub>23</sub> H <sub>29</sub> N <sub>3</sub> O <sub>2</sub> |
| Formula weight                              | 379.49                                                        |
| Temperature/K                               | 99.99(10)                                                     |
| Crystal system                              | monoclinic                                                    |
| Space group                                 | P2 <sub>1</sub>                                               |
| a/Å                                         | 9.17410(10)                                                   |
| b/Å                                         | 22.2451(2)                                                    |
| c/Å                                         | 11.6697(2)                                                    |
| α/°                                         | 90                                                            |
| β/°                                         | 106.2410(10)                                                  |
| γ/°                                         | 90                                                            |
| Volume/Å <sup>3</sup>                       | 2286.50(5)                                                    |
| Z                                           | 4                                                             |
| ρ <sub>calc</sub> /cm <sup>3</sup>          | 1.102                                                         |
| μ/mm <sup>-1</sup>                          | 0.562                                                         |
| F(000)                                      | 816.0                                                         |
| Crystal size/mm <sup>3</sup>                | 0.38 × 0.28 × 0.14                                            |
| Radiation                                   | Cu Kα (λ = 1.54184)                                           |
| 2θ range for data collection/°              | 7.89 to 149                                                   |
| Index ranges                                | -11 ≤ h ≤ 11, -22 ≤ k ≤ 27, -14 ≤ l ≤ 14                      |
| Reflections collected                       | 25927                                                         |
| Independent reflections                     | 7483 [R <sub>int</sub> = 0.0289, R <sub>sigma</sub> = 0.0242] |
| Data/restraints/parameters                  | 7483/1/741                                                    |
| Goodness-of-fit on F <sup>2</sup>           | 1.052                                                         |
| Final R indexes [I ≥ 2σ (I)]                | R1 = 0.0344, wR2 = 0.0942                                     |
| Final R indexes [all data]                  | R1 = 0.0348, wR2 = 0.0946                                     |
| Largest diff. peak/hole / e Å <sup>-3</sup> | 0.26/-0.21                                                    |
| Flack parameter                             | 0.05(9)                                                       |
| CCDC number                                 | 2127332                                                       |

---

Supplementary Table 13 | Crystallographic data collection and structure refinement statistics.

|                                       | SeMet CtdP                |
|---------------------------------------|---------------------------|
| <b>PDB code</b>                       | 7UF8                      |
| <b>Data Collection*</b>               |                           |
| Space group                           | P 6 <sub>1</sub> 2 2      |
| <u>Cell Dimensions</u>                |                           |
| <i>a</i> , <i>b</i> , <i>c</i> (Å)    | 166.8, 166.8, 195.4       |
| $\alpha$ , $\beta$ , $\gamma$ (°)     | 90, 90, 120               |
| Wavelength (Å)                        | 0.979                     |
| Resolution range (Å)                  | 48.14 - 2.5 (2.589 - 2.5) |
| R <sub>meas</sub> (%)                 | 18.45 (3.161)             |
| <i>I</i> / $\sigma$ <i>I</i>          | 24.52 (2.07)              |
| Completeness (%)                      | 99.77 (99.18)             |
| Redundancy                            | 39.8 (39.3)               |
| <b>Refinement</b>                     |                           |
| Resolution range (Å)                  | 48.14 - 2.5               |
| No. Reflections                       | 55726                     |
| R <sub>work</sub> / R <sub>free</sub> | 0.214 / 0.245             |
| <u>No. Atoms</u>                      |                           |
| Protein                               | 10397                     |
| Ligand                                | 462                       |
| Water                                 | 1325                      |
| <u>B-factors (Å<sup>2</sup>)</u>      |                           |
| Protein                               | 71.97                     |
| Ligand                                | 74.51                     |
| Water                                 | 58.56                     |
| <u>R.M.S. deviations</u>              |                           |
| Bond lengths (Å)                      | 0.011                     |
| Bond angles (°)                       | 1.26                      |

\*Values in parentheses are for highest-resolution shell



**Supplementary Table 14 | Structural homologs of CtdP identified by DALI server<sup>1</sup>.**

| No | Protein                                                              | PDB-Chain | Z score | rmsd | Number of structurally equivalent residues | Total number of amino acids | %identity |
|----|----------------------------------------------------------------------|-----------|---------|------|--------------------------------------------|-----------------------------|-----------|
| 1  | NADP(H) sensor HSCARG protein ( <i>Homo sapiens</i> )                | 2exx-A    | 31.8    | 2    | 290                                        | 305                         | 24        |
| 2  | NmrA-like family domain containing protein 1 ( <i>Homo sapiens</i> ) | 2wmd-A    | 31.9    | 2.1  | 289                                        | 295                         | 24        |
| 3  |                                                                      | 2wm3-A    | 31.8    | 2.1  | 289                                        | 296                         | 24        |
| 4  |                                                                      | 3dxf-A    | 31.5    | 2.1  | 288                                        | 292                         | 24        |
| 5  | NmrA-like family domain containing protein 1                         | 3e5m-A    | 31.4    | 2    | 287                                        | 294                         | 24        |
| 6  |                                                                      | 3e5m-B    | 31.1    | 2    | 287                                        | 295                         | 24        |
| 7  | NmrA ( <i>Aspergillus nidulans</i> )                                 | 1k6i-A    | 30.2    | 2.6  | 294                                        | 318                         | 20        |
| 8  | NmrA                                                                 | 1xgk-A    | 30.2    | 2.6  | 295                                        | 325                         | 21        |
| 9  | NmrA-like family domain containing protein 1                         | 3dxf-B    | 30.1    | 2.1  | 280                                        | 282                         | 24        |
| 10 | NmrA                                                                 | 1k6j-B    | 30.1    | 2.7  | 296                                        | 321                         | 20        |
| 11 |                                                                      | 1ti7-A    | 30      | 2.6  | 294                                        | 324                         | 20        |
| 12 |                                                                      | 2vuu-A    | 29.8    | 2.7  | 294                                        | 318                         | 20        |
| 13 |                                                                      | 2vus-E    | 29.8    | 2.9  | 297                                        | 318                         | 20        |
| 14 |                                                                      | 2vus-D    | 29.8    | 2.9  | 297                                        | 318                         | 20        |
| 15 |                                                                      | 2vus-B    | 29.7    | 2.7  | 294                                        | 318                         | 20        |
| 16 |                                                                      | 2vuu-F    | 29.7    | 2.7  | 294                                        | 318                         | 20        |
| 17 |                                                                      | 2vus-F    | 29.7    | 2.7  | 294                                        | 318                         | 20        |
| 18 |                                                                      | 2vuu-G    | 29.7    | 2.7  | 294                                        | 319                         | 20        |
| 19 |                                                                      | 2vuu-E    | 29.7    | 2.7  | 294                                        | 318                         | 20        |
| 20 |                                                                      | 2vus-G    | 29.7    | 2.7  | 294                                        | 318                         | 20        |
| 21 |                                                                      | 1k6x-A    | 29.6    | 2.6  | 293                                        | 324                         | 21        |
| 22 |                                                                      | 2vuu-D    | 29.6    | 2.7  | 295                                        | 319                         | 20        |
| 23 |                                                                      | 1k6j-A    | 29.5    | 2.6  | 294                                        | 322                         | 21        |
| 24 |                                                                      | 2vut-G    | 29.5    | 2.8  | 295                                        | 319                         | 20        |
| 25 |                                                                      | 2vut-D    | 29.4    | 2.8  | 294                                        | 320                         | 20        |
| 26 |                                                                      | 2vuu-B    | 29.4    | 2.8  | 293                                        | 319                         | 20        |
| 27 |                                                                      | 2vus-A    | 29.3    | 2.6  | 291                                        | 318                         | 21        |
| 28 |                                                                      | 2vus-C    | 29.2    | 2.6  | 292                                        | 318                         | 21        |
| 29 |                                                                      | 2vuu-C    | 29.2    | 2.6  | 292                                        | 318                         | 21        |
| 30 |                                                                      | 2vus-H    | 29.1    | 2.6  | 292                                        | 318                         | 21        |
| 31 |                                                                      | 2vuu-H    | 29.1    | 2.7  | 292                                        | 319                         | 21        |
| 32 |                                                                      | 2vut-F    | 29.1    | 2.6  | 291                                        | 318                         | 21        |
| 33 |                                                                      | 2vut-A    | 29.1    | 2.7  | 293                                        | 318                         | 21        |
| 34 |                                                                      | 2vut-C    | 29.1    | 2.6  | 291                                        | 318                         | 21        |
| 35 |                                                                      | 2vut-E    | 29.0    | 2.6  | 291                                        | 318                         | 21        |
| 36 |                                                                      | 2vut-H    | 29.0    | 2.7  | 292                                        | 319                         | 21        |
| 37 | NmrA-like protein KstA11 ( <i>Micromonospora sp.</i> TP-A0468)       | 5f5n-A    | 28.9    | 2.5  | 281                                        | 289                         | 26        |

## Supplementary Figures

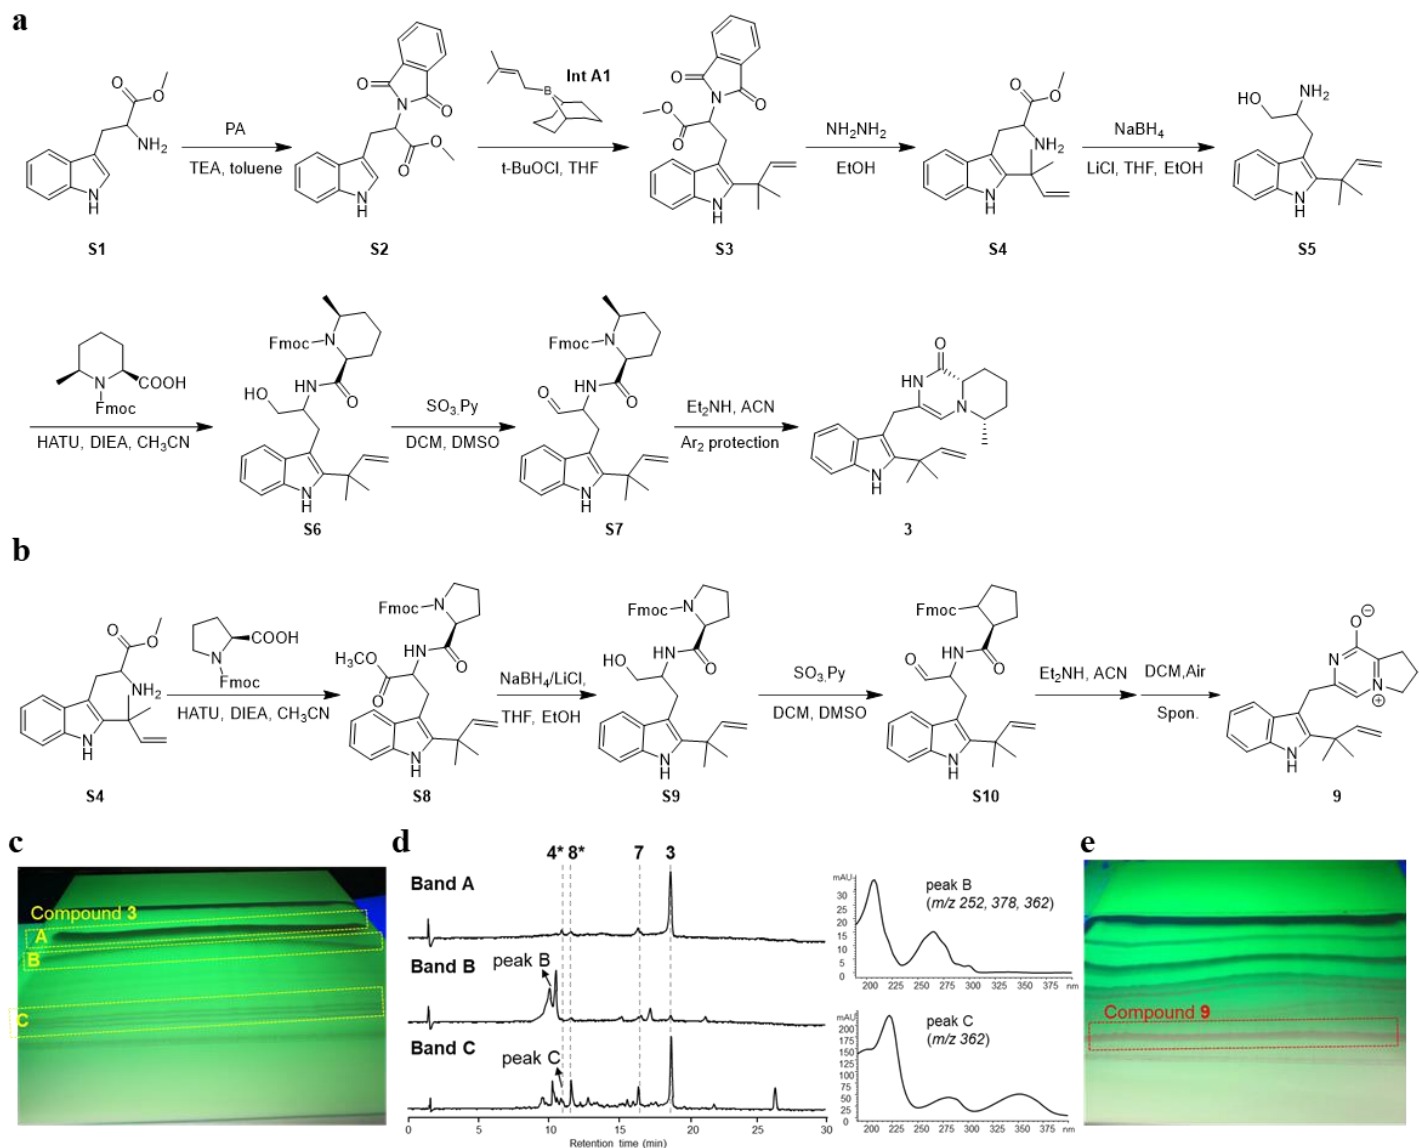

**Supplementary Fig. 1 | Biomimetic synthesis of the CtdP and MalC substrates. a**, Compound **3** synthetic pathway. **b**, Compound **9** synthetic pathway. **c**, Thin-layer chromatography (TLC) purification of compound **3** after the reaction from **S7**. **d**, LCMS analysis of bands A-C in **c**. Band A is pure **3**, while band C is presumed to be tautomerized to major **3** and proposed to contain compound **4** based on its UV and MS data. **e**, TLC purification of compound **9** after the reaction from **S10**. The symbol \* represents the compound identified by MS and UV spectra.

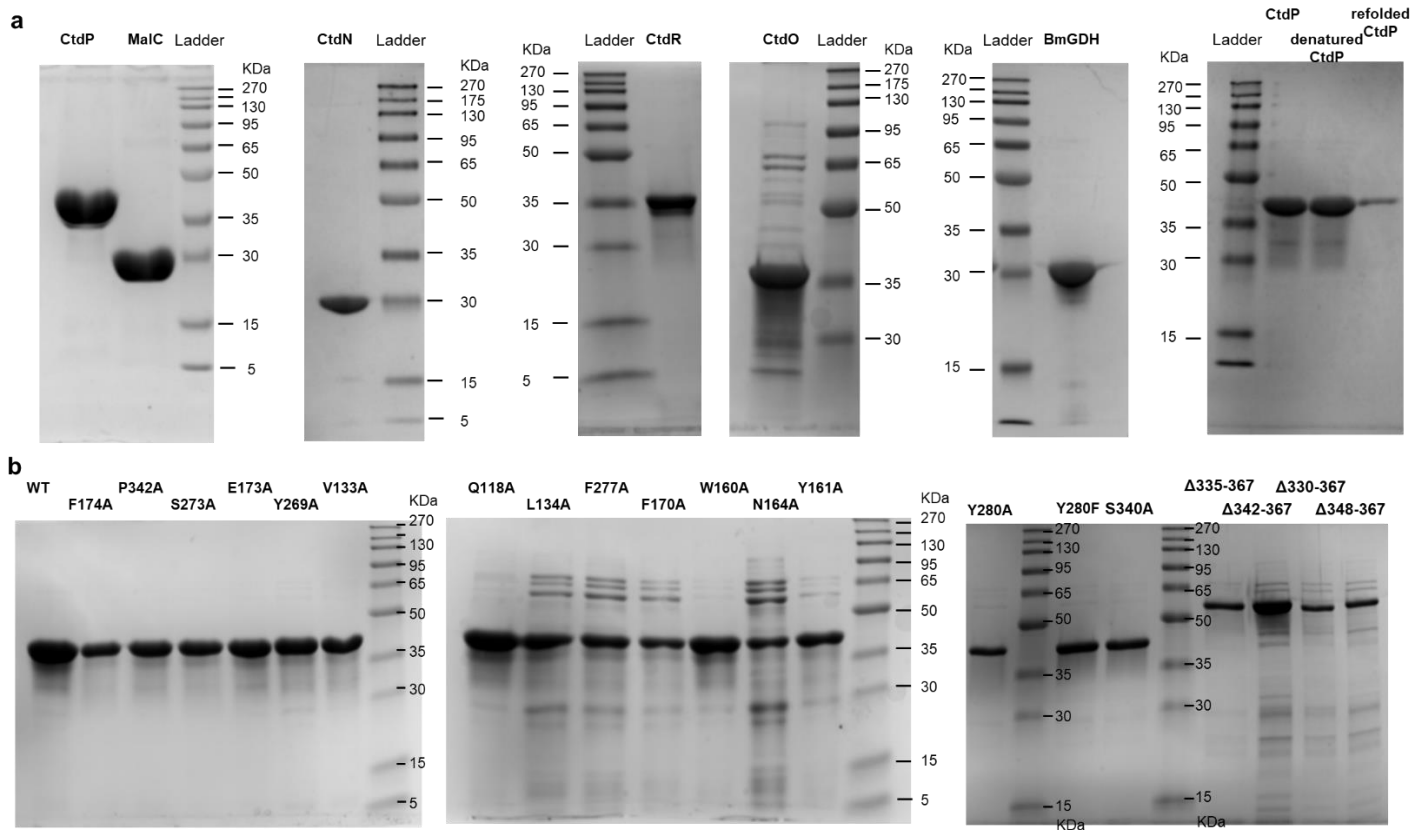

**Supplementary Fig. 2 | SDS-PAGE (12%) analysis of purified proteins. a.** C-His-tagged proteins of CtdP, MalC, CtdN, CtdR, CtdO, BmGDH, and refolded CtdP enzymes. **b.** C-His-tagged proteins of CtdP mutants. Experiments in **a** and **b** were repeated independently with similar results for three times.

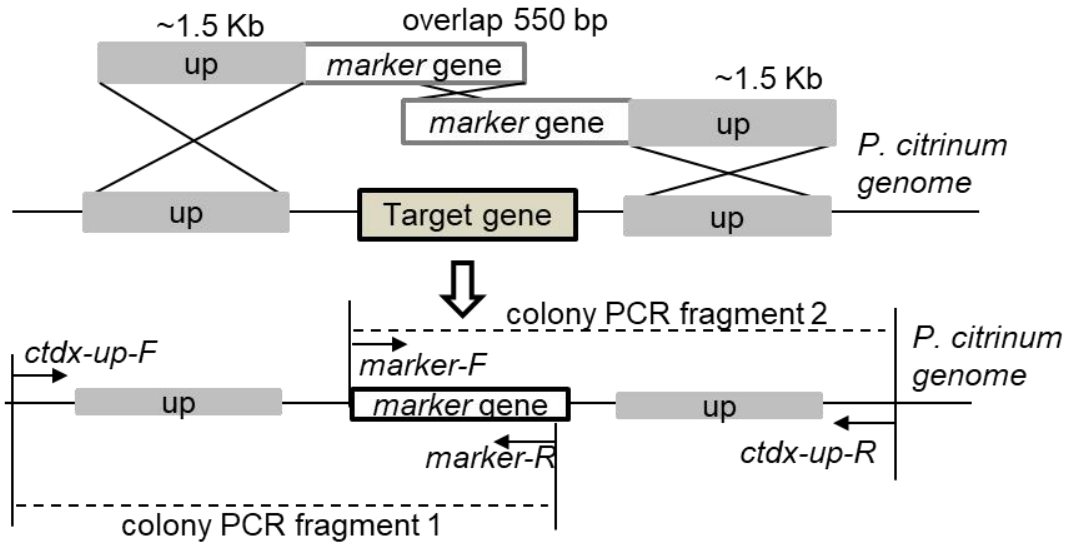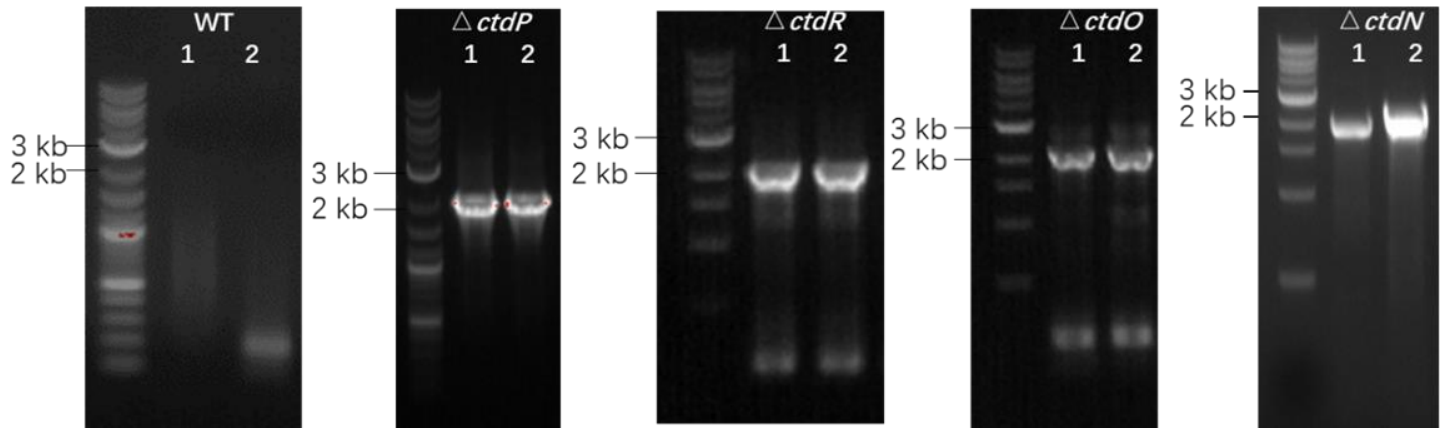

**Supplementary Fig. 3 | PCR confirmation of *ctd* mutants.** *ctd* transformants were screened by PCR using primers *ctdx-up-F* and *bar-R* for up-stream screening, primers *bar-F* and *ctdx-dn-R* for down-stream screening.

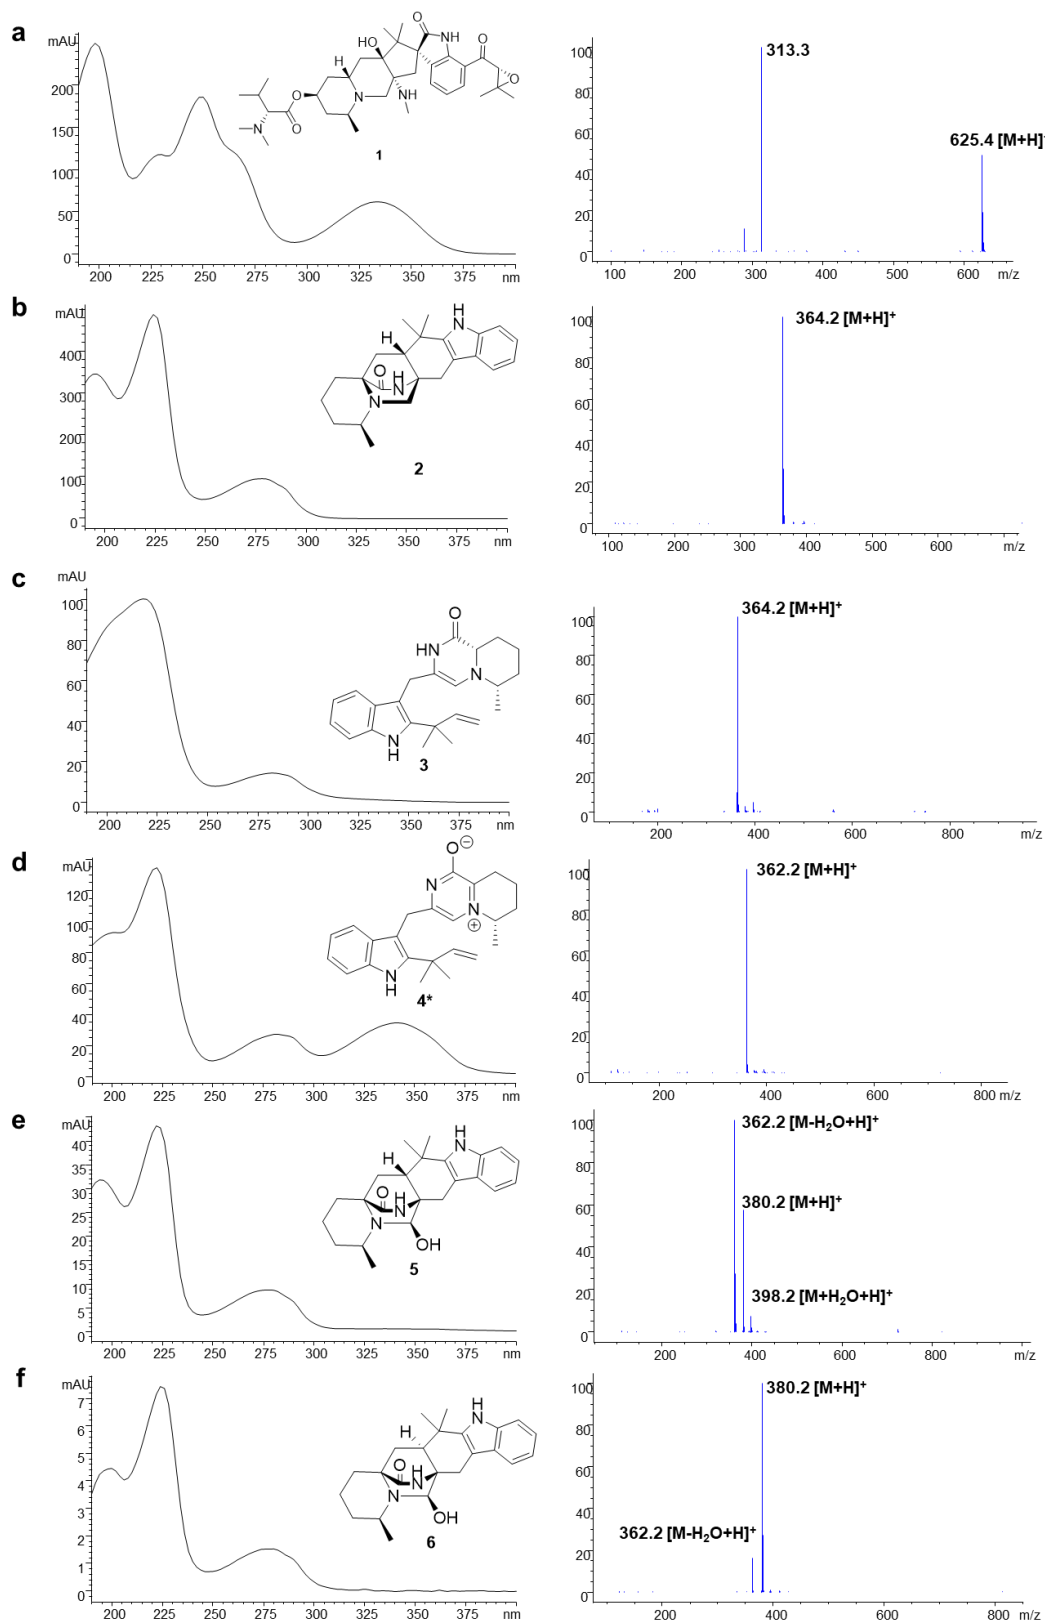

Supplementary Fig. 4 | UV and mass spectra of compounds 1-6.

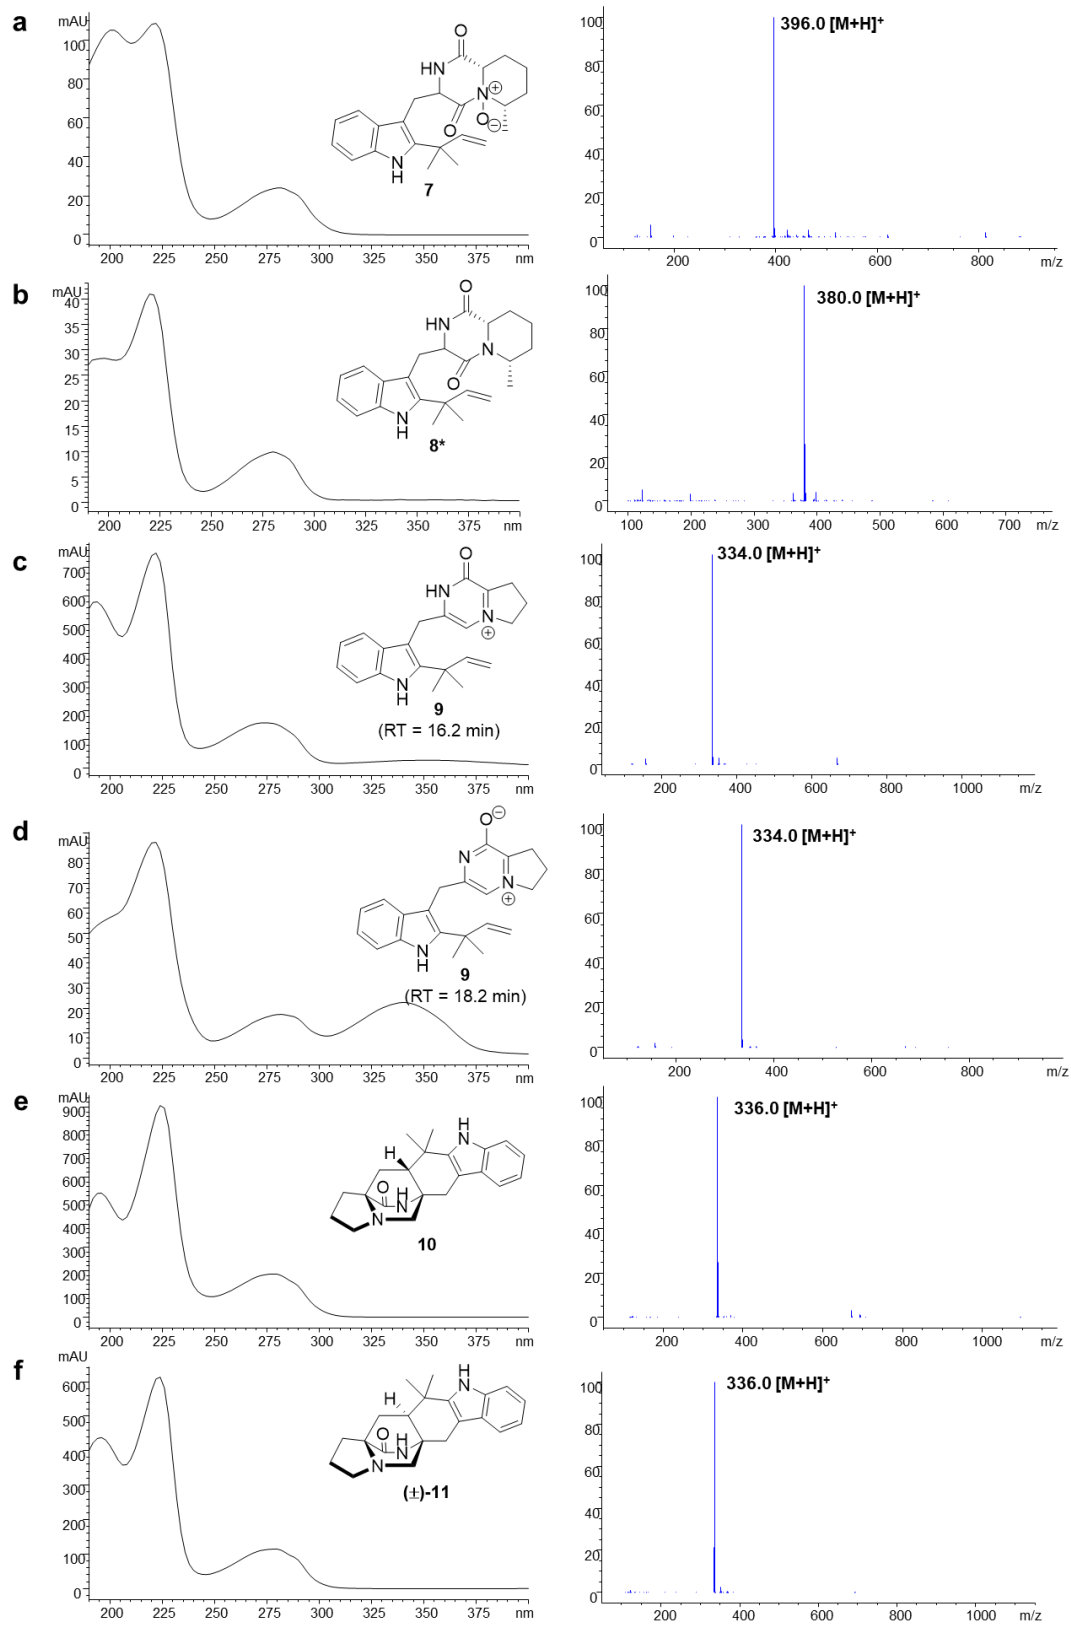

Supplementary Fig. 5 | UV and mass spectra of compounds 7-11.

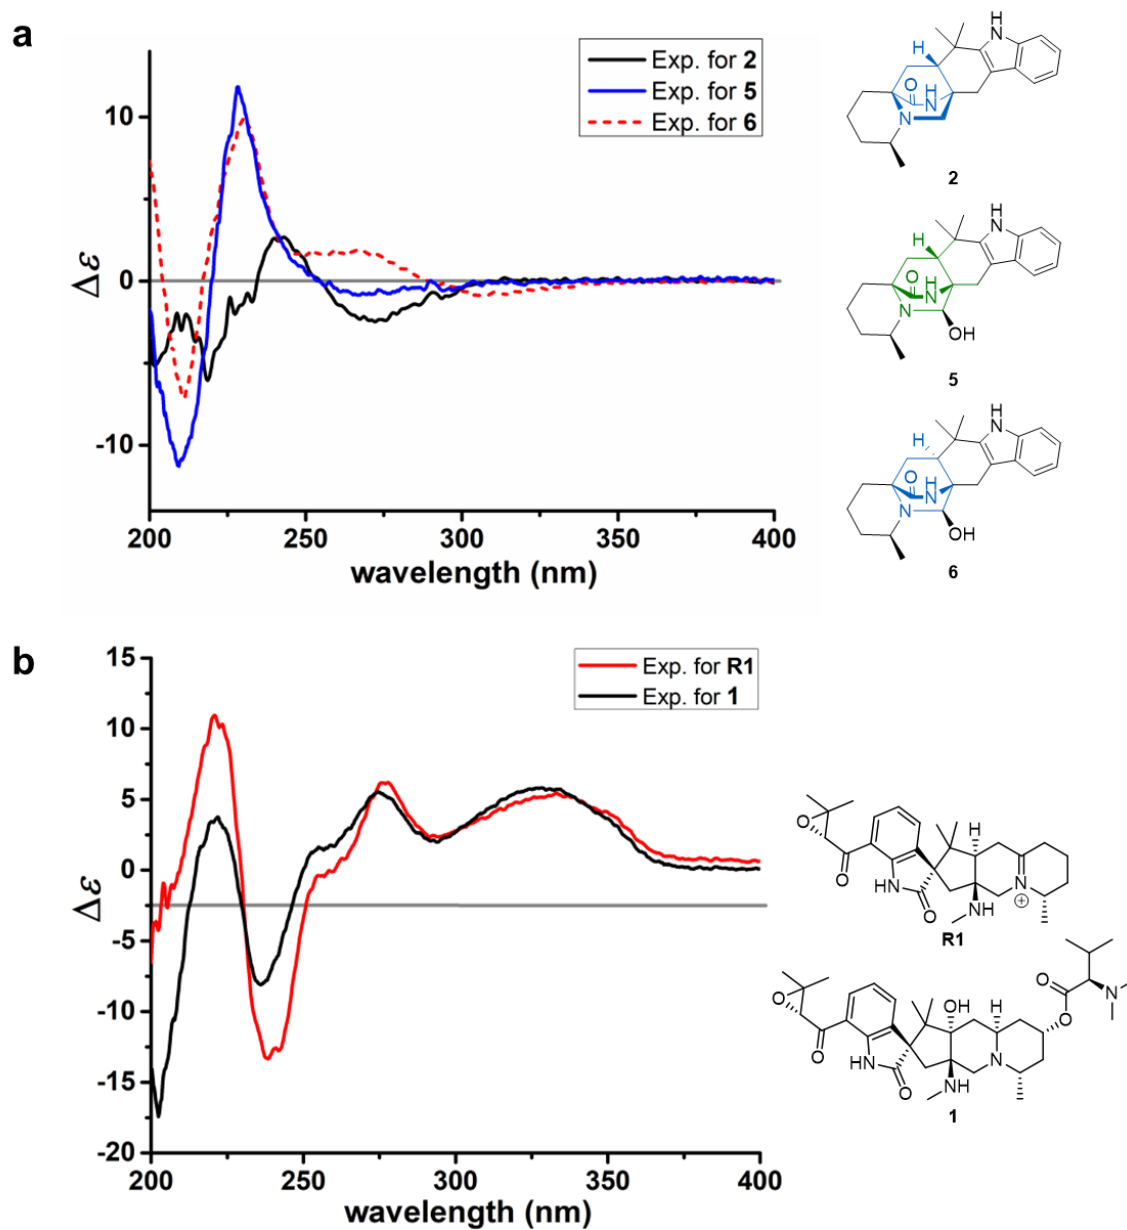

**Supplementary Fig. 6 | Electronic circular dichroism spectra. a, Compounds 2, 5, and 6. b, Compounds R1 and 1.**

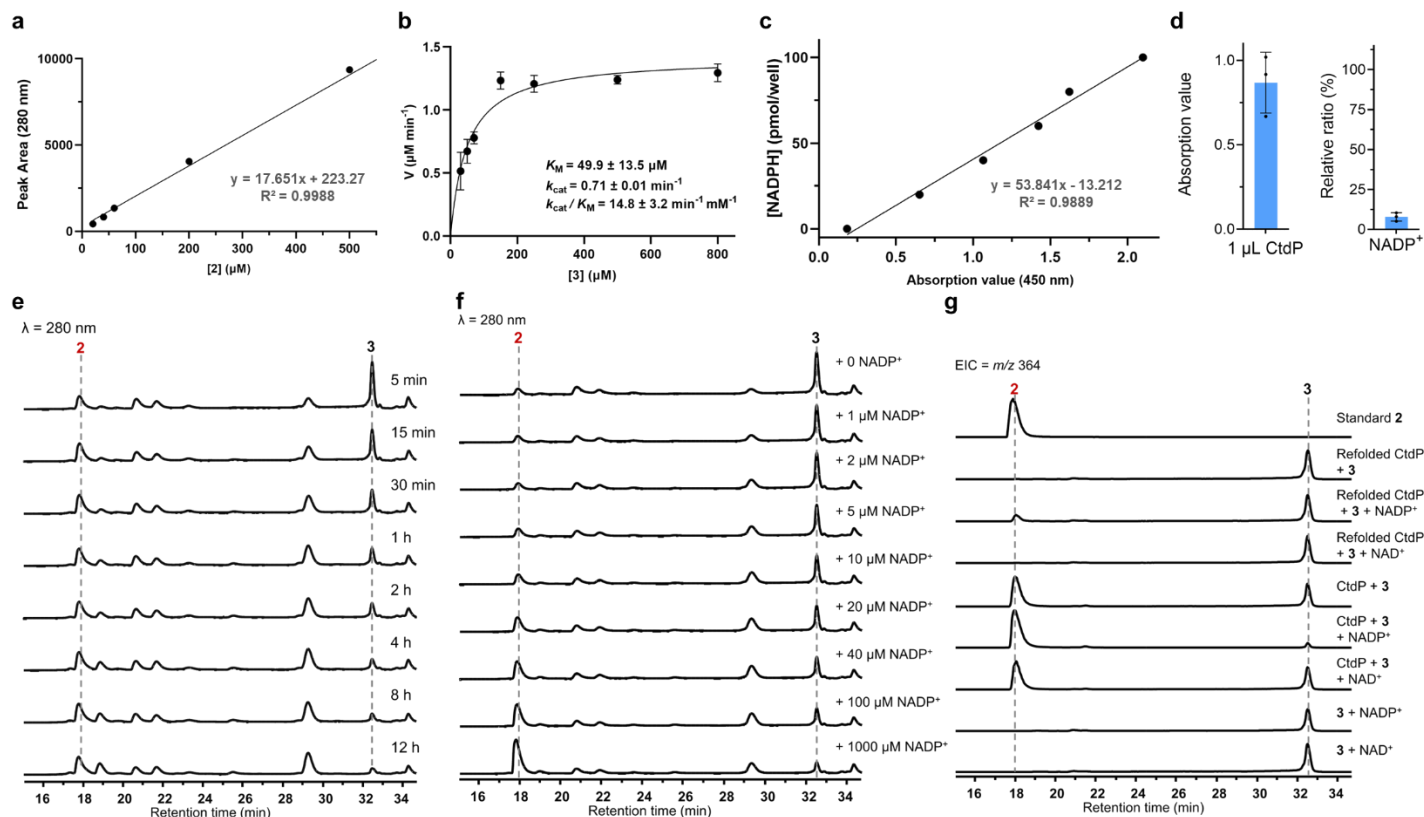

**Supplementary Fig. 7 | Kinetic analysis of CtdP, NADP<sup>+</sup> content in the purified CtdP protein, and refold CtdP assays.** **a**, Standard curve of compound **2**. **b**, Michaelis-Menton kinetic analysis of CtdP with and **3**. Data was presented as mean  $\pm$  s.d. from triplicate independent experiments ( $n = 3$ ). **c**, Standard curve of NADPH. **d**, Left: absorption value of NADP<sup>+</sup> in 1  $\mu\text{L}$  CtdP ( $0.88 \pm 0.18$ ). NADP<sup>+</sup> amount = total NADP – NADPH. Right: the relative ratio of NADP<sup>+</sup> in CtdP protein ( $7.8 \pm 2.6\%$ ). Data was presented as mean  $\pm$  s.d. from triplicate independent experiments ( $n = 3$ ). **e**, 20  $\mu\text{M}$  CtdP (no addition of extra NADP<sup>+</sup>) reacts with 200  $\mu\text{M}$  **3** in time course. The conversion rate reaches a maximum of 33.8% at 30 min. **f**, 10  $\mu\text{M}$  CtdP and 200  $\mu\text{M}$  **3** react with the addition of different concentrations of NADP<sup>+</sup> for 15 min. The conversion rate of **2** increased from 10.4% to 63.9% with the increased amount of additional NADP<sup>+</sup> from 0 to 1000  $\mu\text{M}$ . **g**, CtdP (40  $\mu\text{M}$ ) and refolded CtdP (40  $\mu\text{M}$ ) react with **3** (200  $\mu\text{M}$ ) for 1 hour, respectively. The reaction buffer is 50 mM Tris-HCl (pH 7.0) and the reaction temperature is 28  $^\circ\text{C}$ . The 100% conversion of **2** as the control.



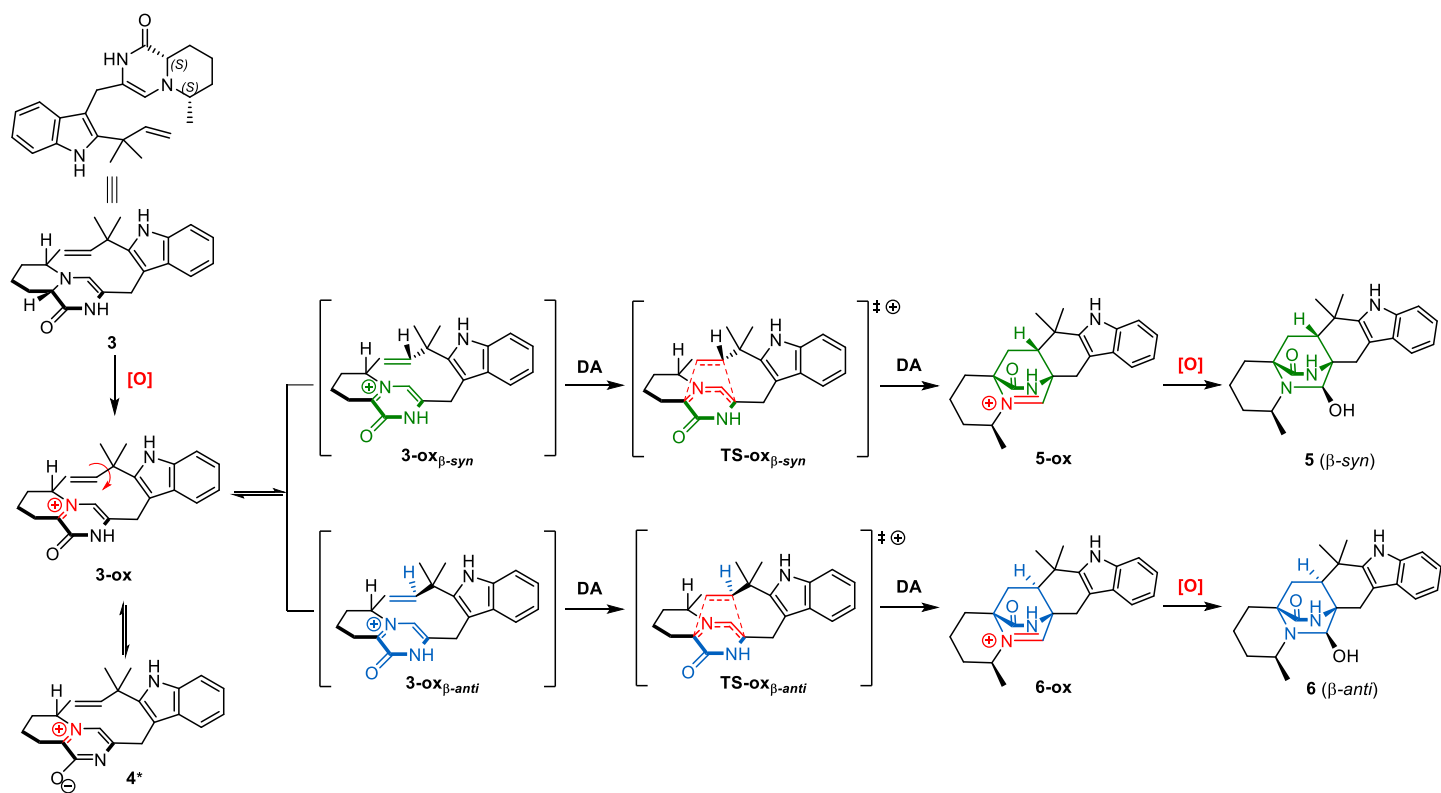

**Supplementary Fig. 8 | The proposed pathways of spontaneous Diels-Alder reactions of compound 3.**

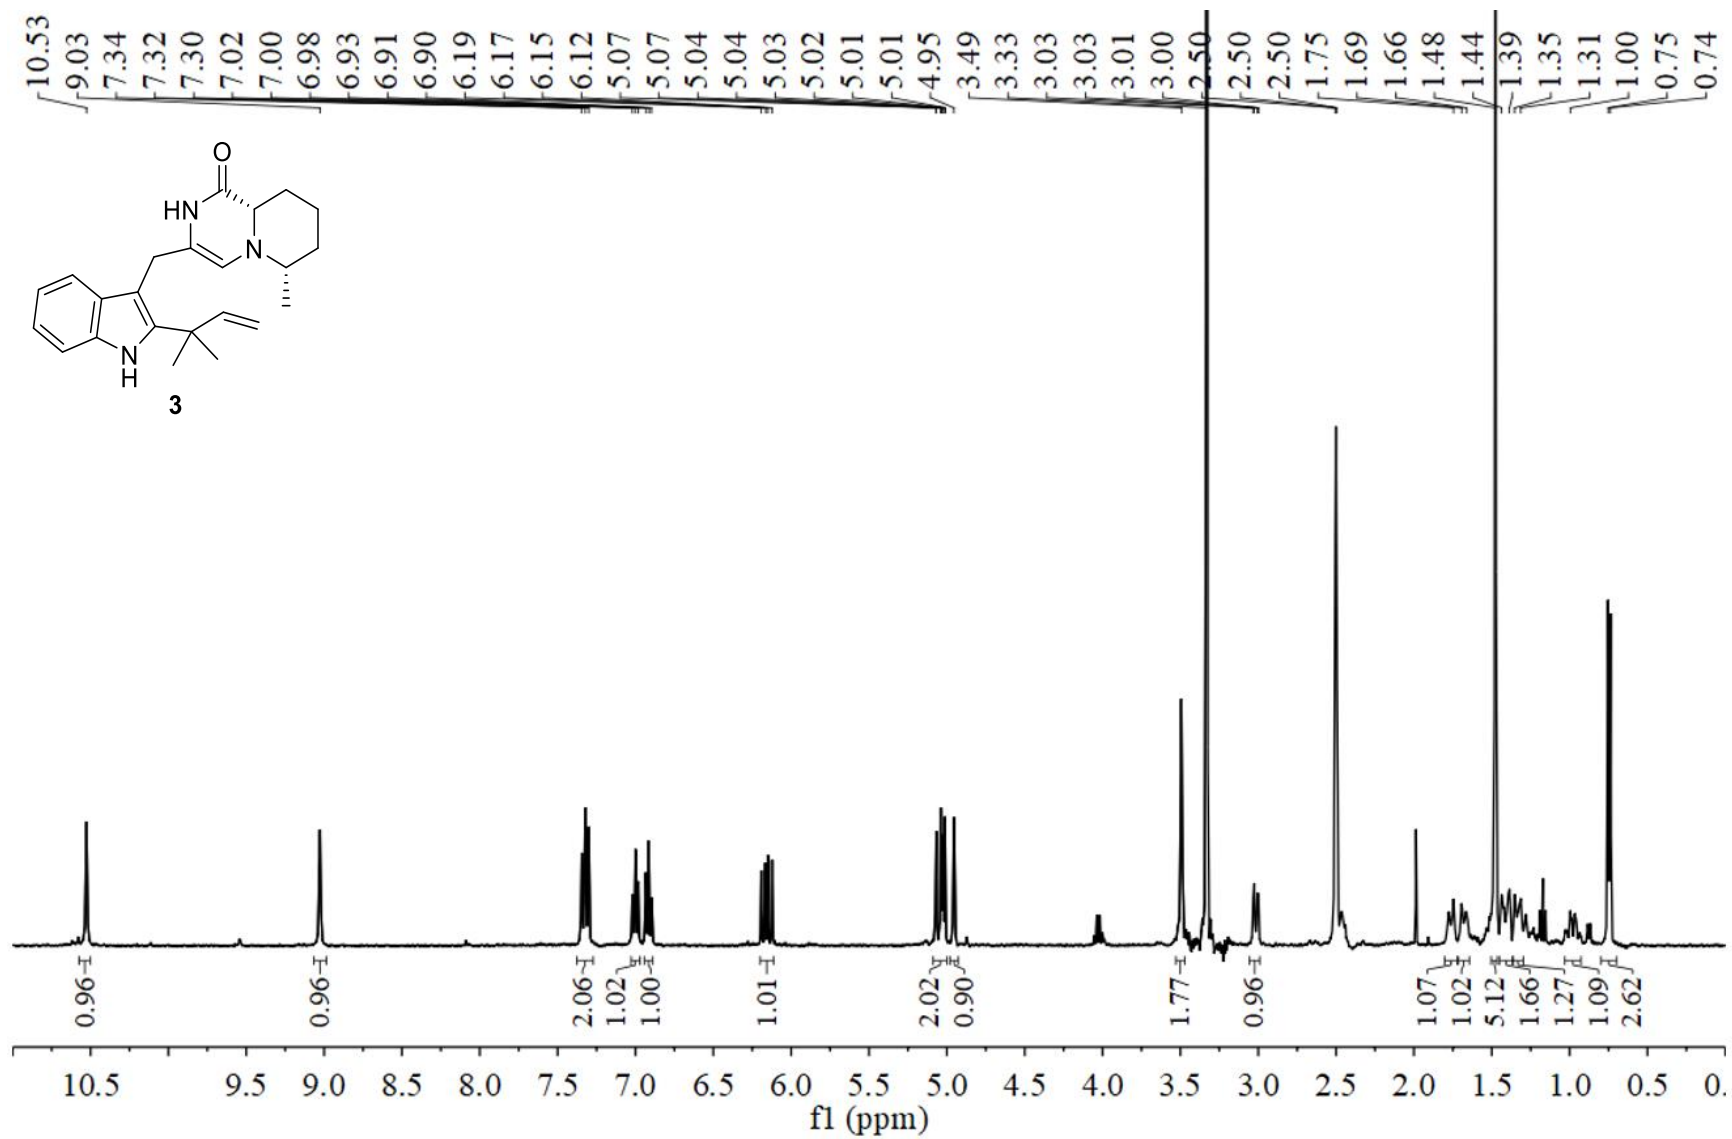

Supplementary Fig. 9-1 | <sup>1</sup>H NMR spectrum of 3 in DMSO-*d*<sub>6</sub>.

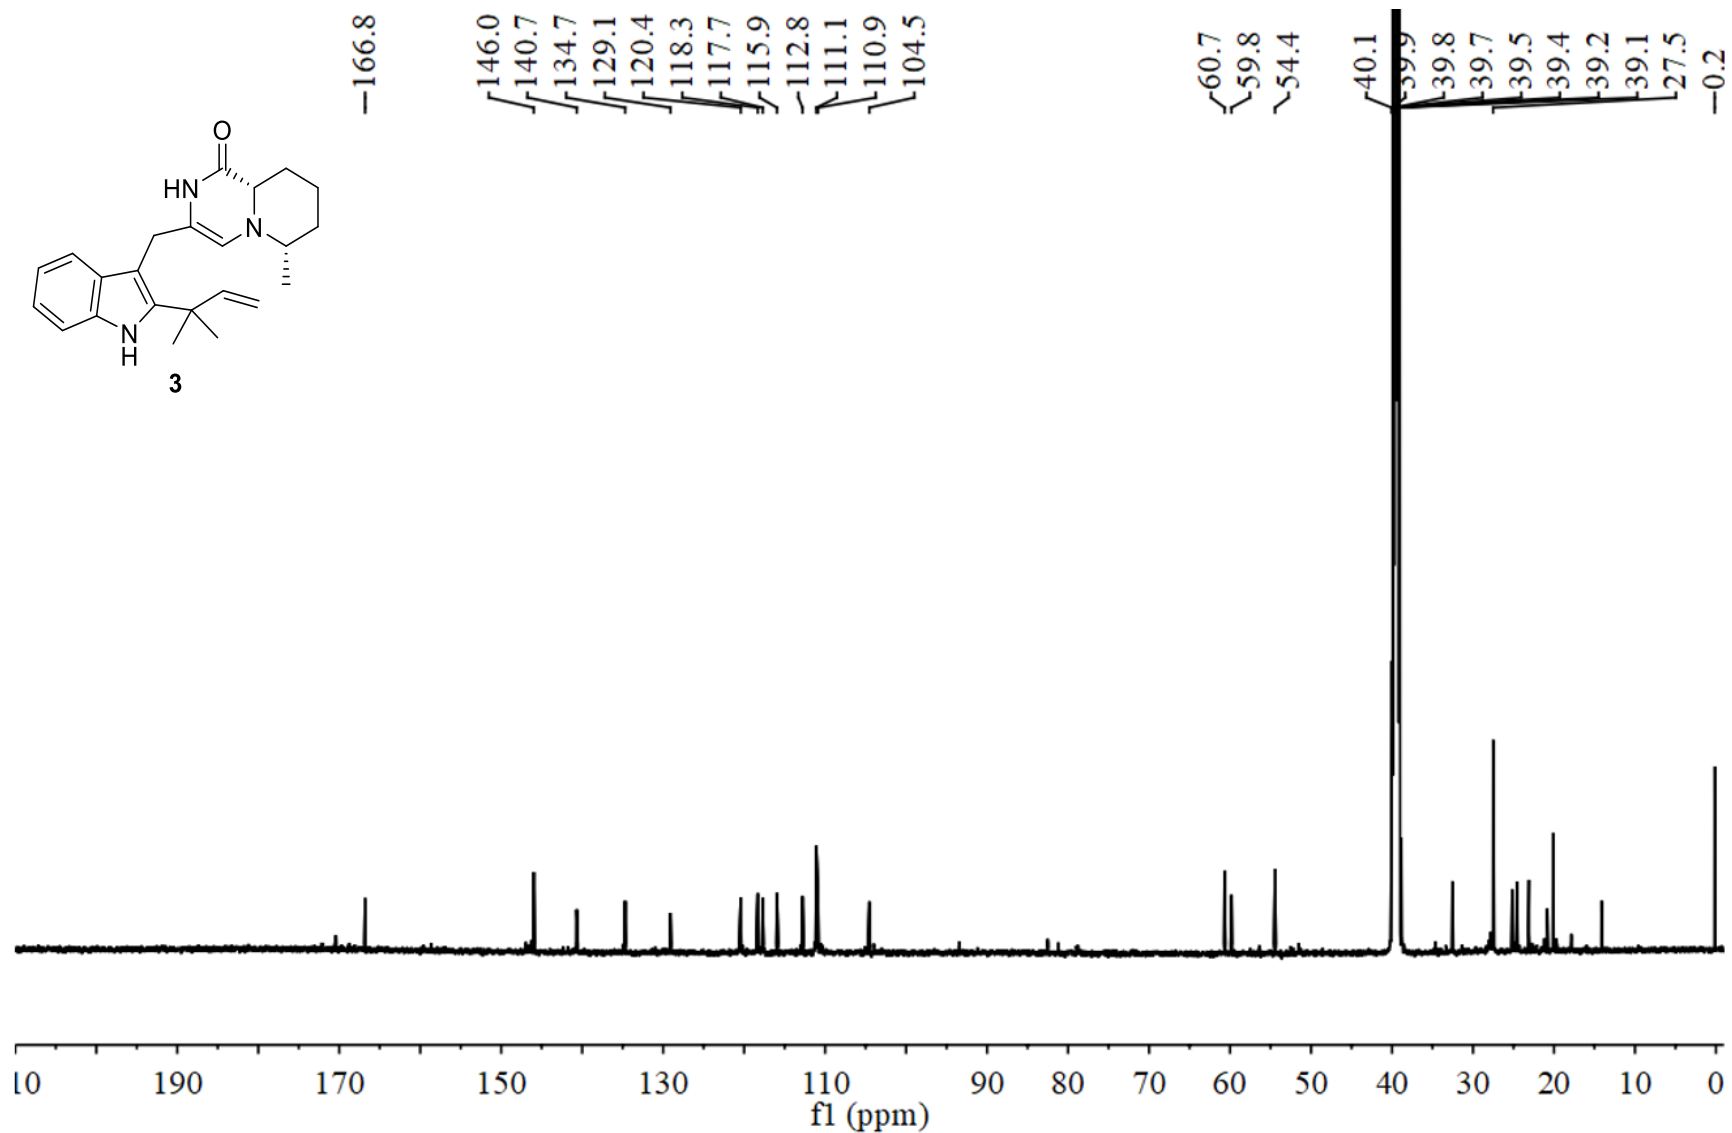

Supplementary Fig. 9-2 |  $^{13}\text{C}$  NMR spectrum of 3 in  $\text{DMSO-}d_6$ .

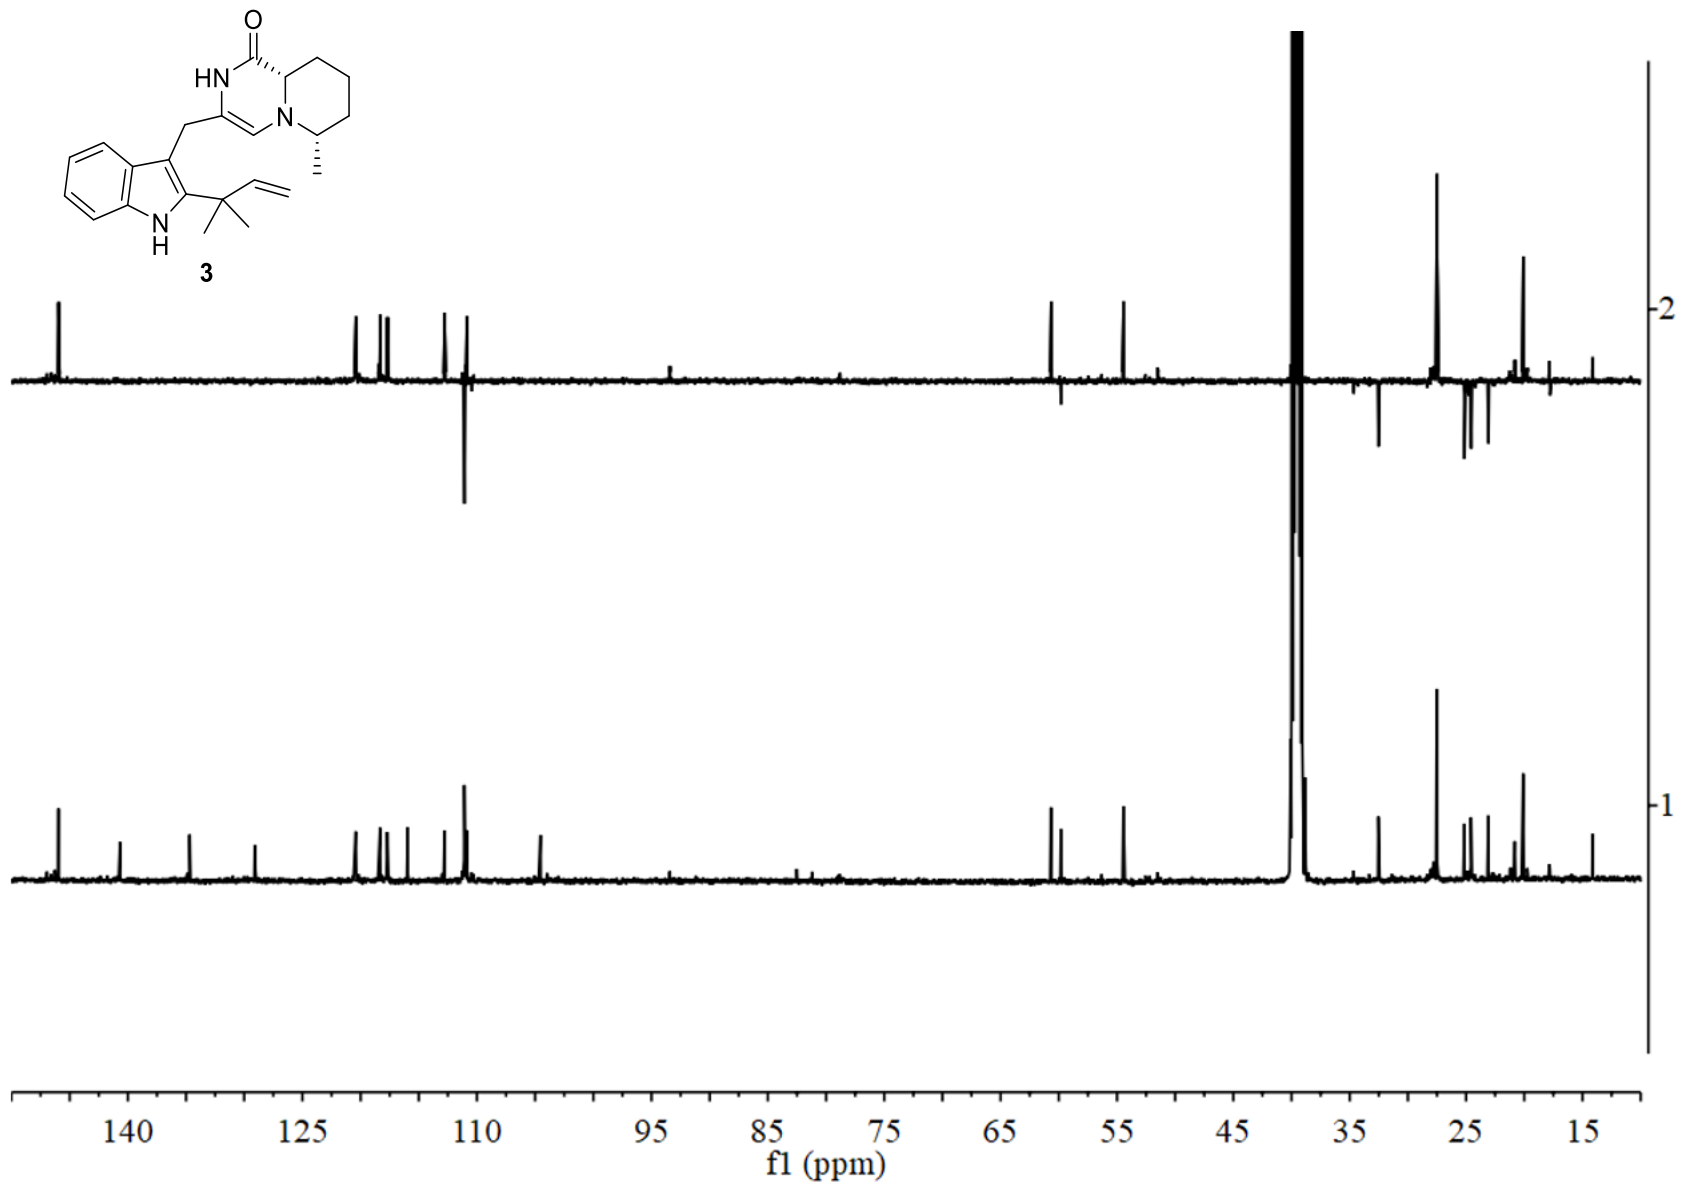

Supplementary Fig. 9-3 | DEPT135 and <sup>13</sup>C NMR spectra of 3 in DMSO-*d*<sub>6</sub>.

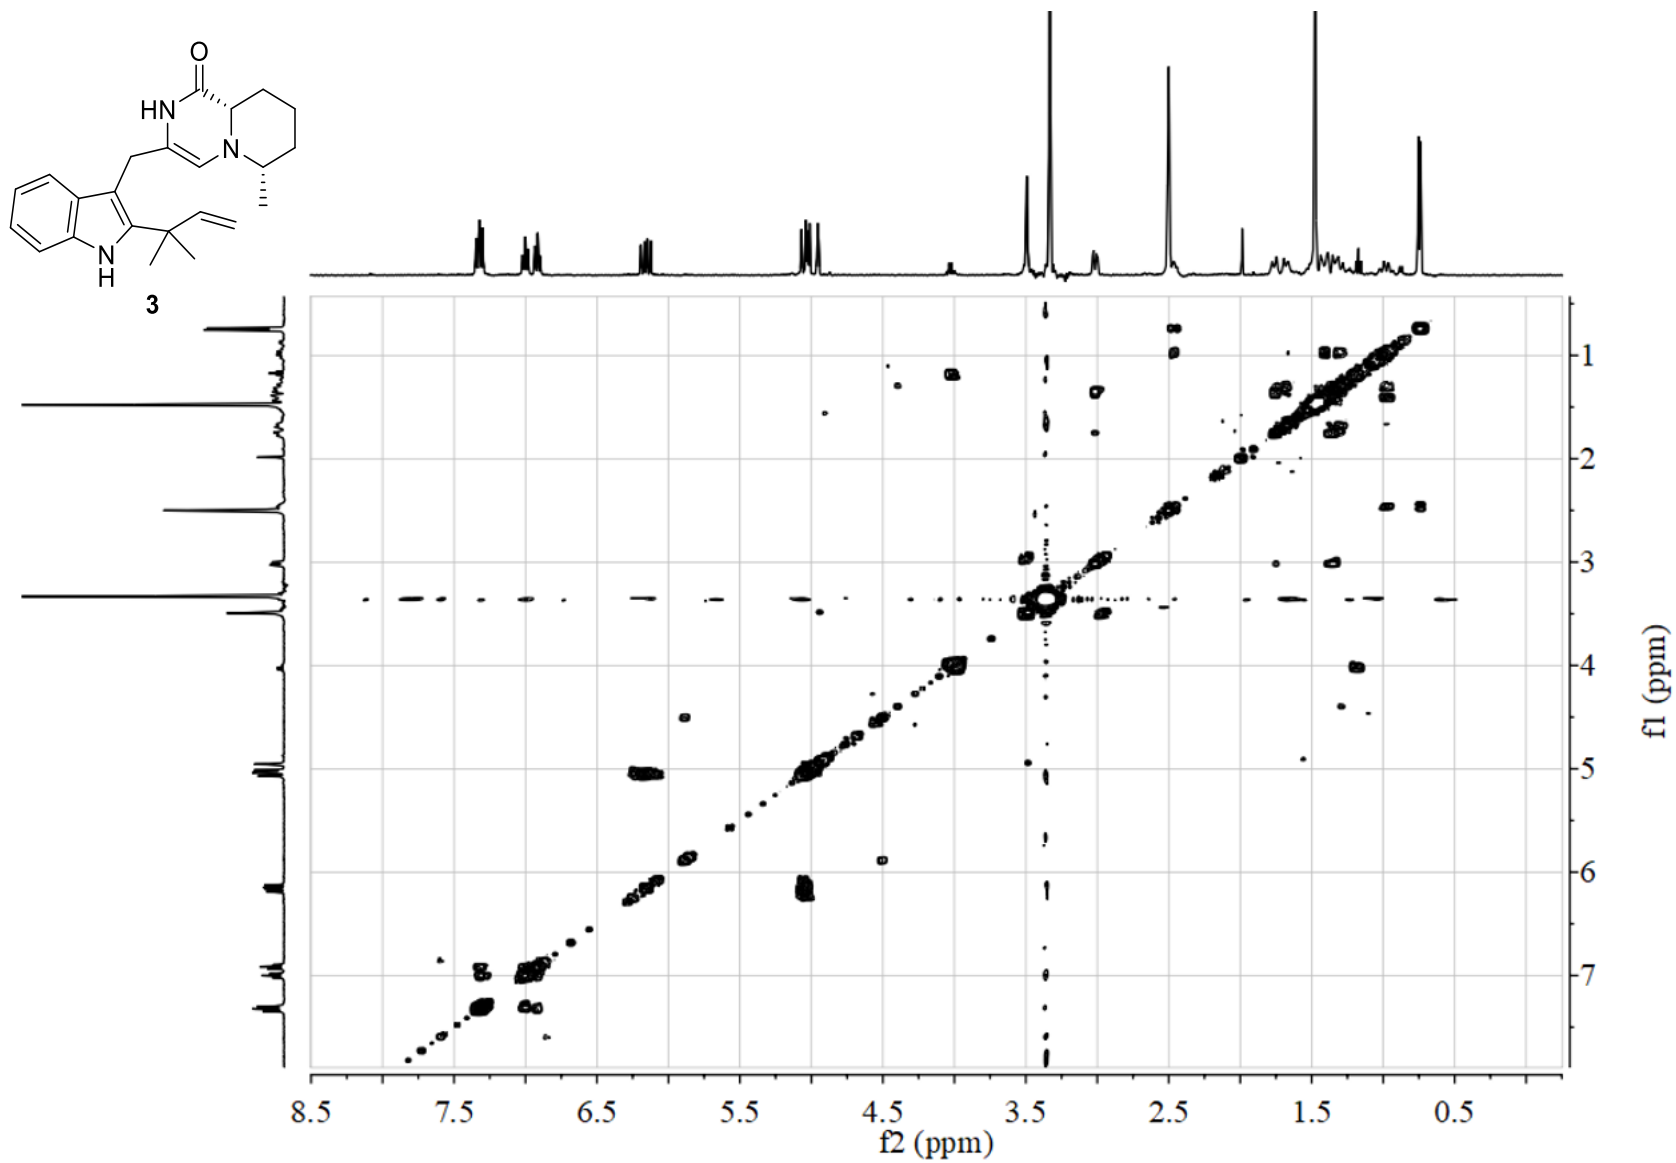

Supplementary Fig. 9-4 |  $^1\text{H}$ - $^1\text{H}$  COSY NMR spectrum of **3** in  $\text{DMSO-}d_6$ .

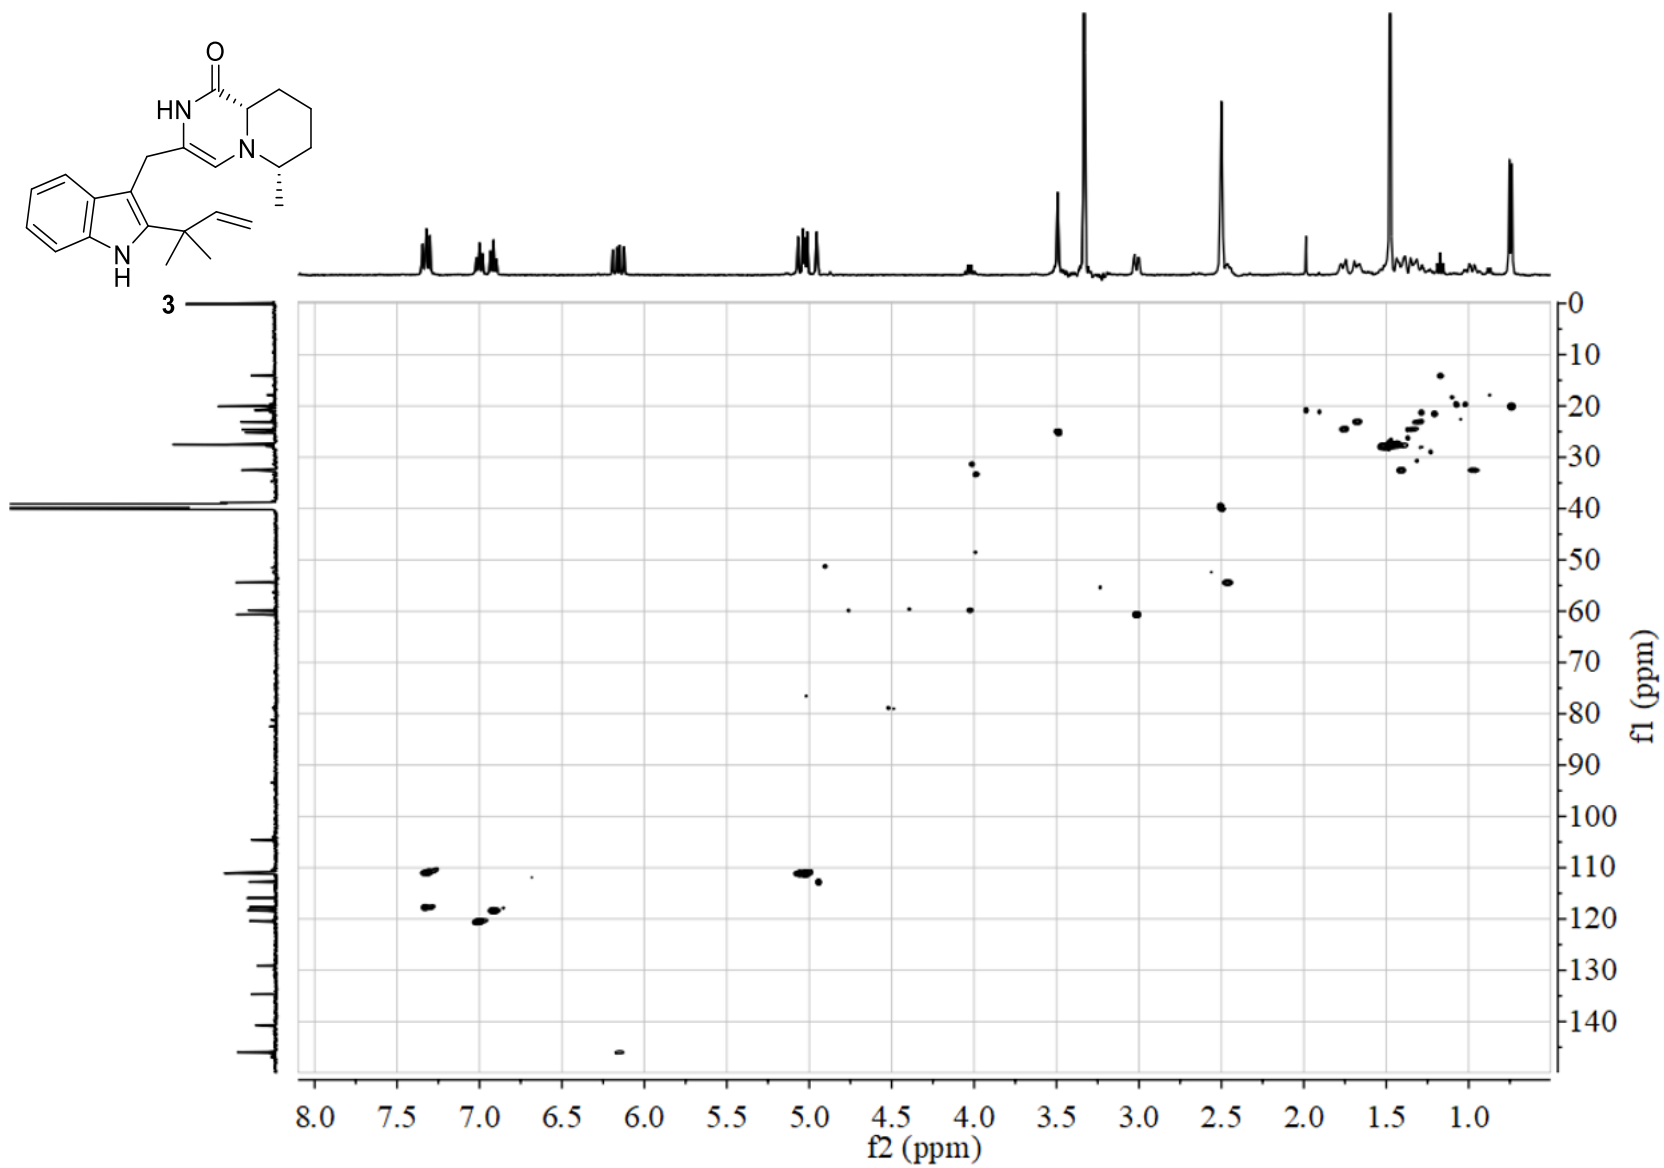

Supplementary Fig. 9-5 | HSQC NMR spectrum of 3 in DMSO-*d*<sub>6</sub>.

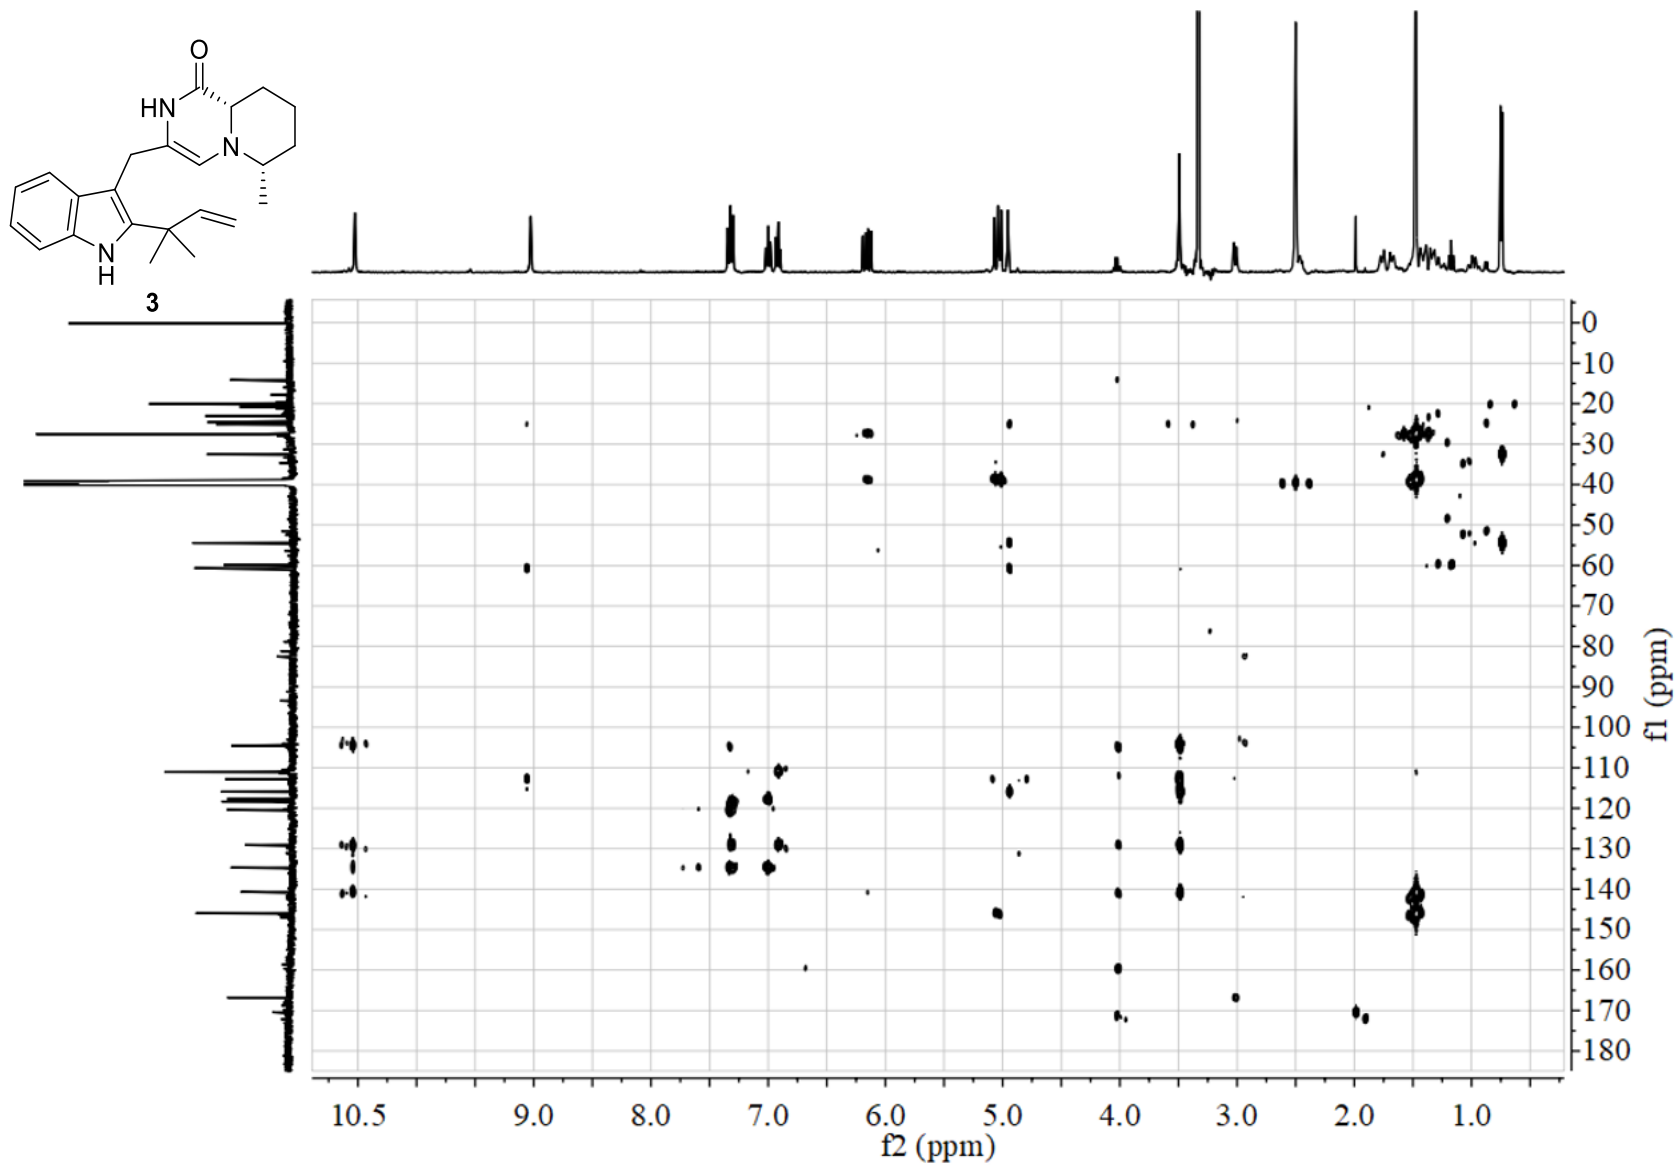

Supplementary Fig. 9-6 | HMBC NMR spectrum of **3** in DMSO-*d*<sub>6</sub>.

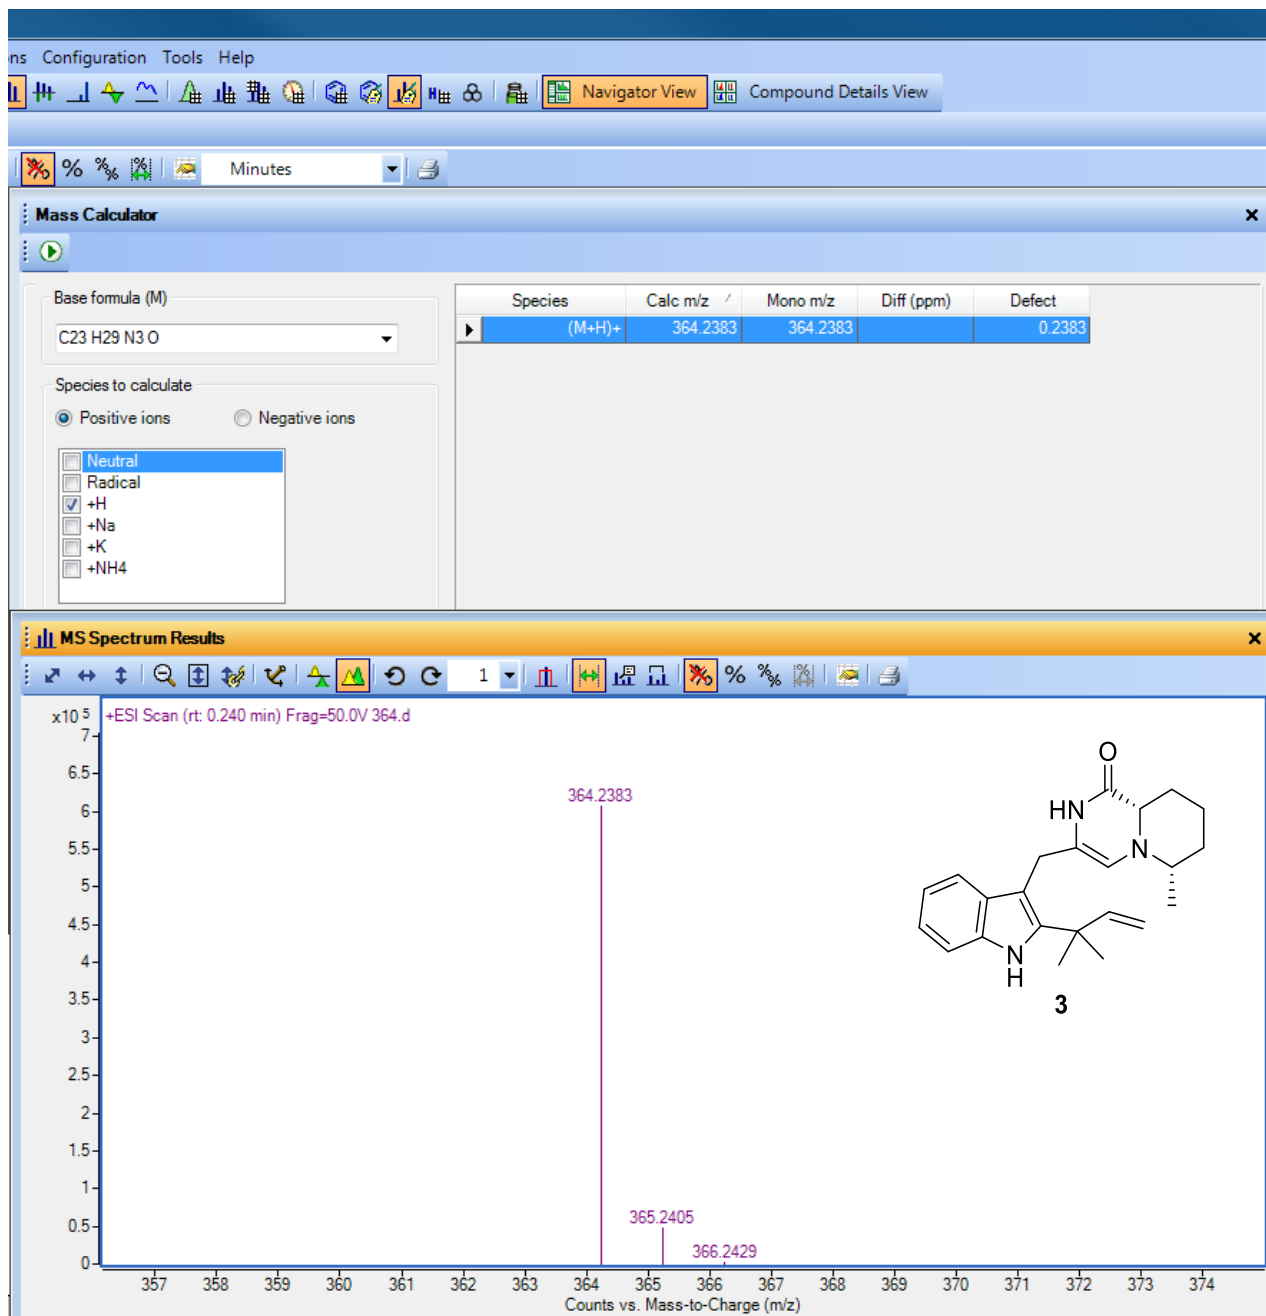

Supplementary Fig. 9-7 | HRMS spectrum of 3.



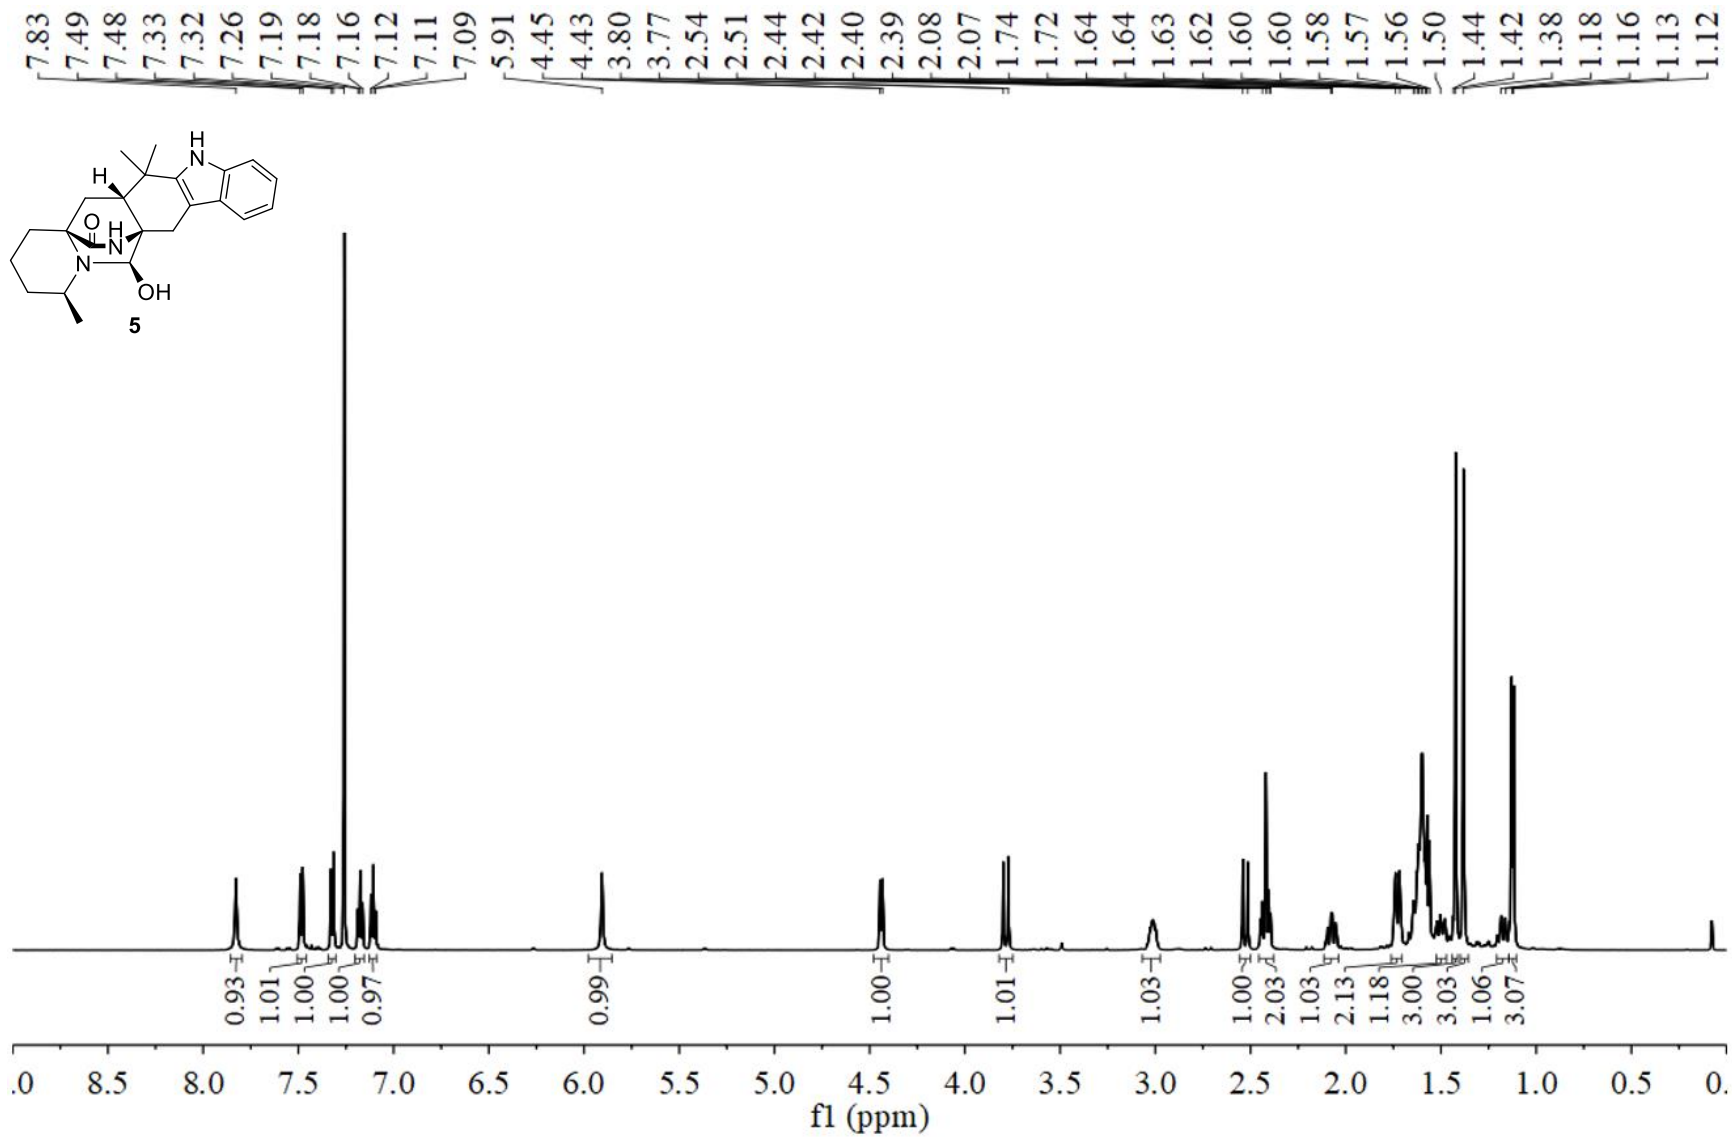

Supplementary Fig. 10-1 |  $^1\text{H}$  NMR spectrum of 5 in  $\text{CDCl}_3$ .

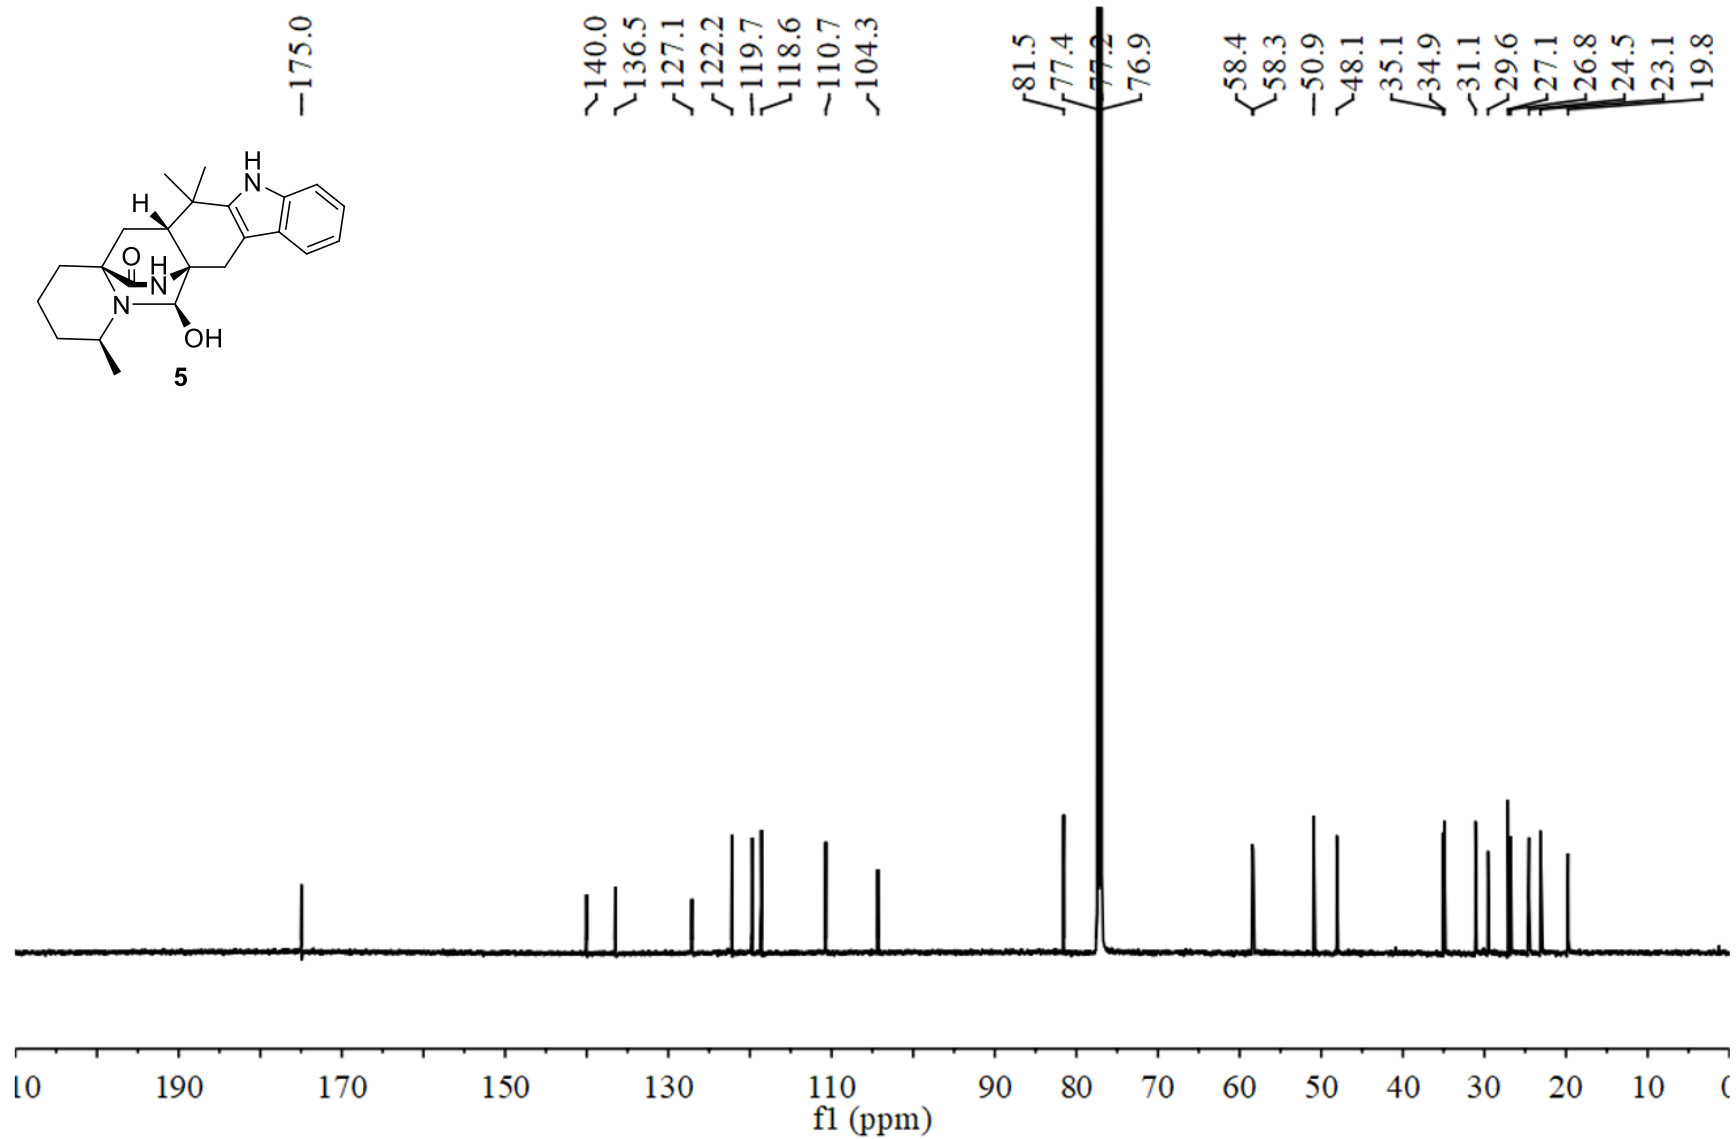

Supplementary Fig. 10-2 | <sup>13</sup>C NMR spectrum of 5 in CDCl<sub>3</sub>.

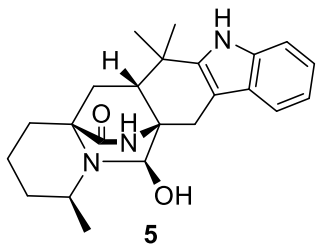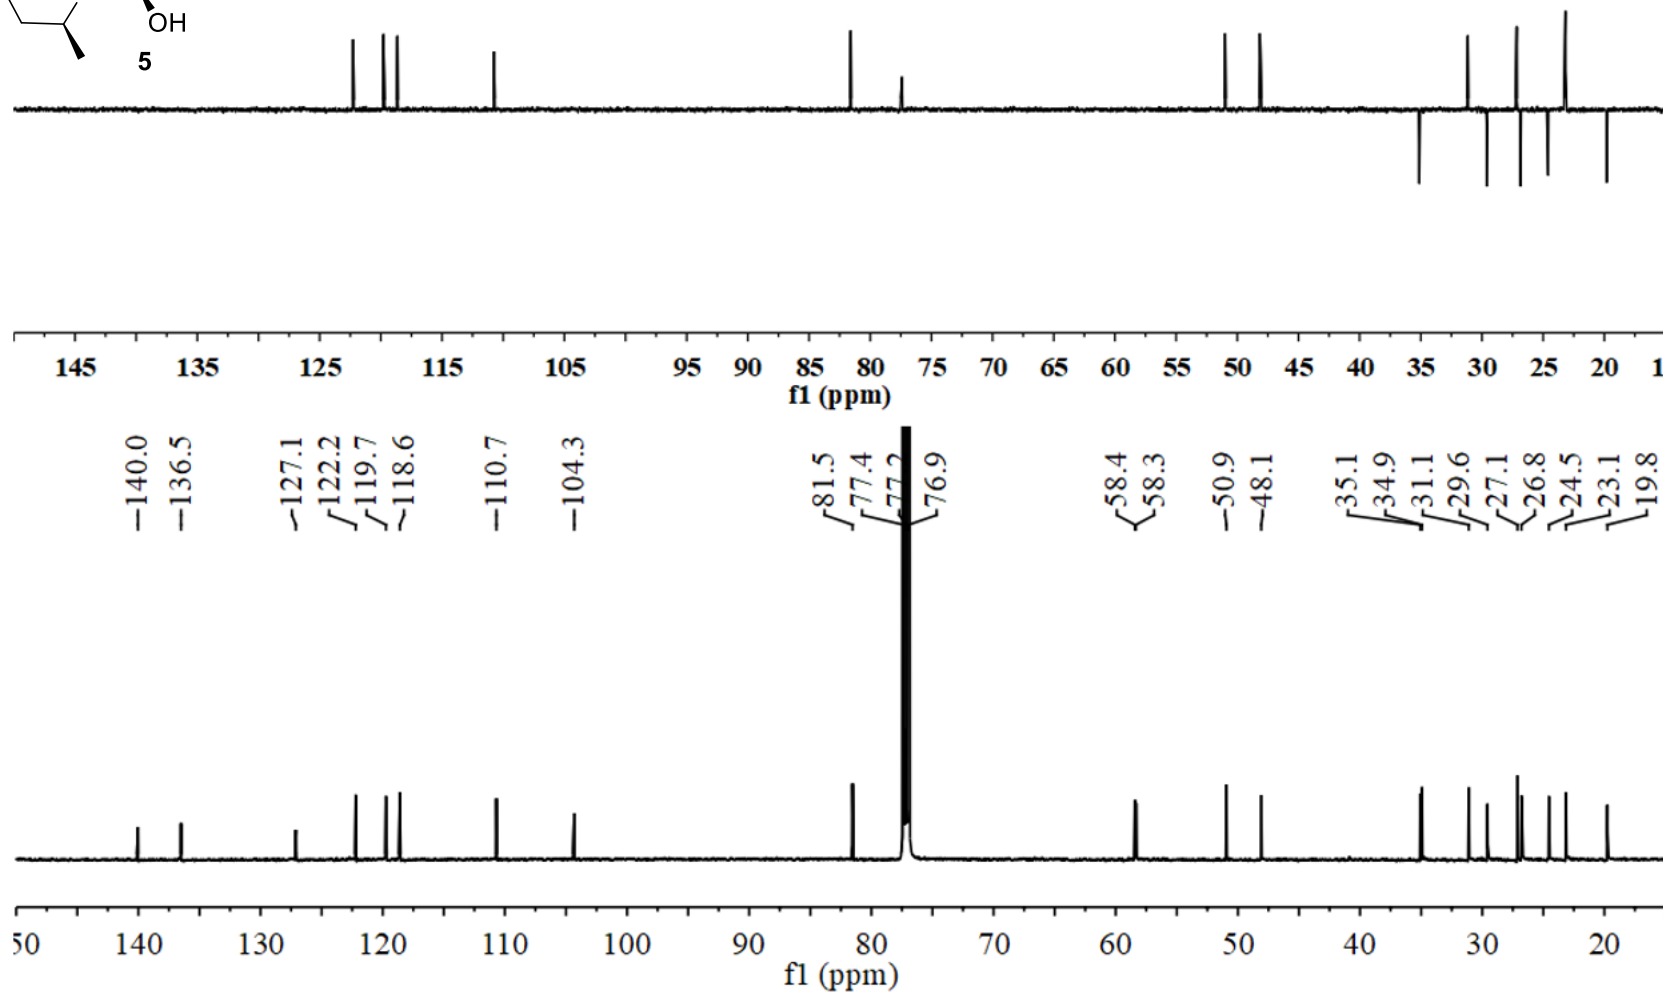

Supplementary Fig. 10-3 | DEPT135 and  $^{13}\text{C}$  NMR spectra of 5 in  $\text{CDCl}_3$ .

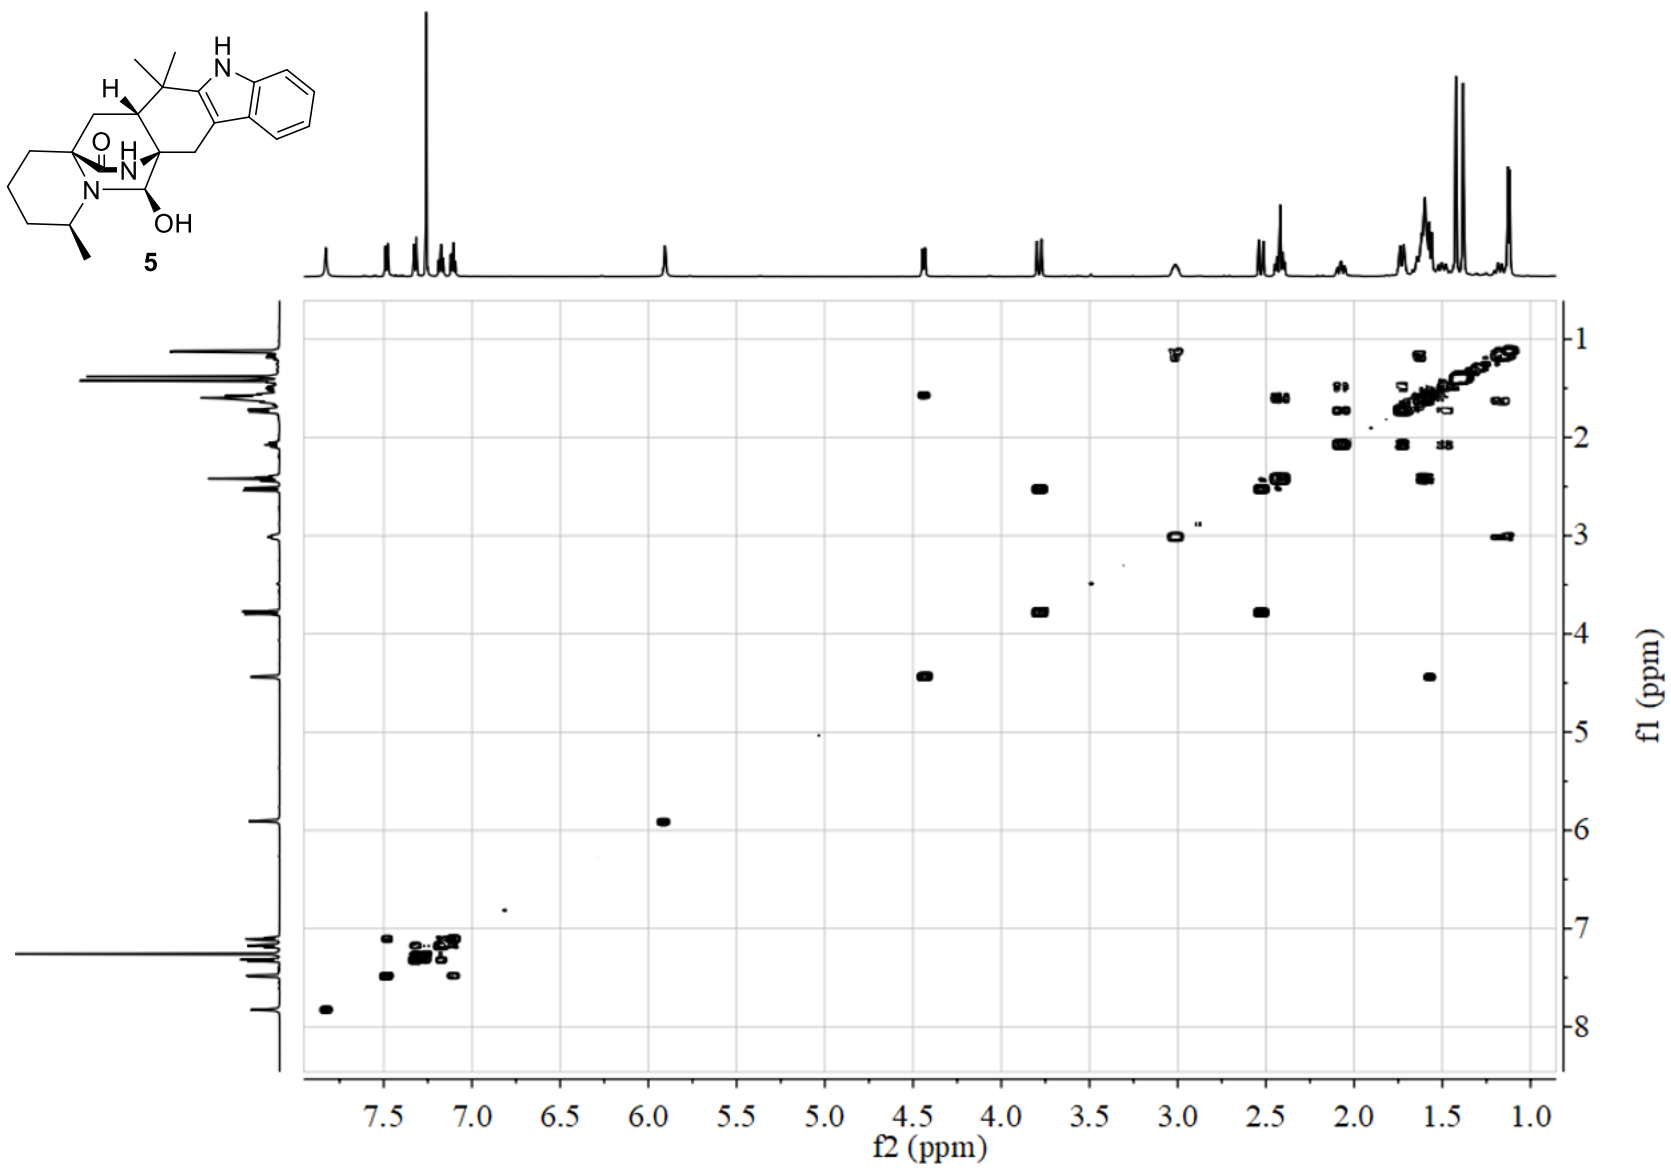

Supplementary Fig. 10-4 |  $^1\text{H}$ - $^1\text{H}$  COSY NMR spectrum of 5 in  $\text{CDCl}_3$ .

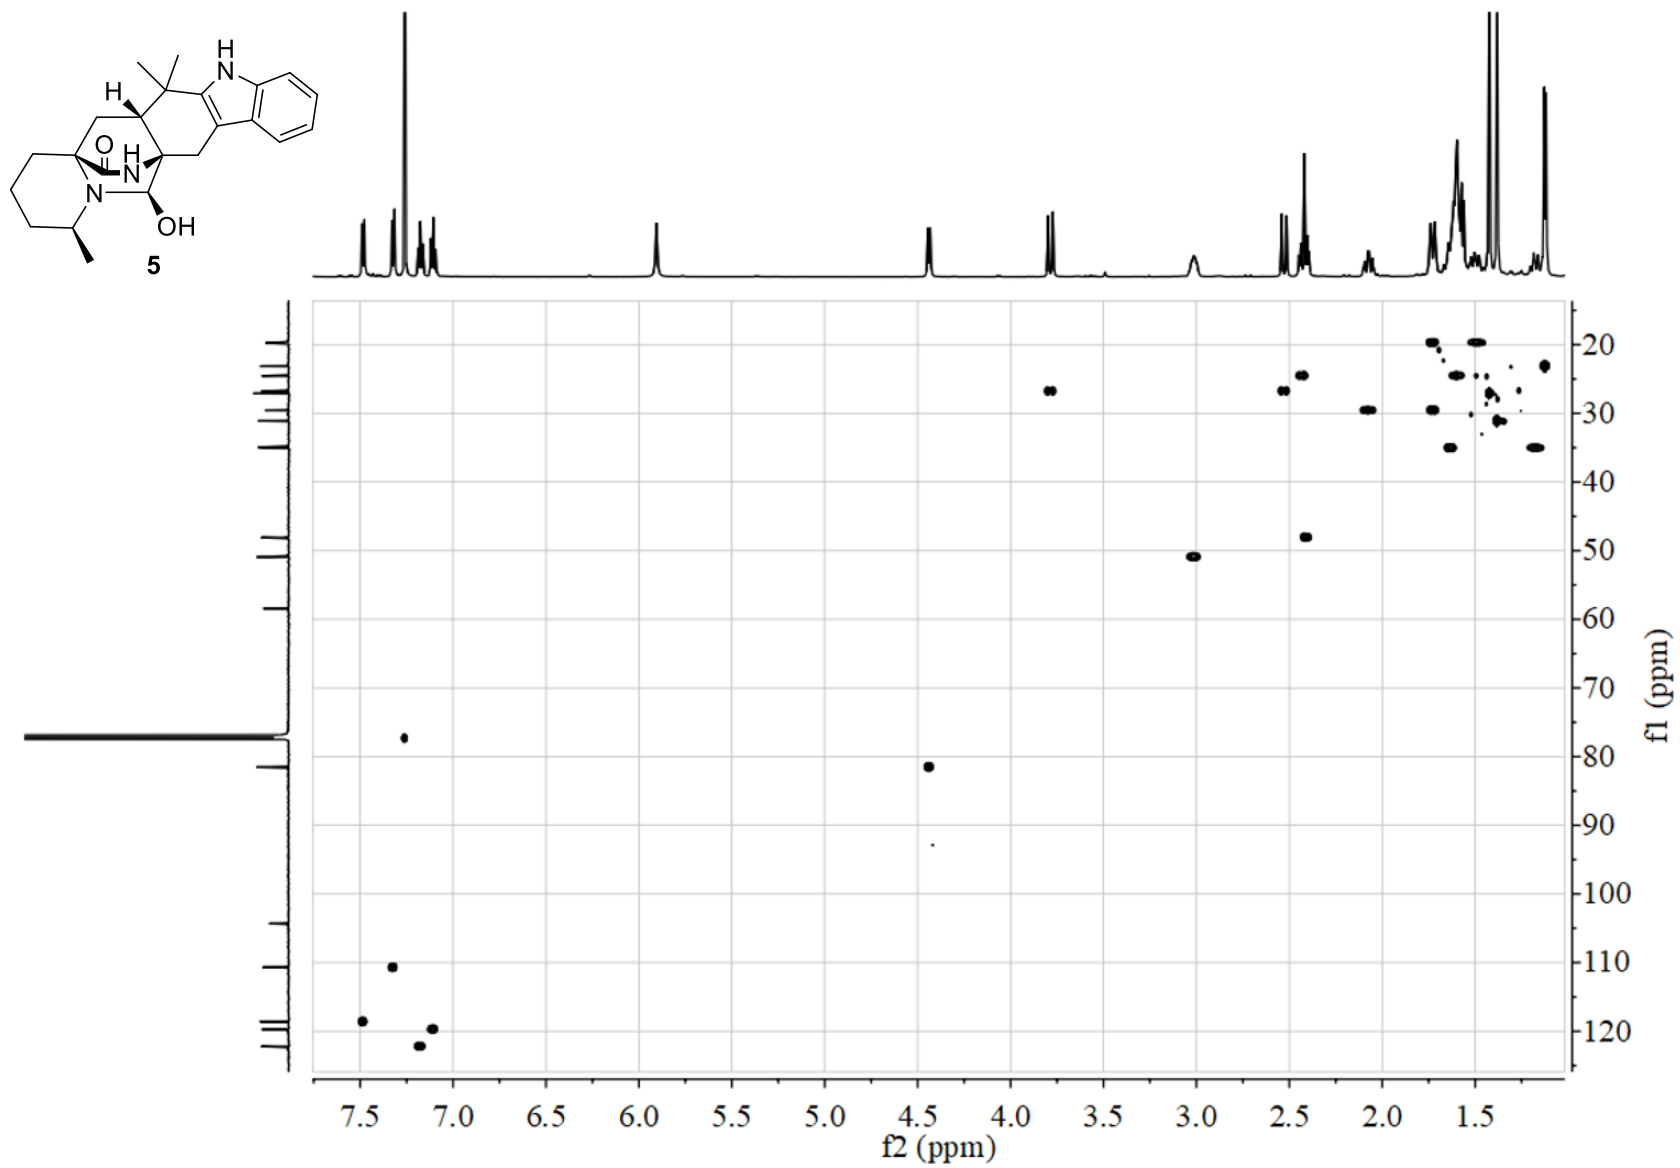

Supplementary Fig. 10-5 | HSQC NMR spectrum of 5 in CDCl<sub>3</sub>.

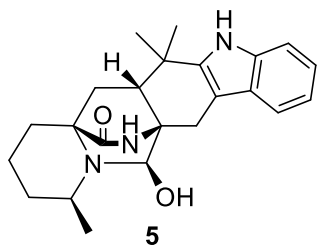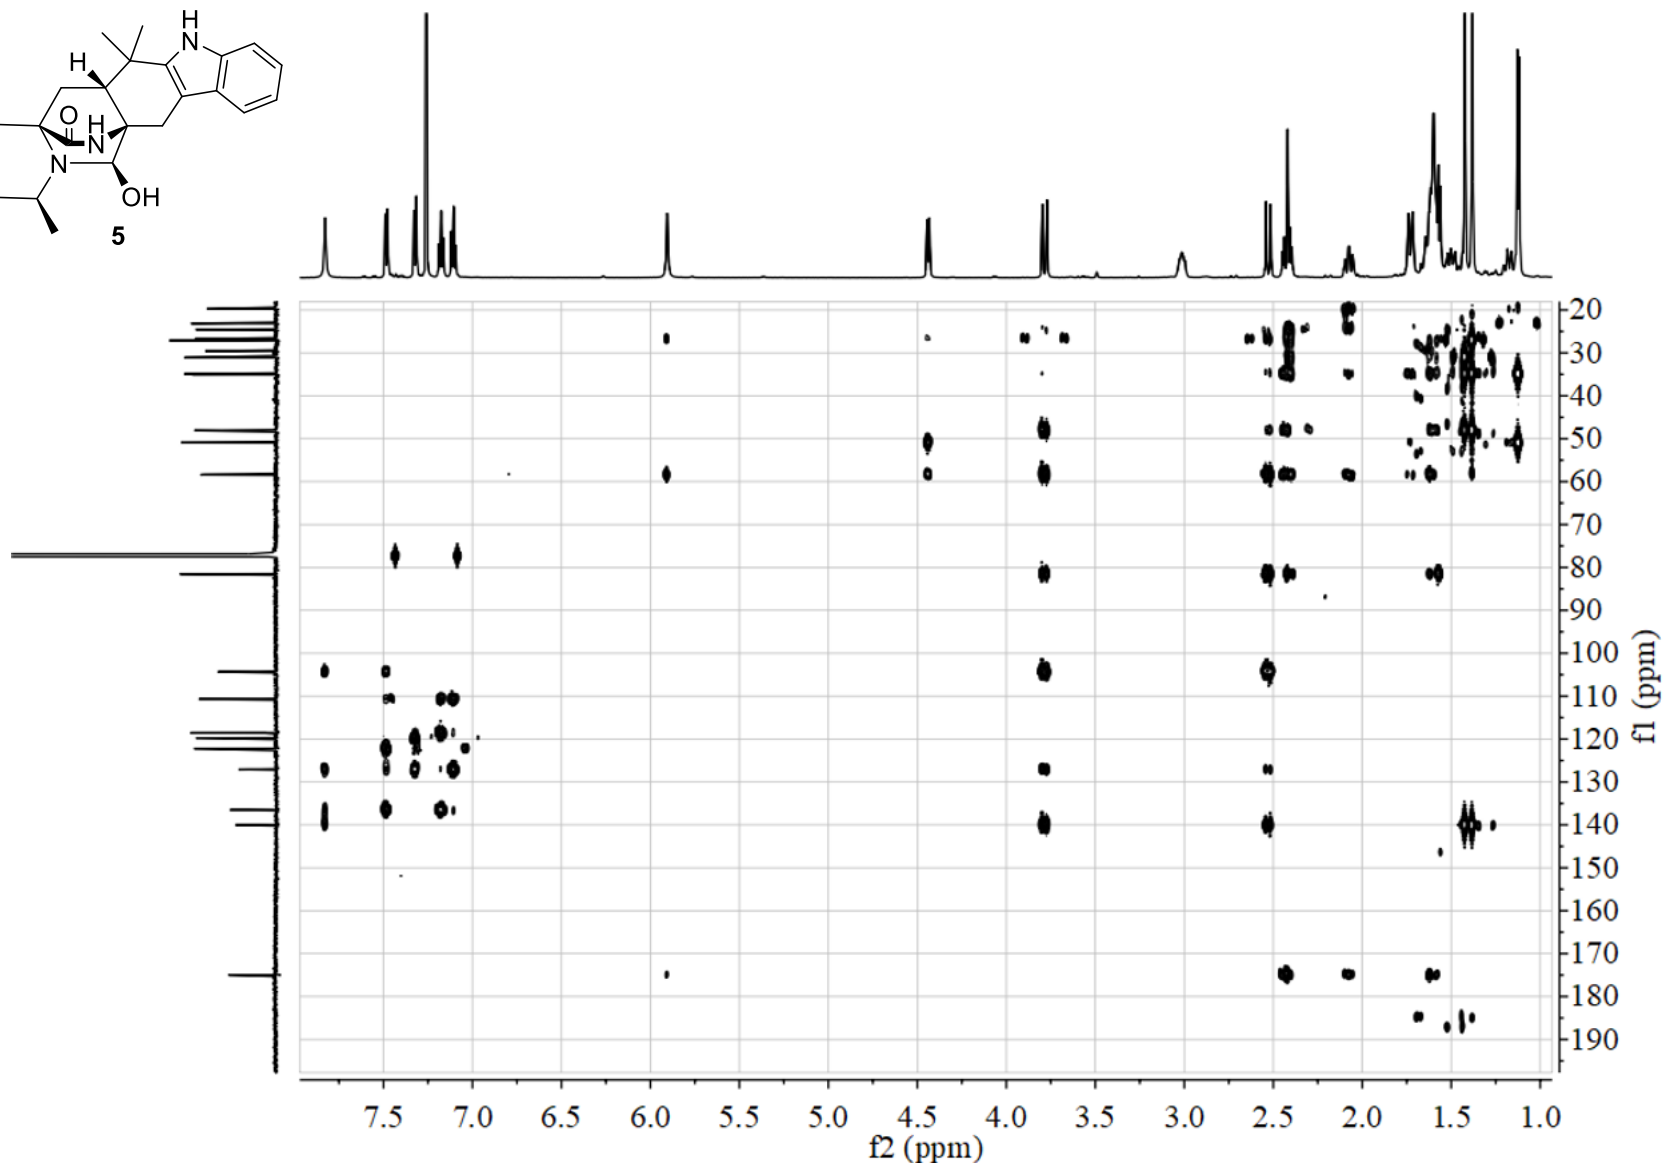

Supplementary Fig. 10-6 | HMBC NMR spectrum of 5 in CDCl<sub>3</sub>.

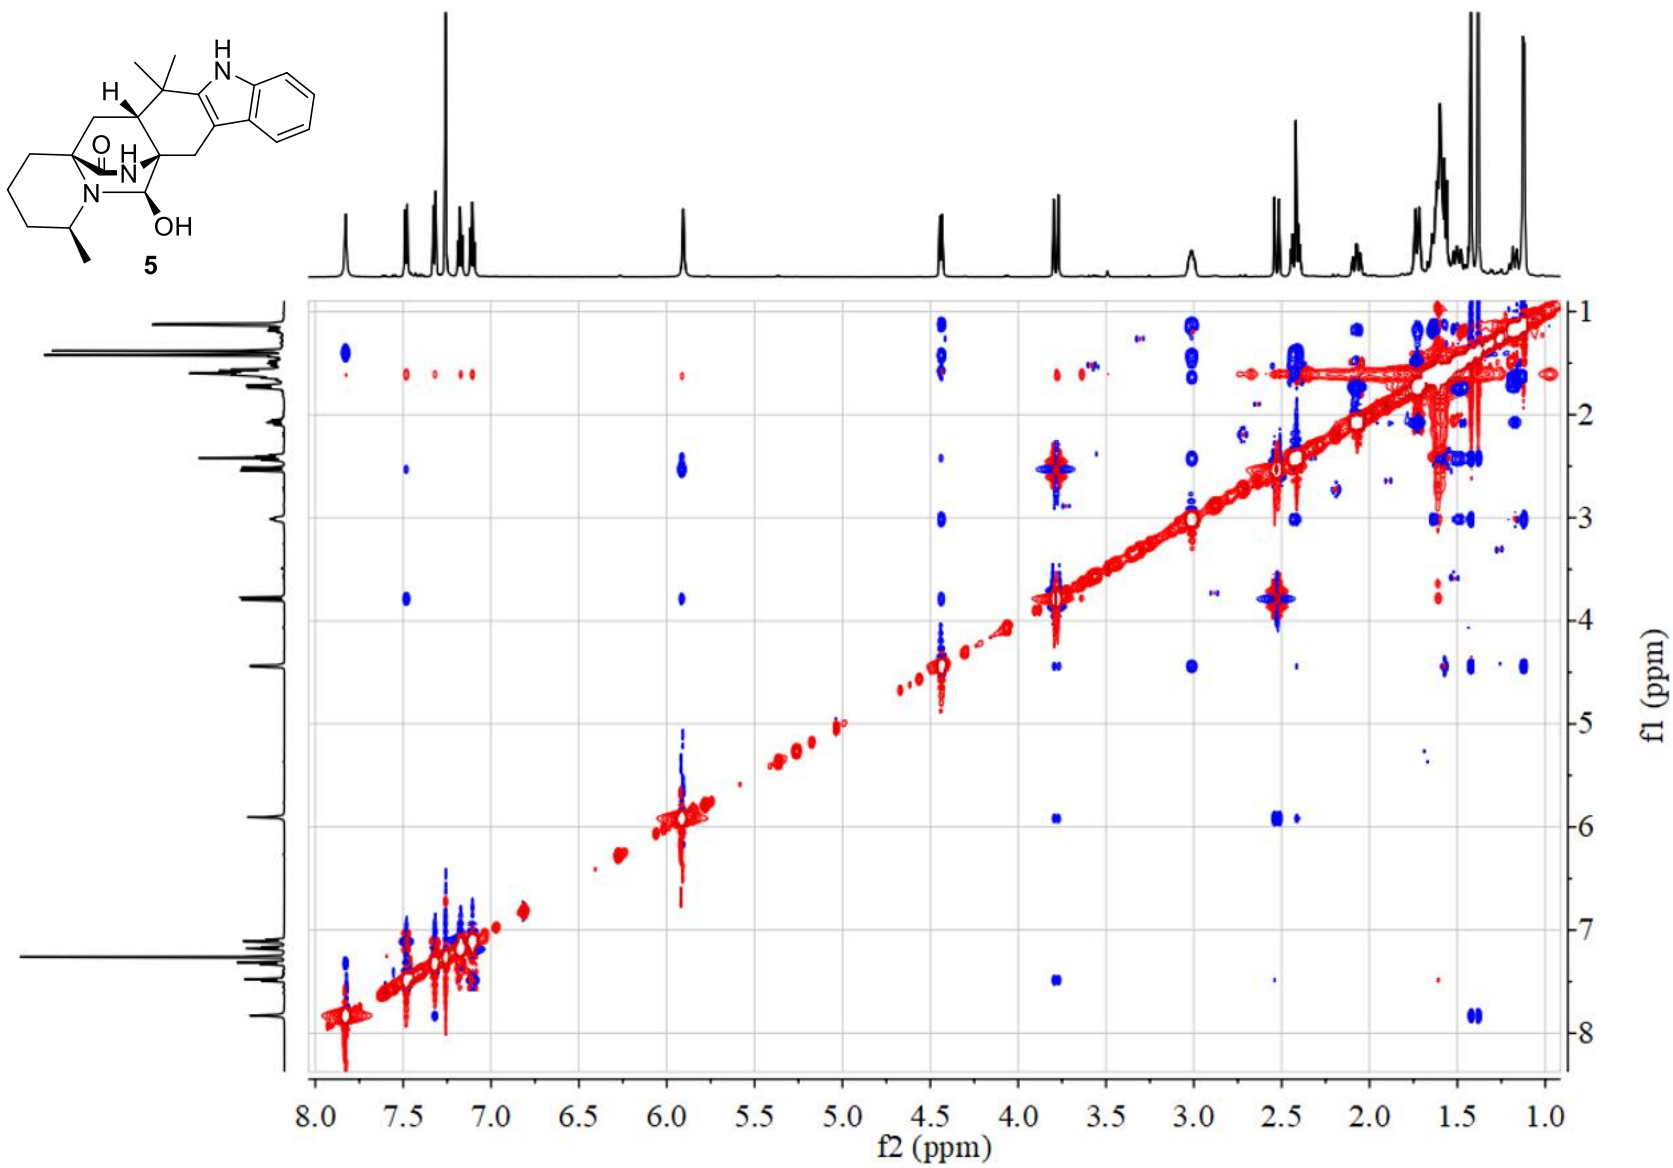

Supplementary Fig. 10-7 | NOESY NMR spectrum of 5 in CDCl<sub>3</sub>.

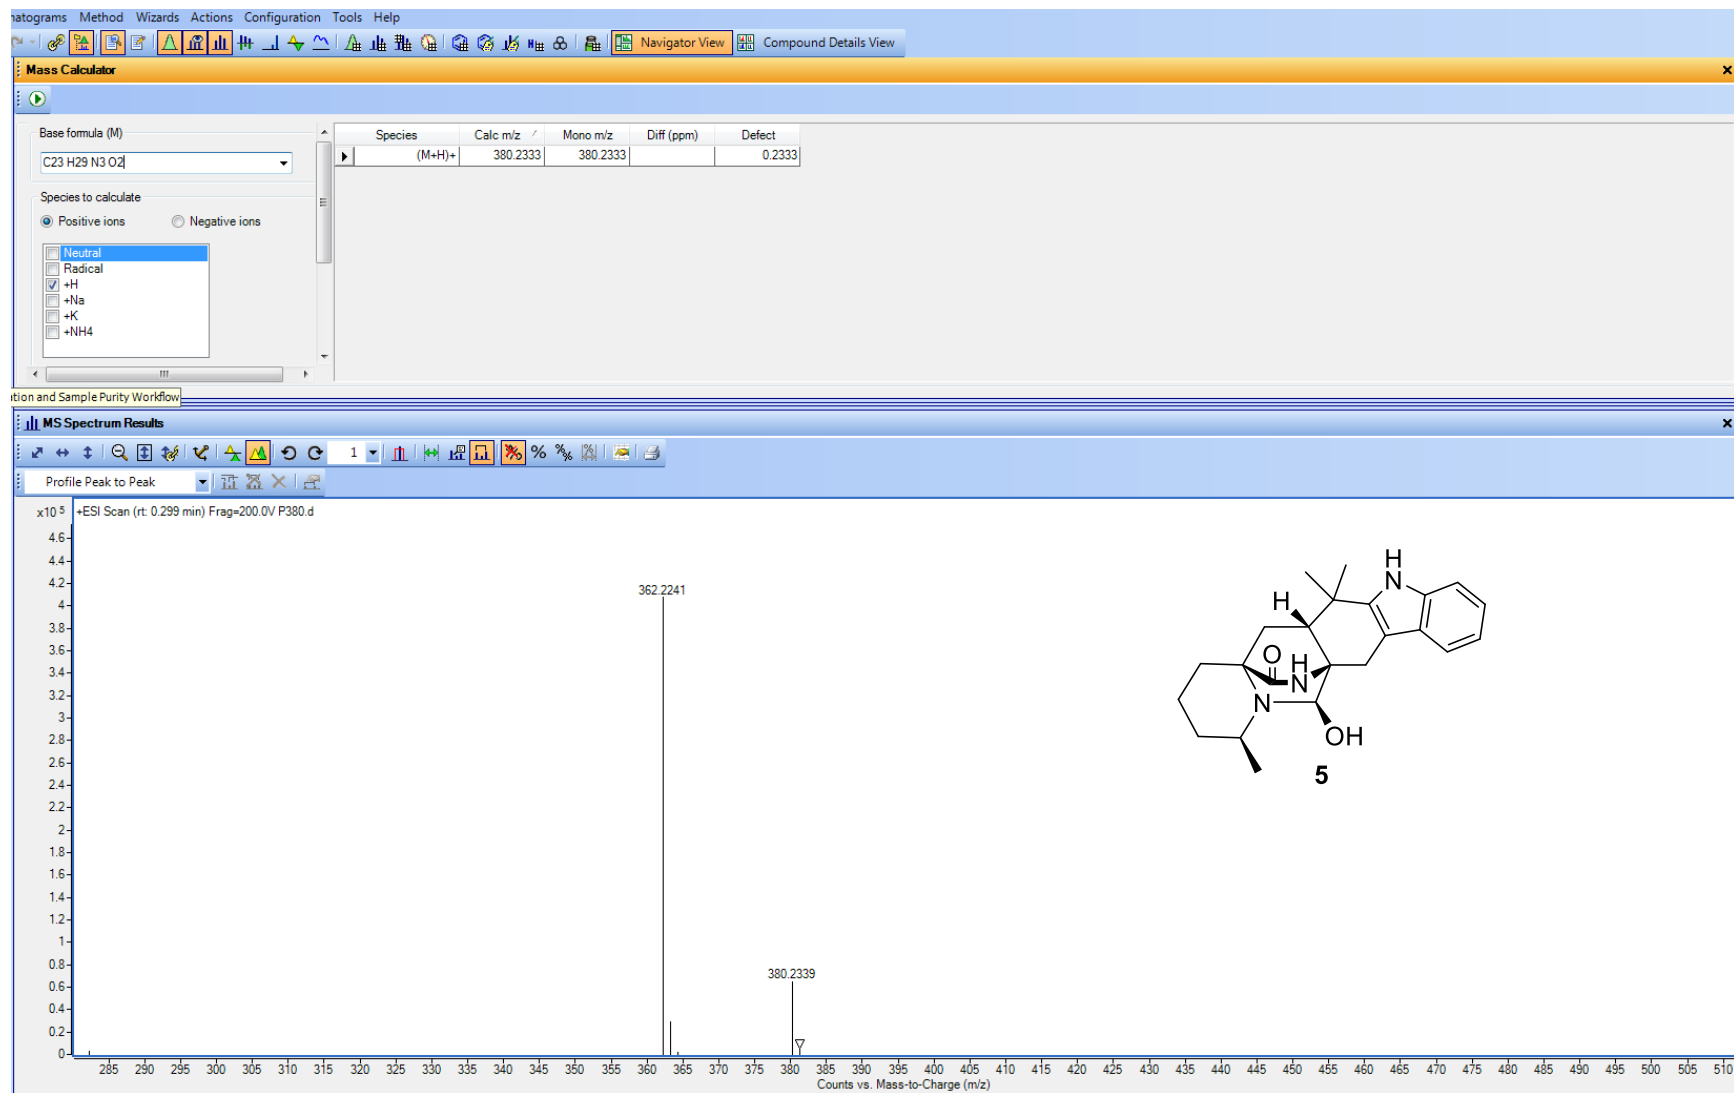

Supplementary Fig. 10-8 | HRMS spectrum of 5.



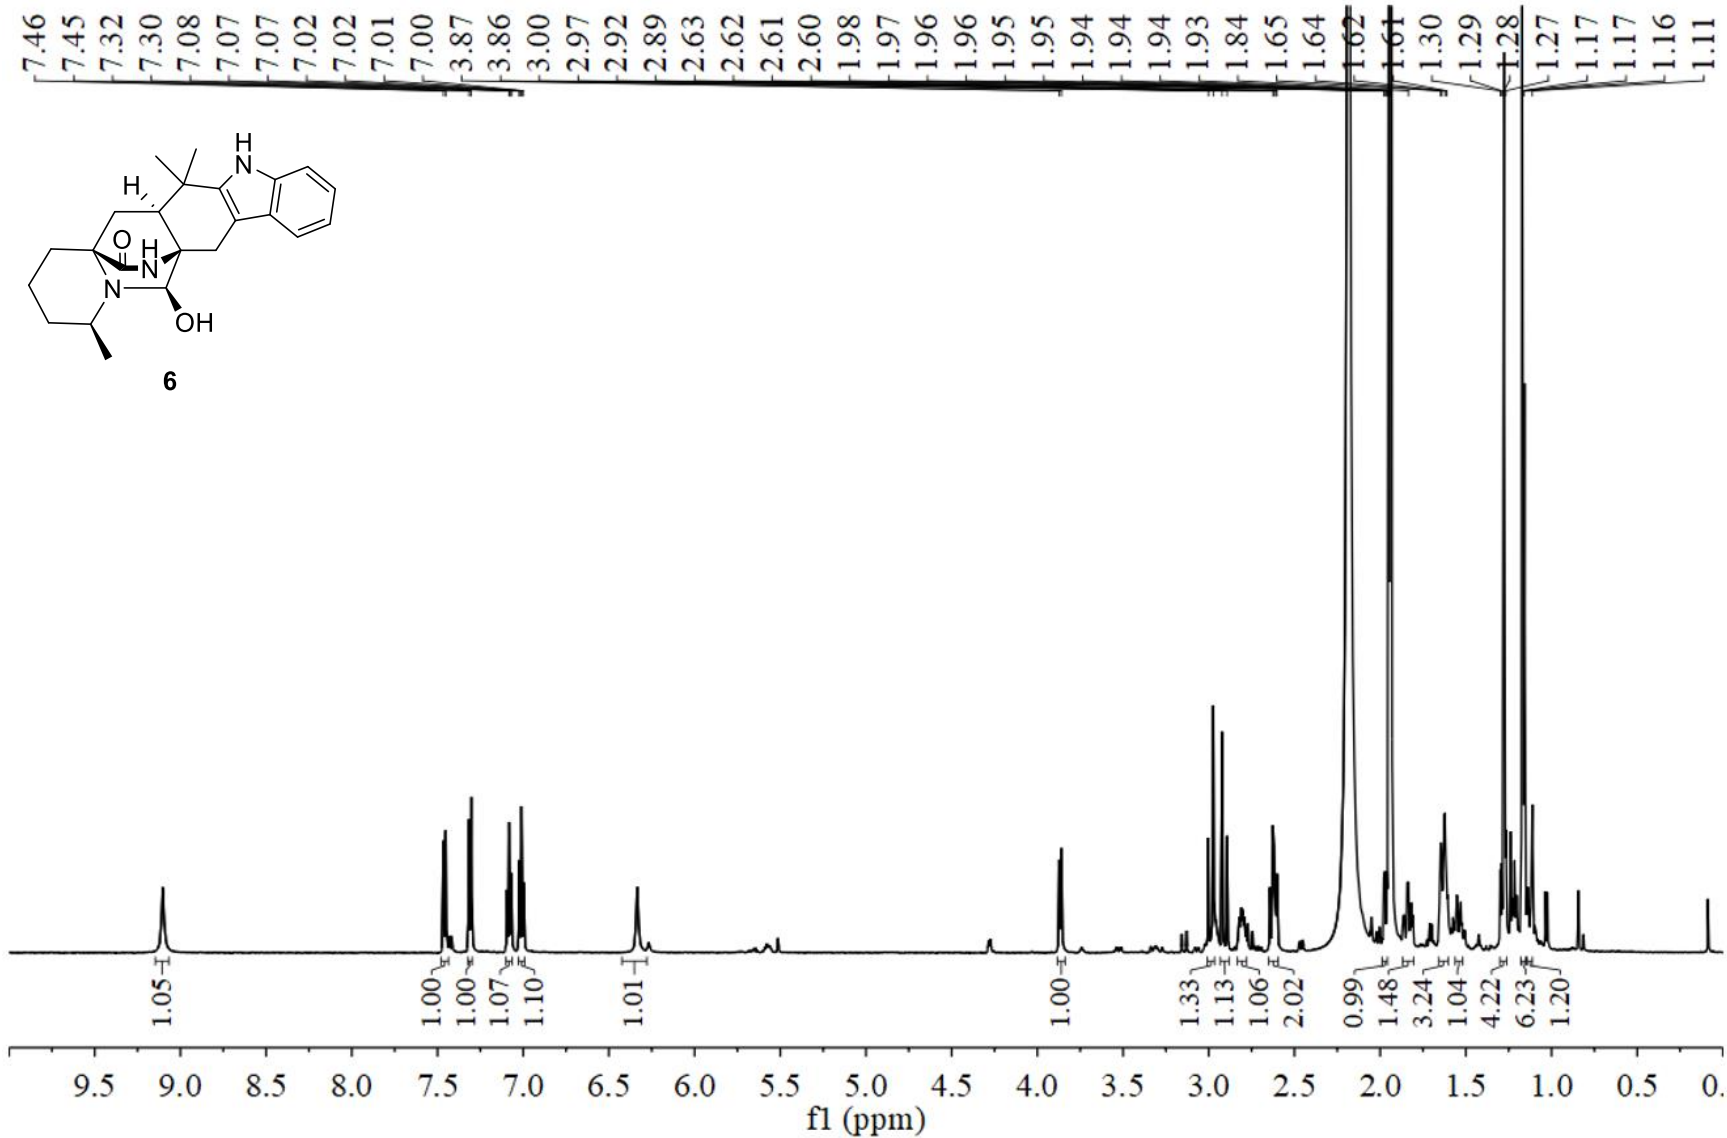

Supplementary Fig. 11-1 | <sup>1</sup>H NMR spectrum of 6 in CD<sub>3</sub>CN.

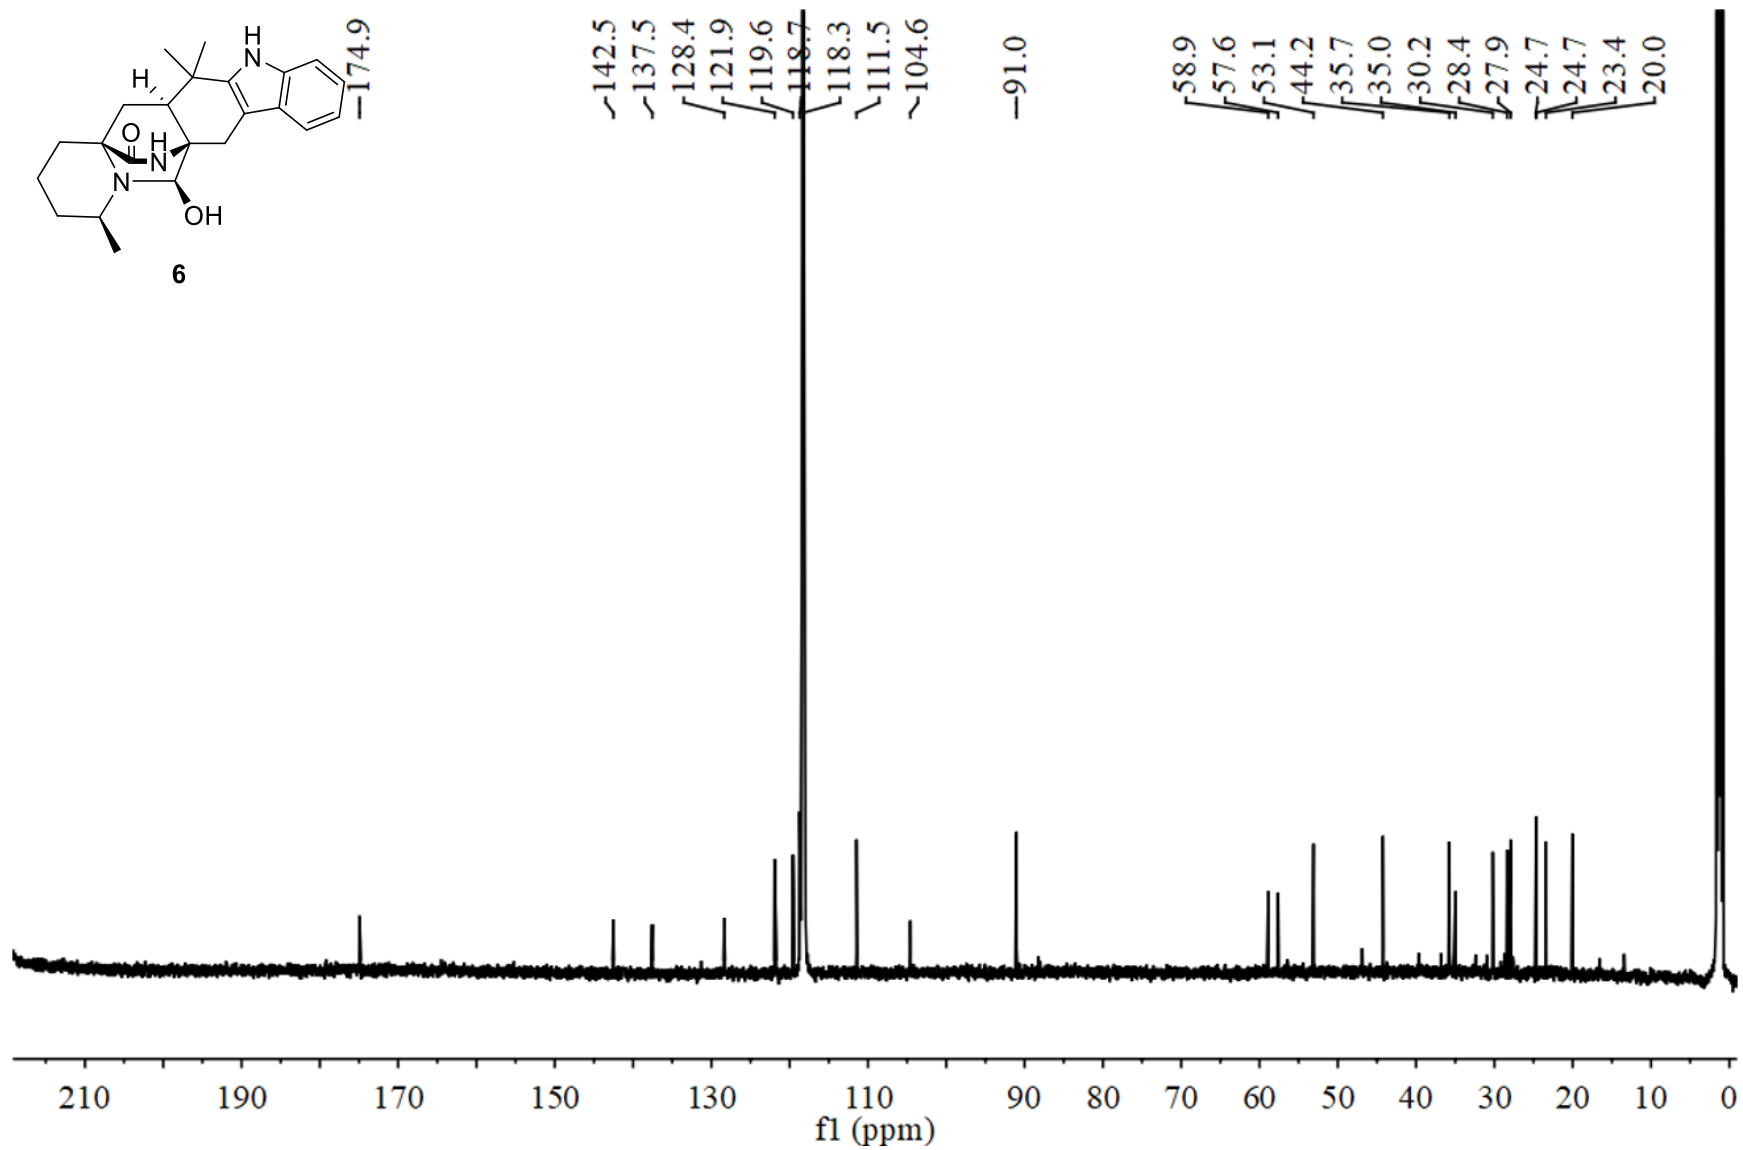

Supplementary Fig. 11-2 |  $^{13}\text{C}$  NMR spectrum of 6 in  $\text{CD}_3\text{CN}$ .

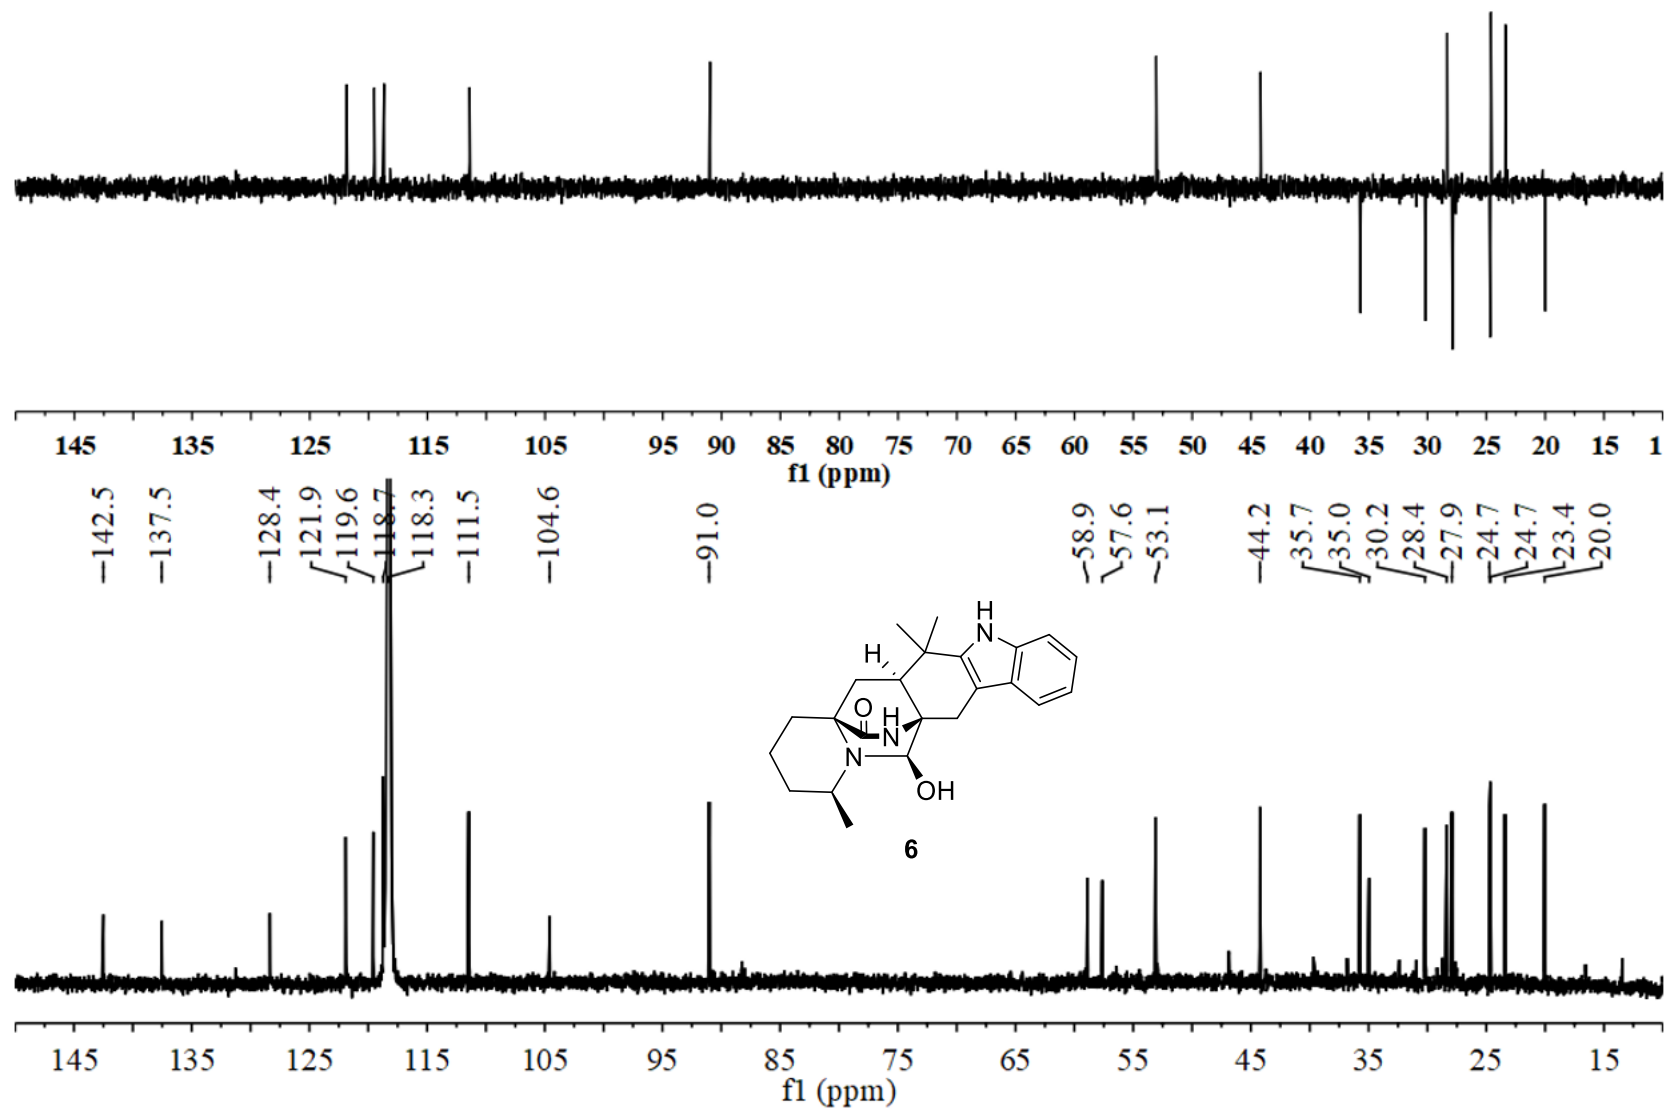

Supplementary Fig. 11-3 | DEPT135 and <sup>13</sup>C NMR spectra of 6 in CD<sub>3</sub>CN.

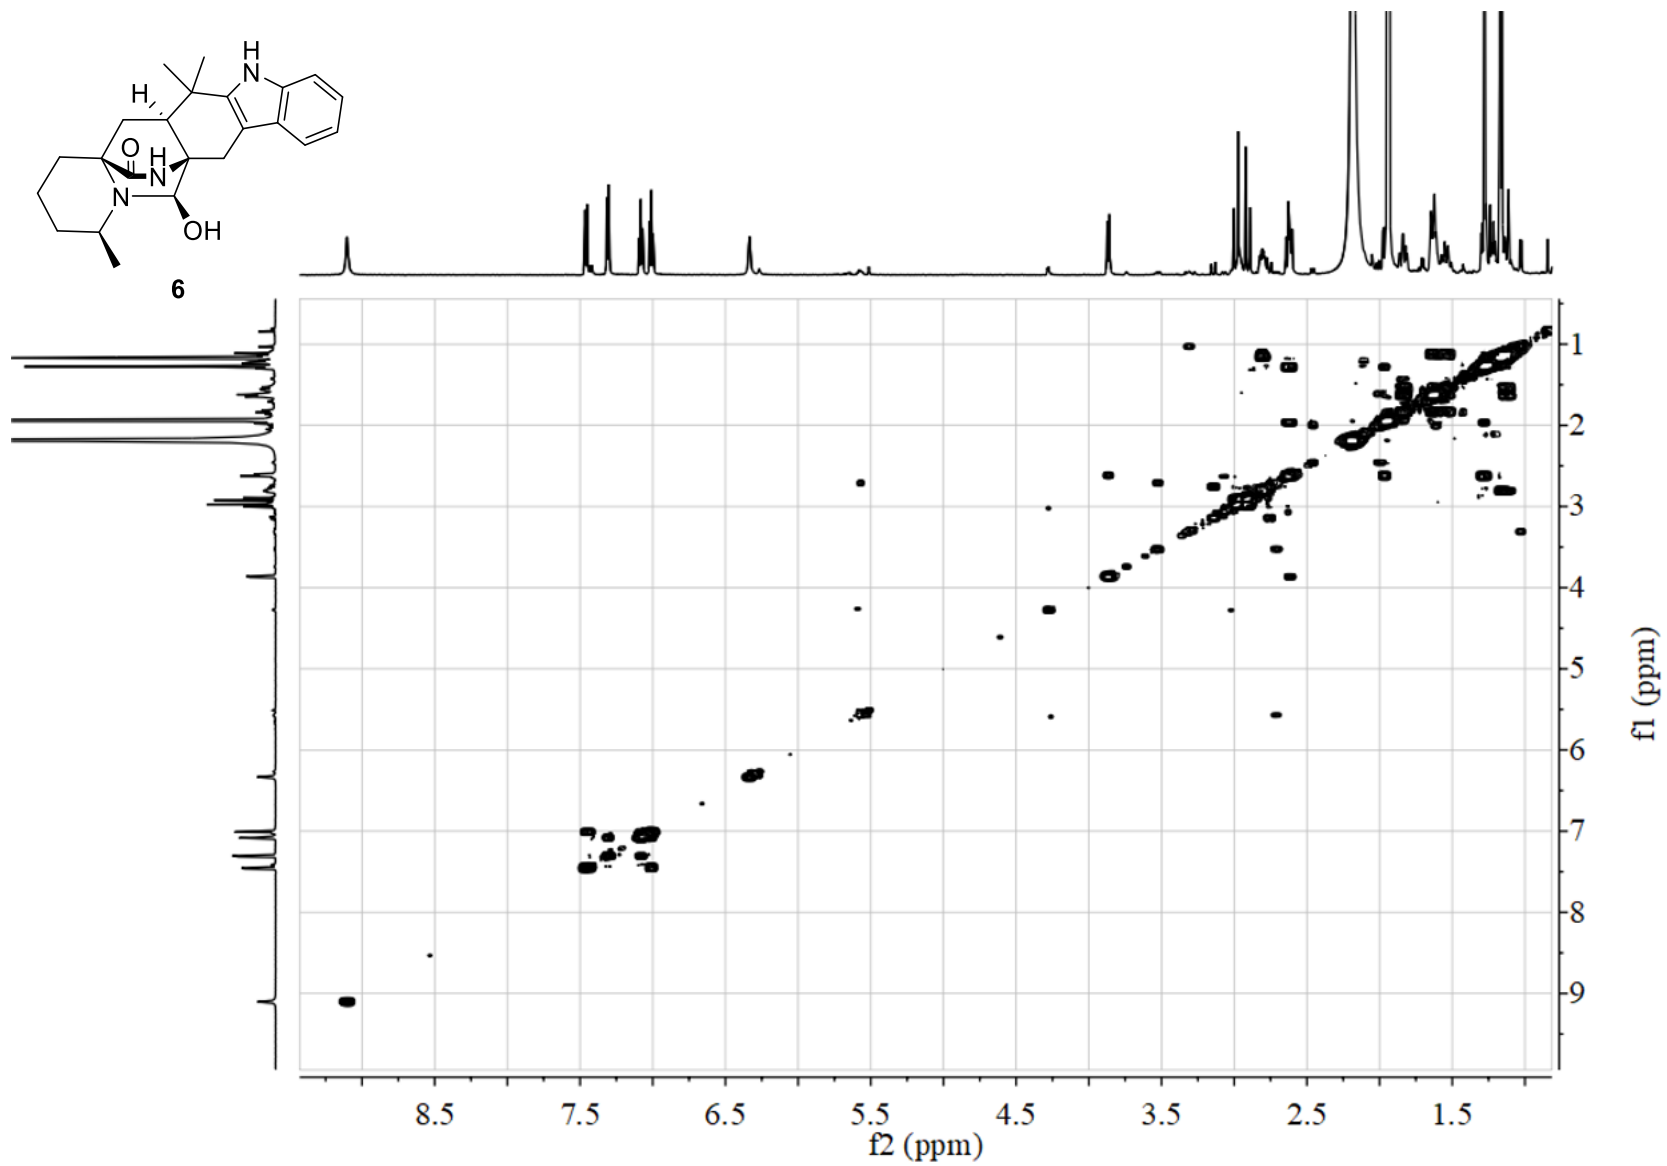

Supplementary Fig. 11-4 |  $^1\text{H}$ - $^1\text{H}$  COSY NMR spectrum of 6 in  $\text{CD}_3\text{CN}$ .

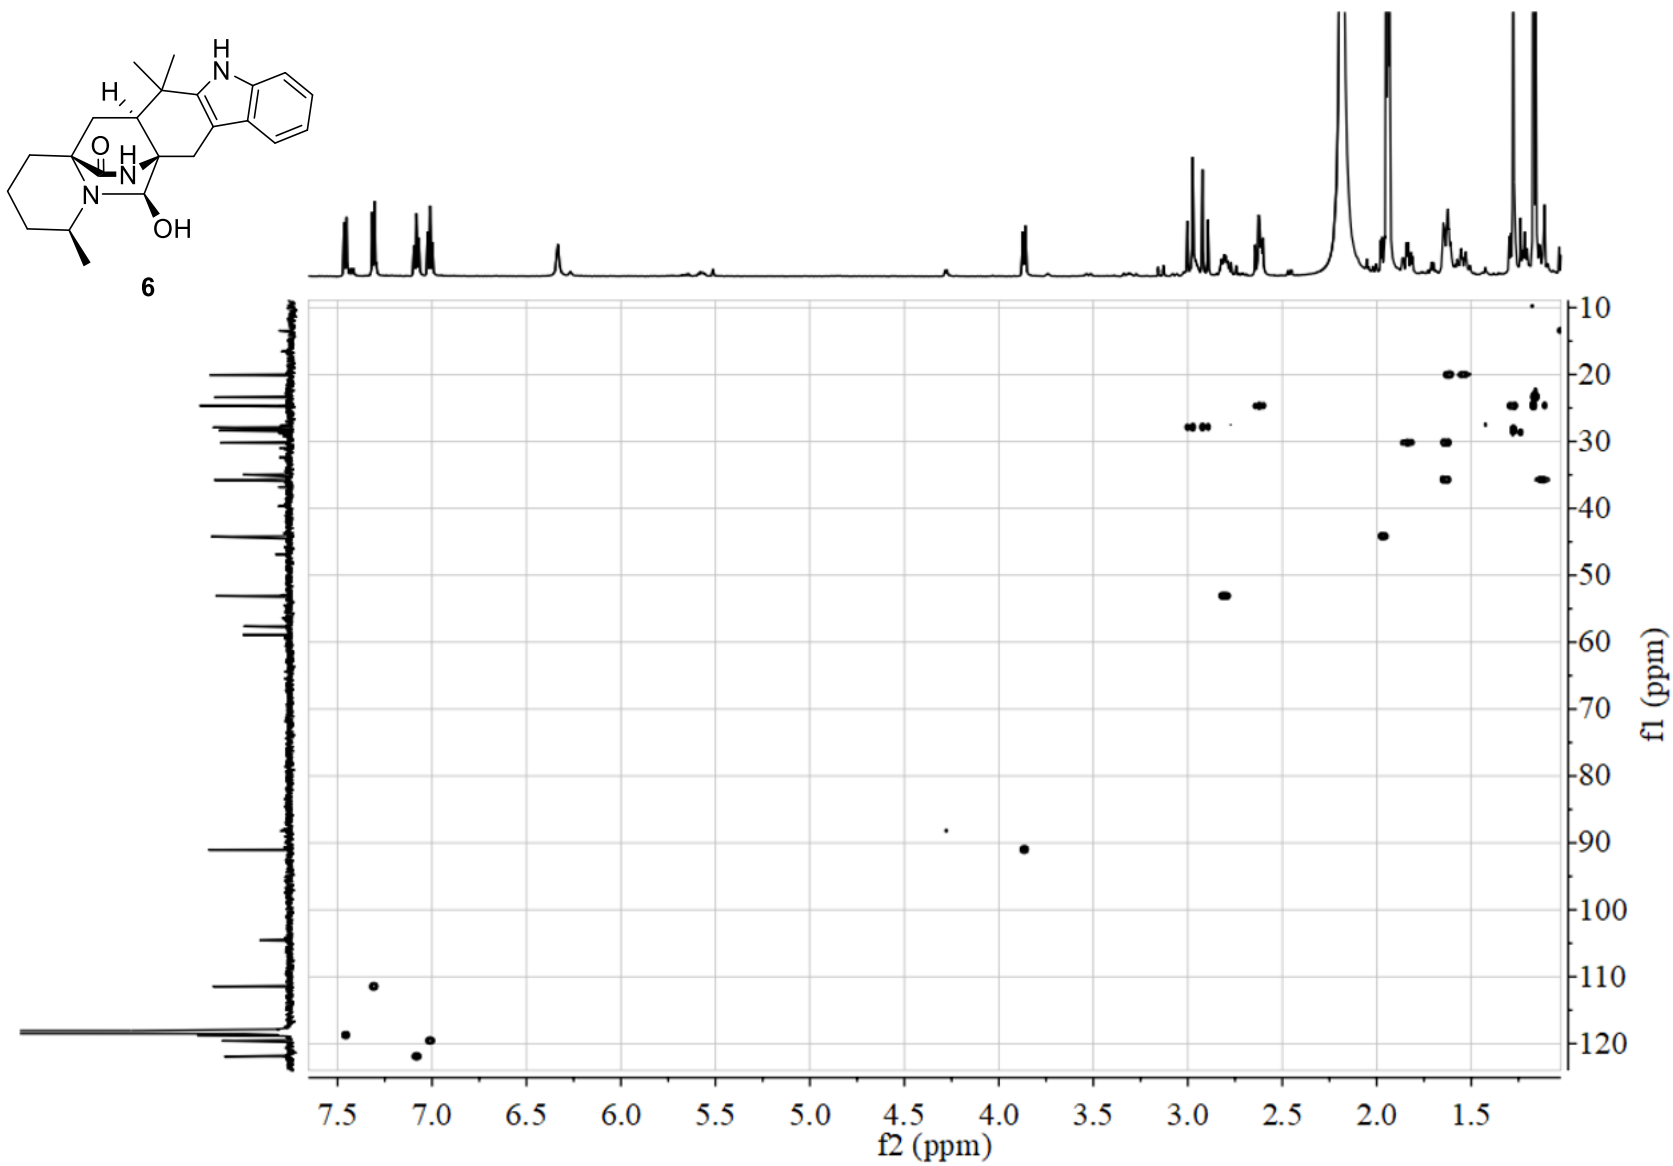

Supplementary Fig. 11-5 | HSQC NMR spectrum of 6 in CD<sub>3</sub>CN.

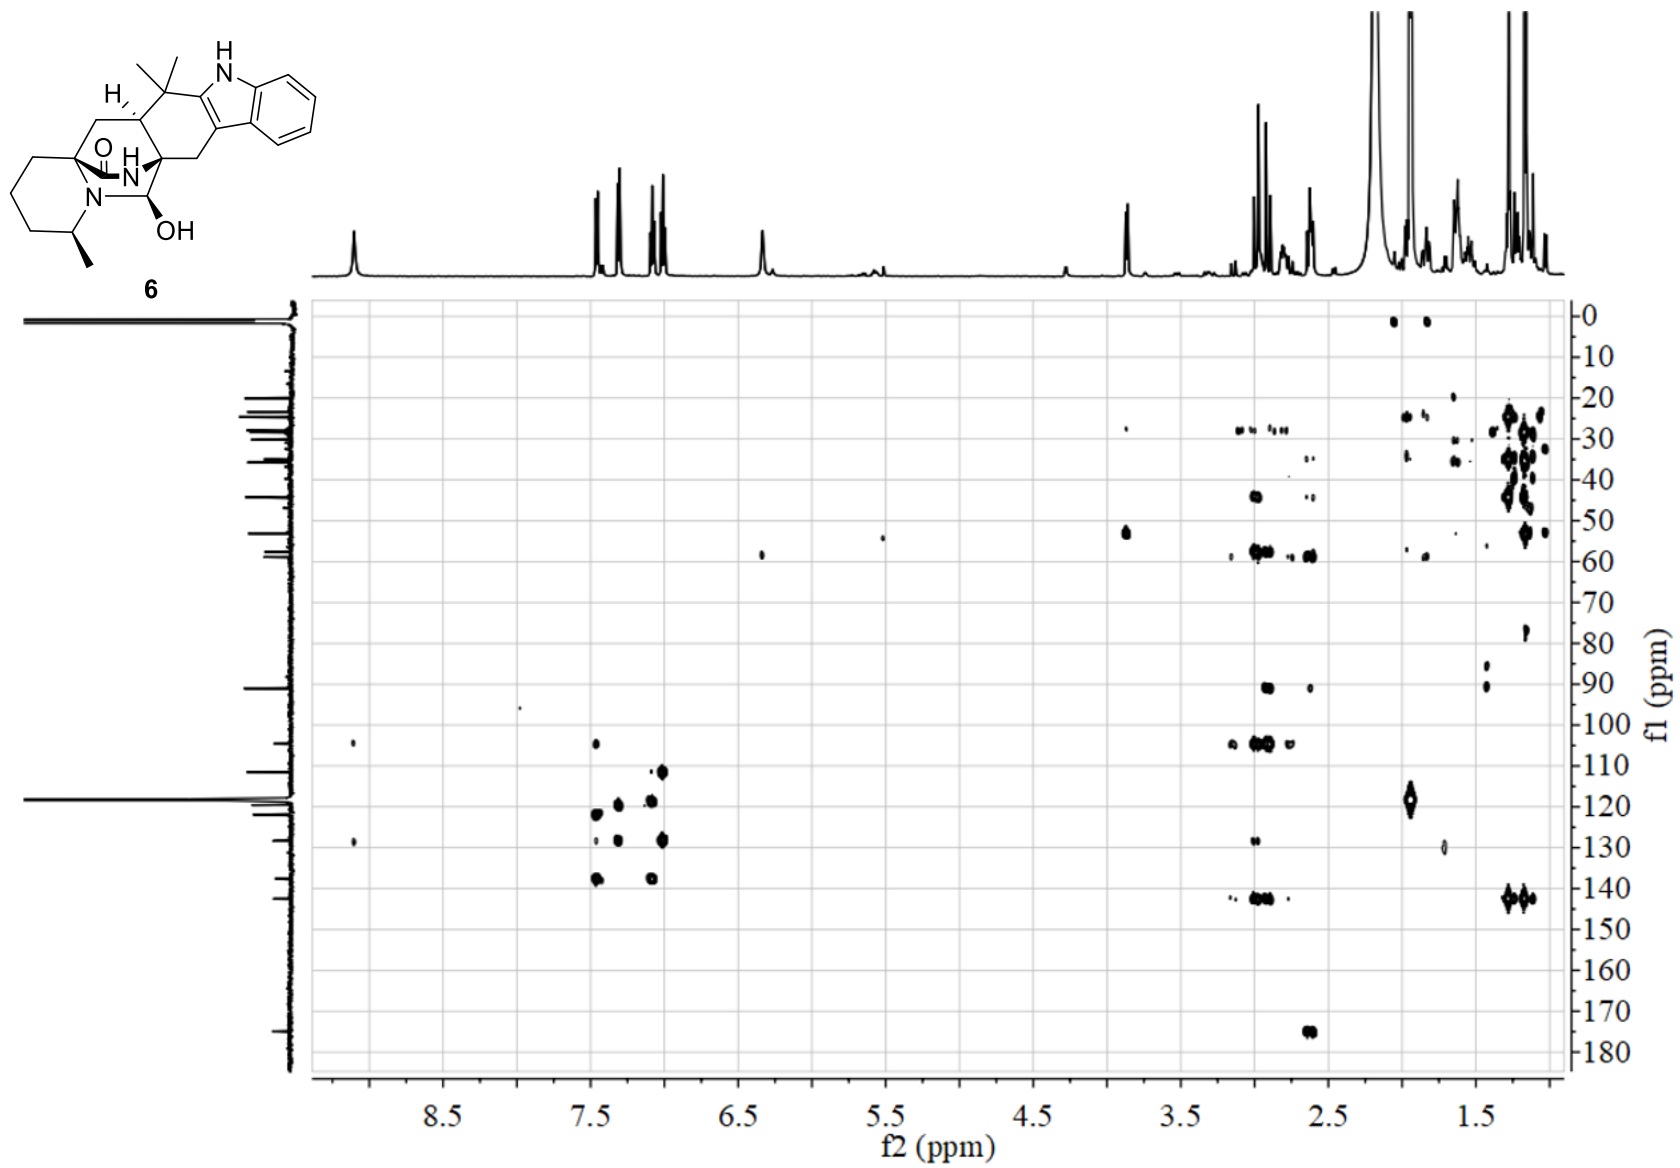

Supplementary Fig. 11-6 | HMBC NMR spectrum of **6** in CD<sub>3</sub>CN.

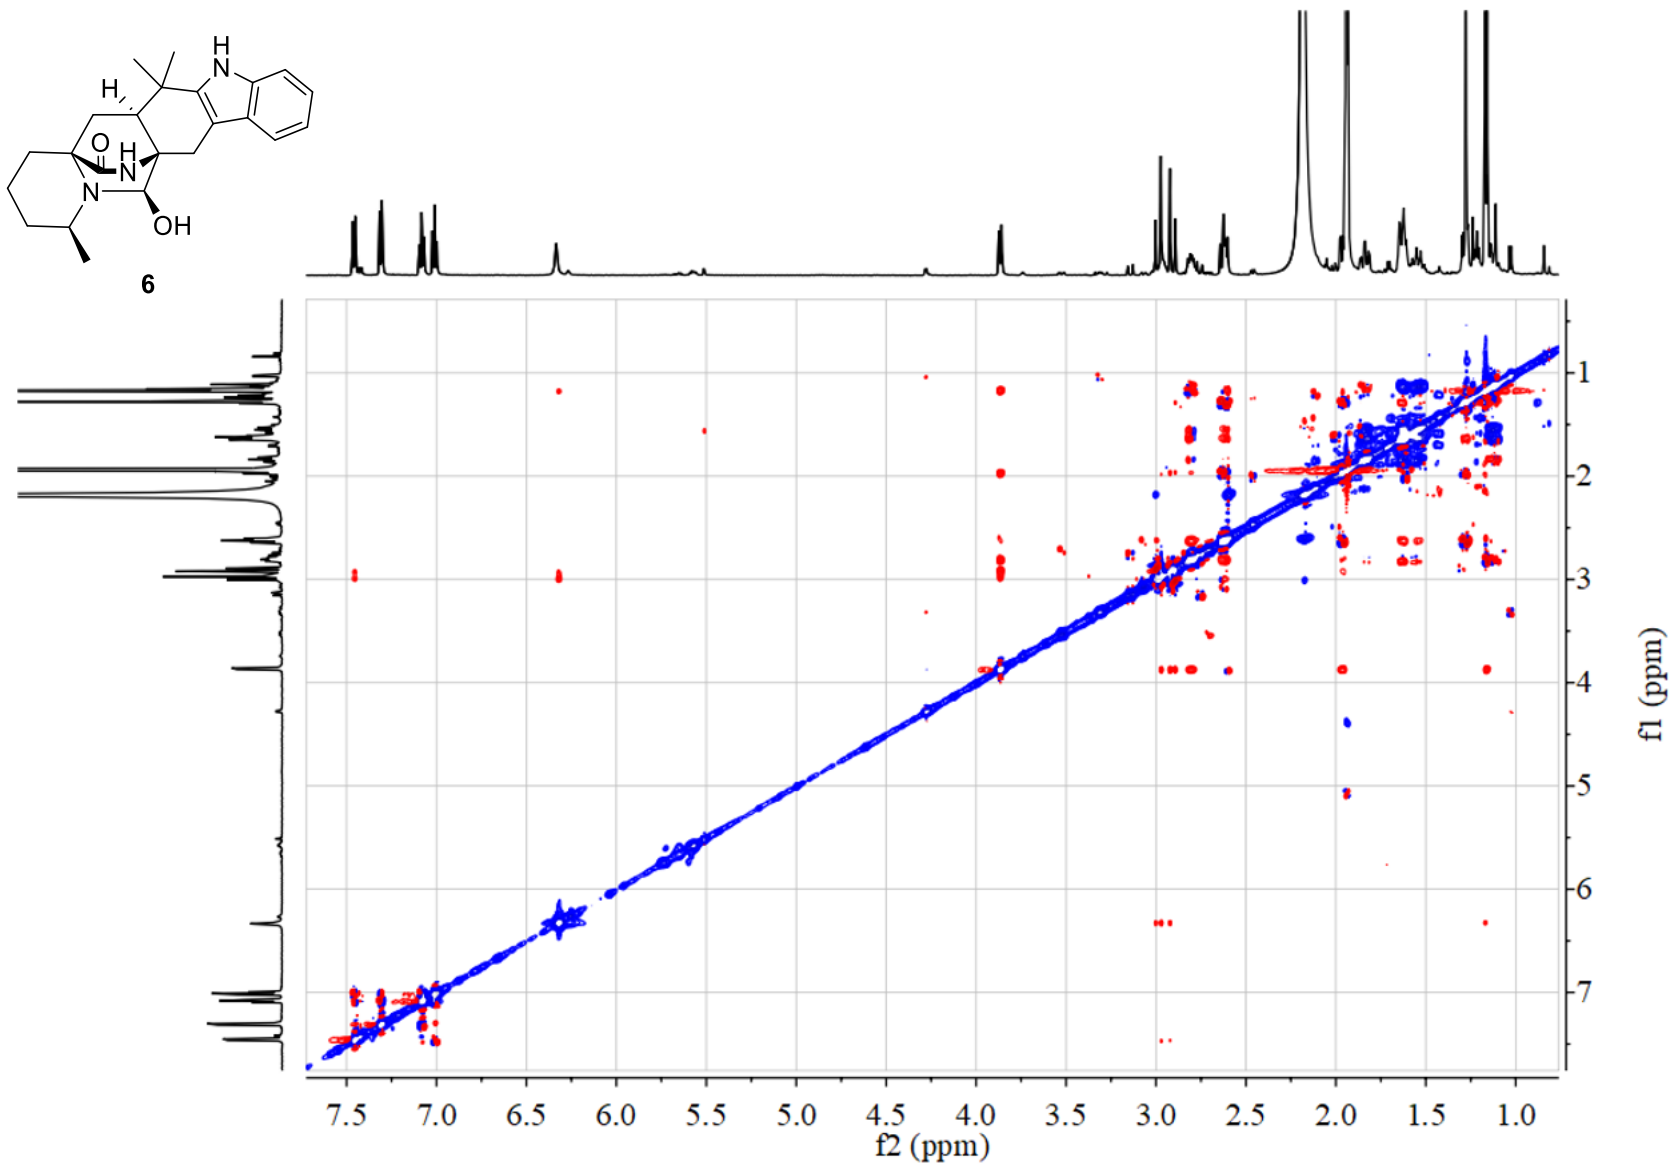

Supplementary Fig. 11-7 | NOESY NMR spectrum of 6 in CD<sub>3</sub>CN.

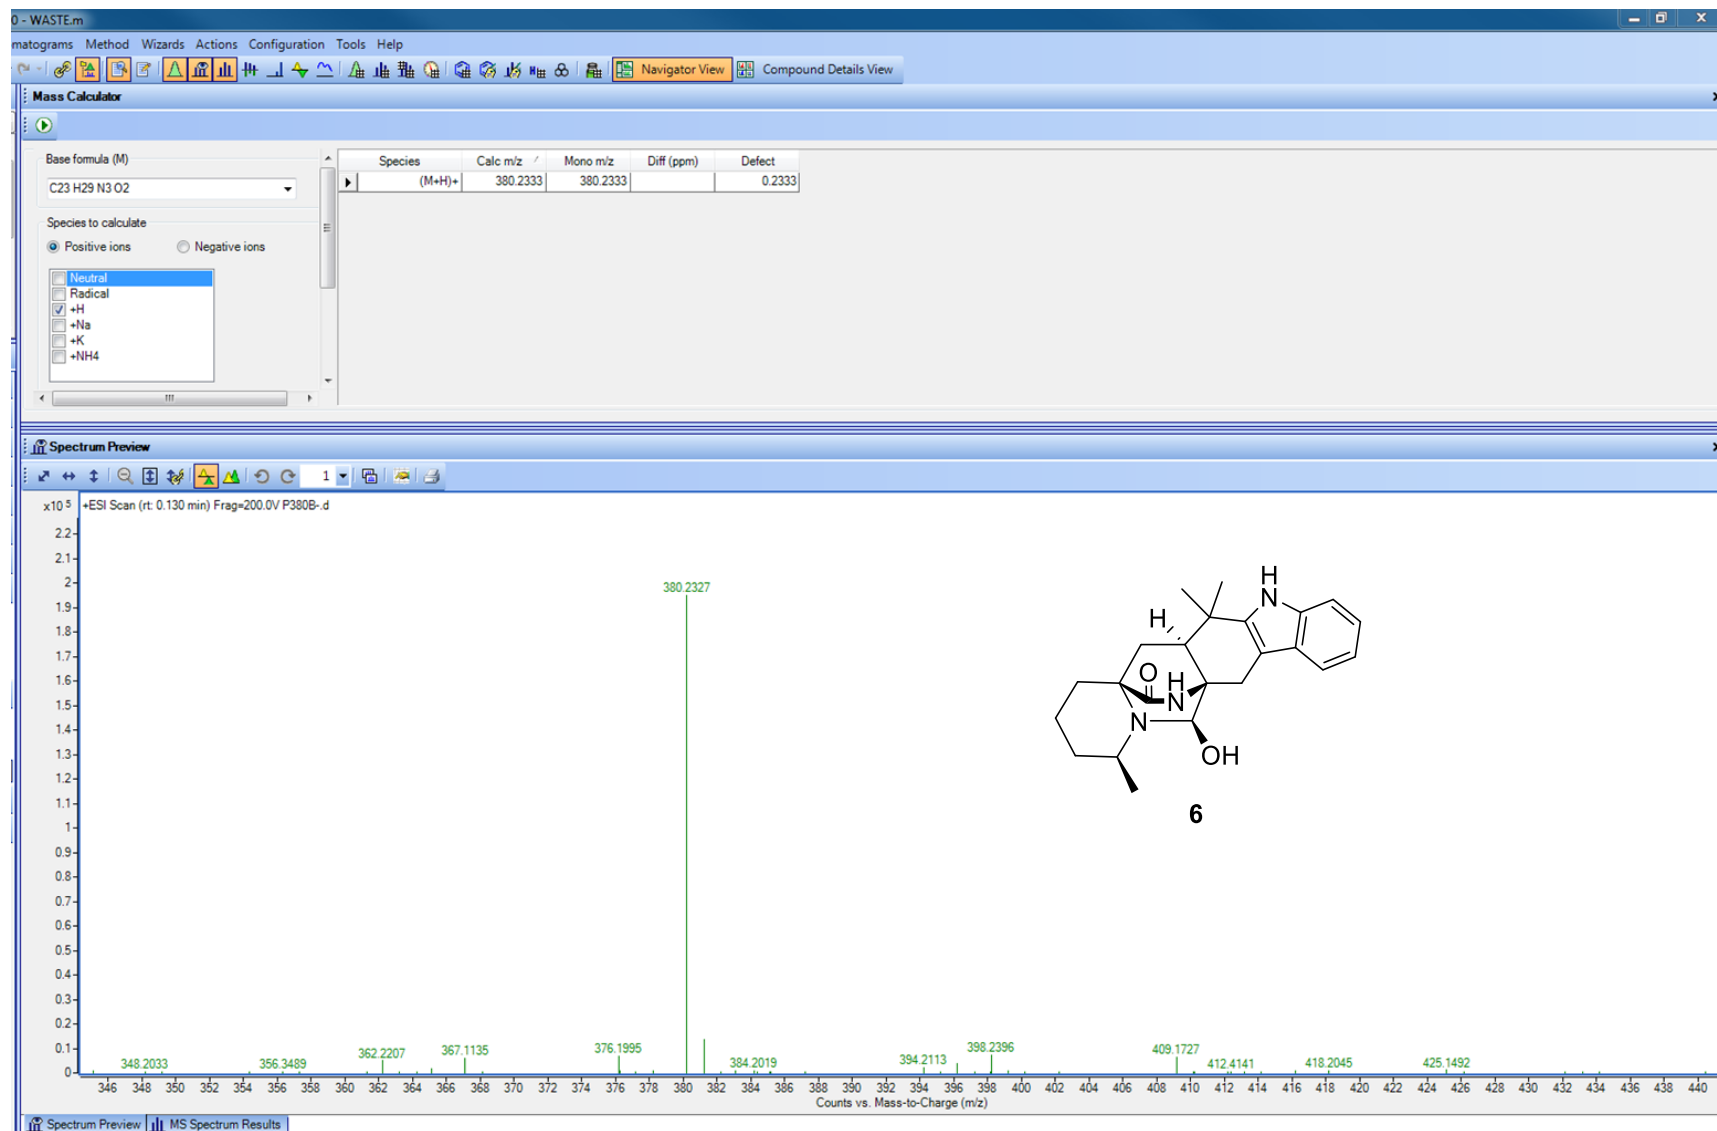

Supplementary Fig. 11-8 | HRMS spectrum of 6.



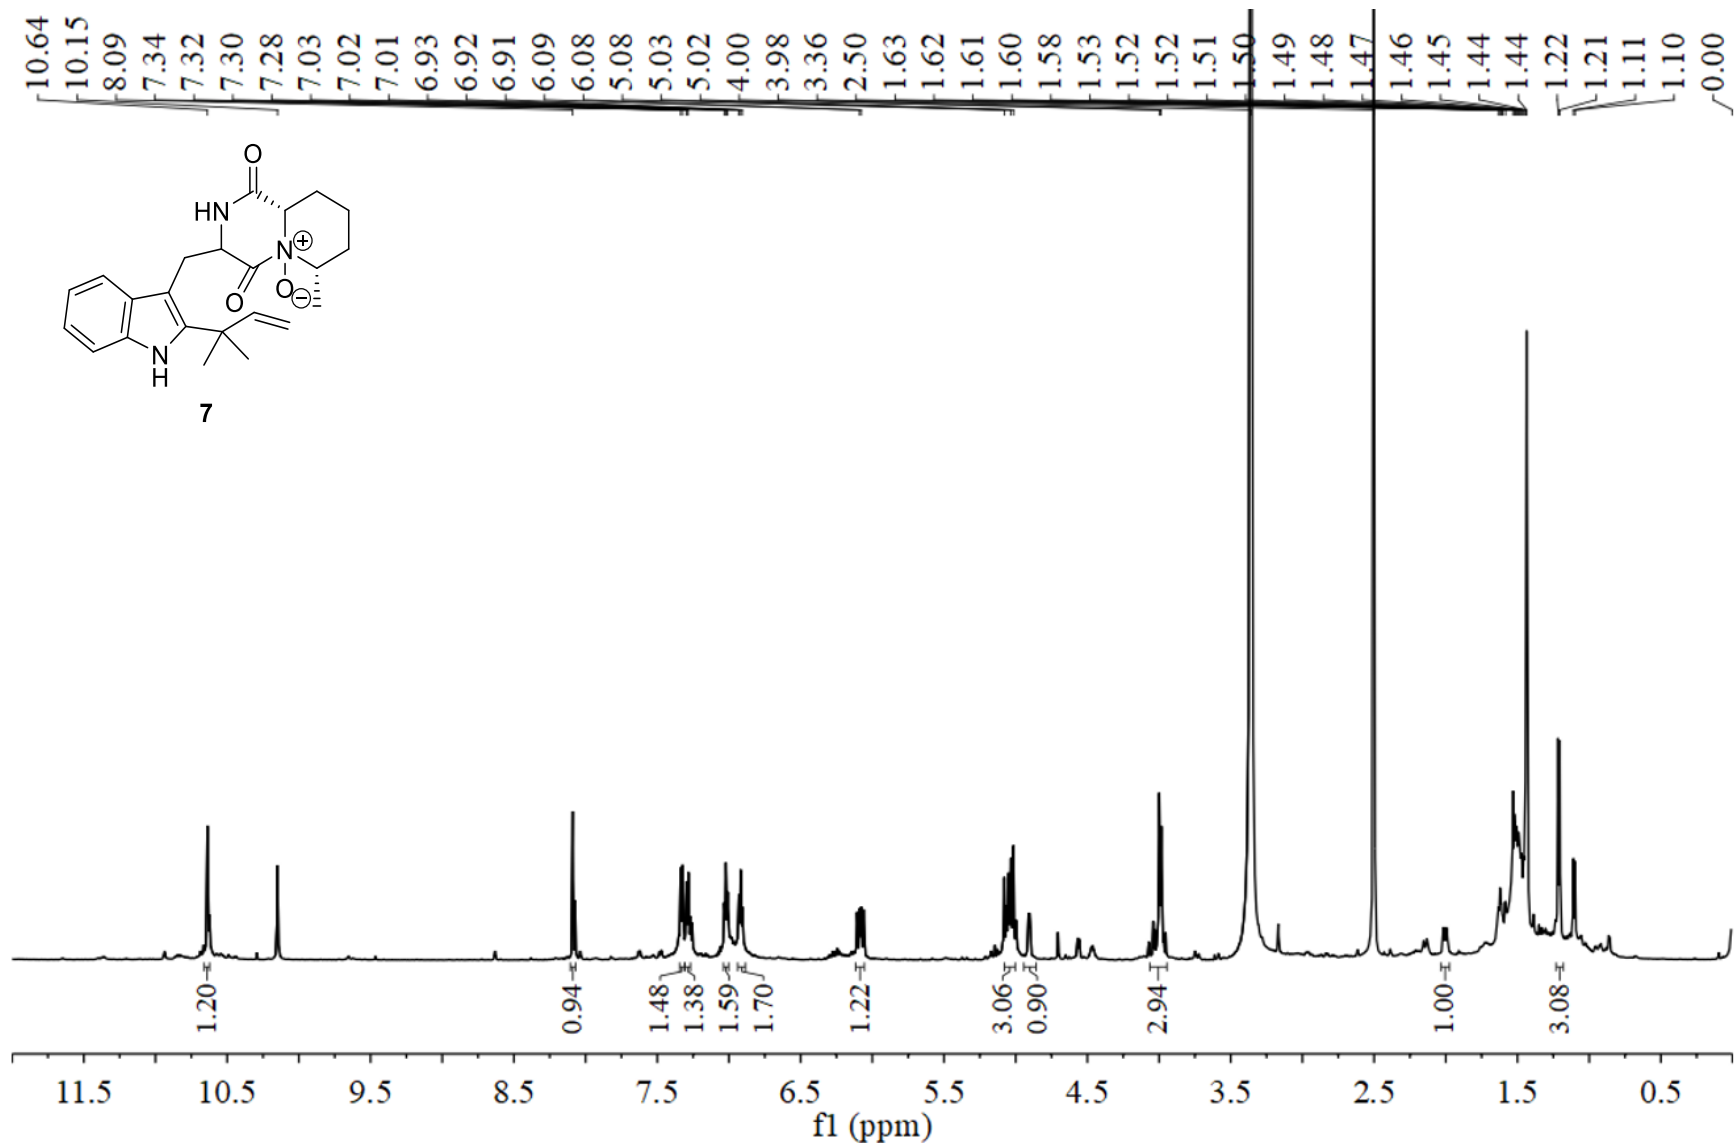

Supplementary Fig. 12-1 | <sup>1</sup>H NMR spectrum of 7 in DMSO-*d*<sub>6</sub>.

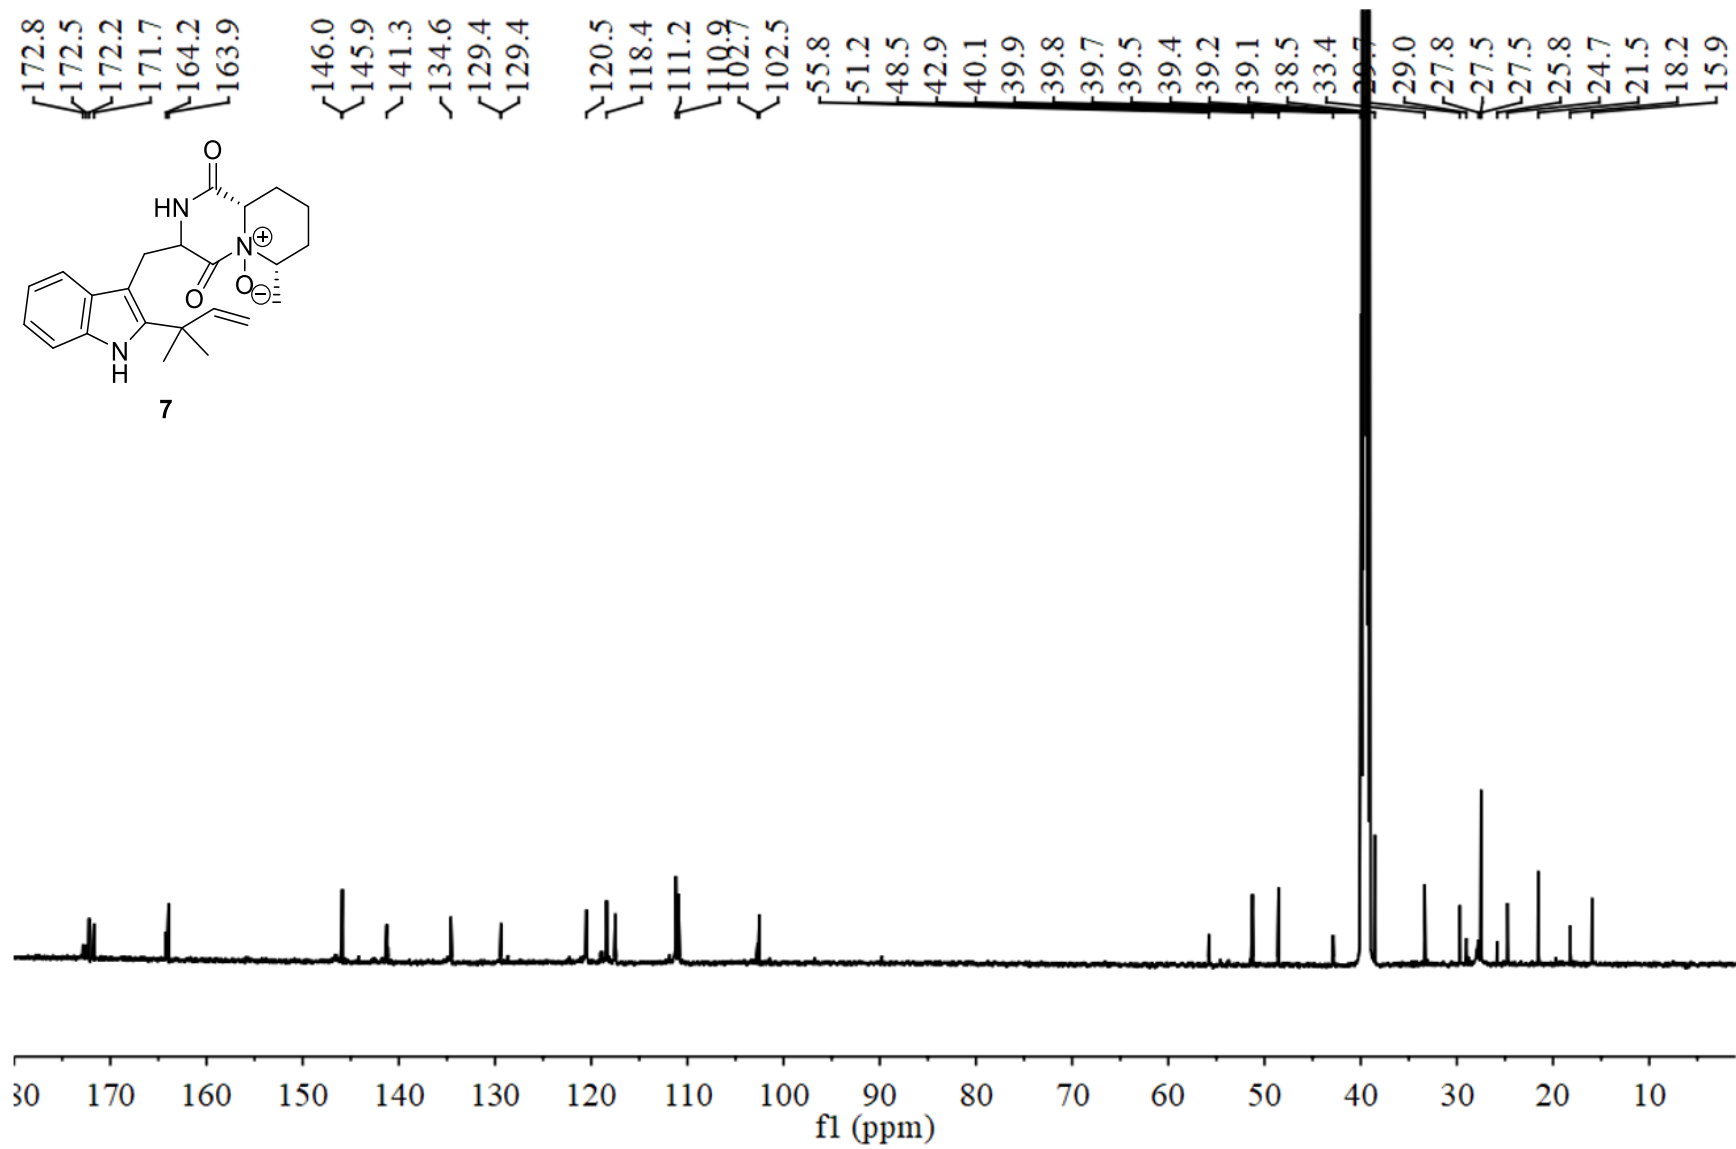

Supplementary Fig. 12-2 |  $^{13}\text{C}$  NMR spectrum of 7 in  $\text{DMSO-}d_6$ .

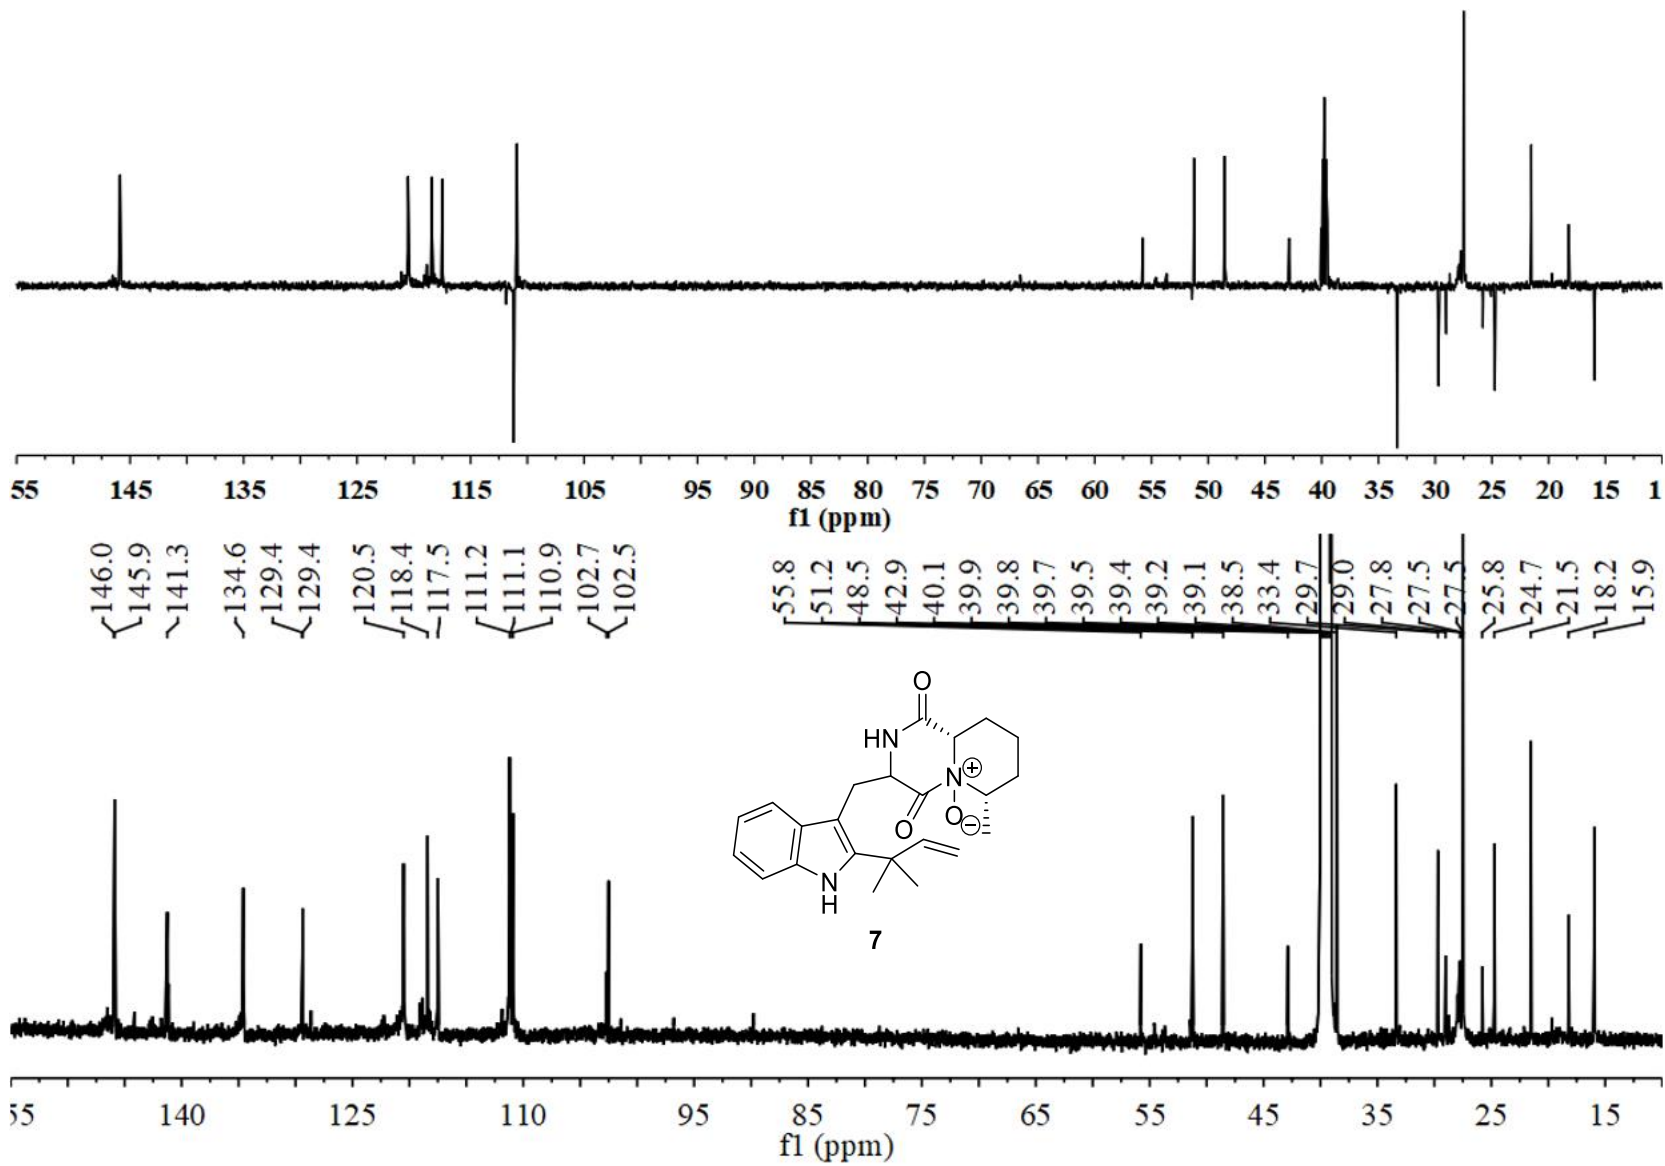

Supplementary Fig. 12-3 | DEPT135 and <sup>13</sup>C NMR spectra of 7 in DMSO-*d*<sub>6</sub>.

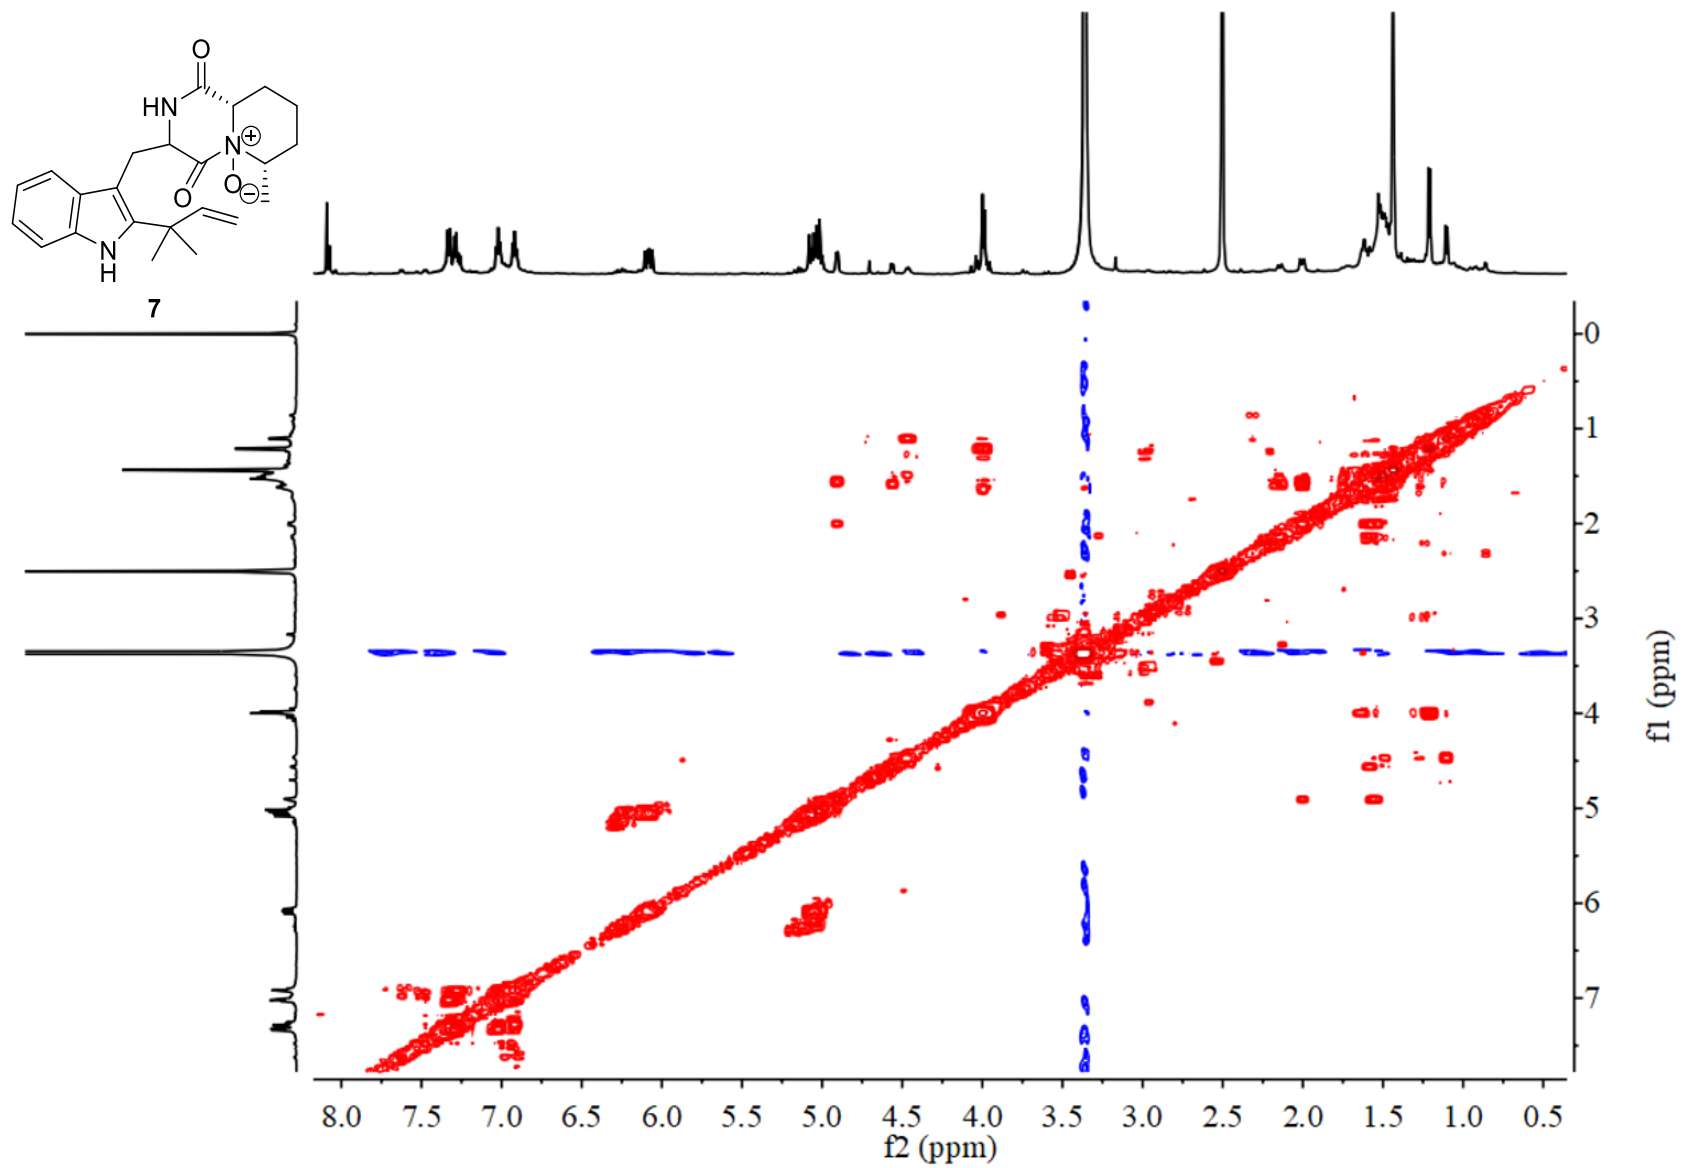

Supplementary Fig. 12-4 |  $^1\text{H}$ - $^1\text{H}$  COSY NMR spectrum of **7** in  $\text{DMSO-}d_6$ .

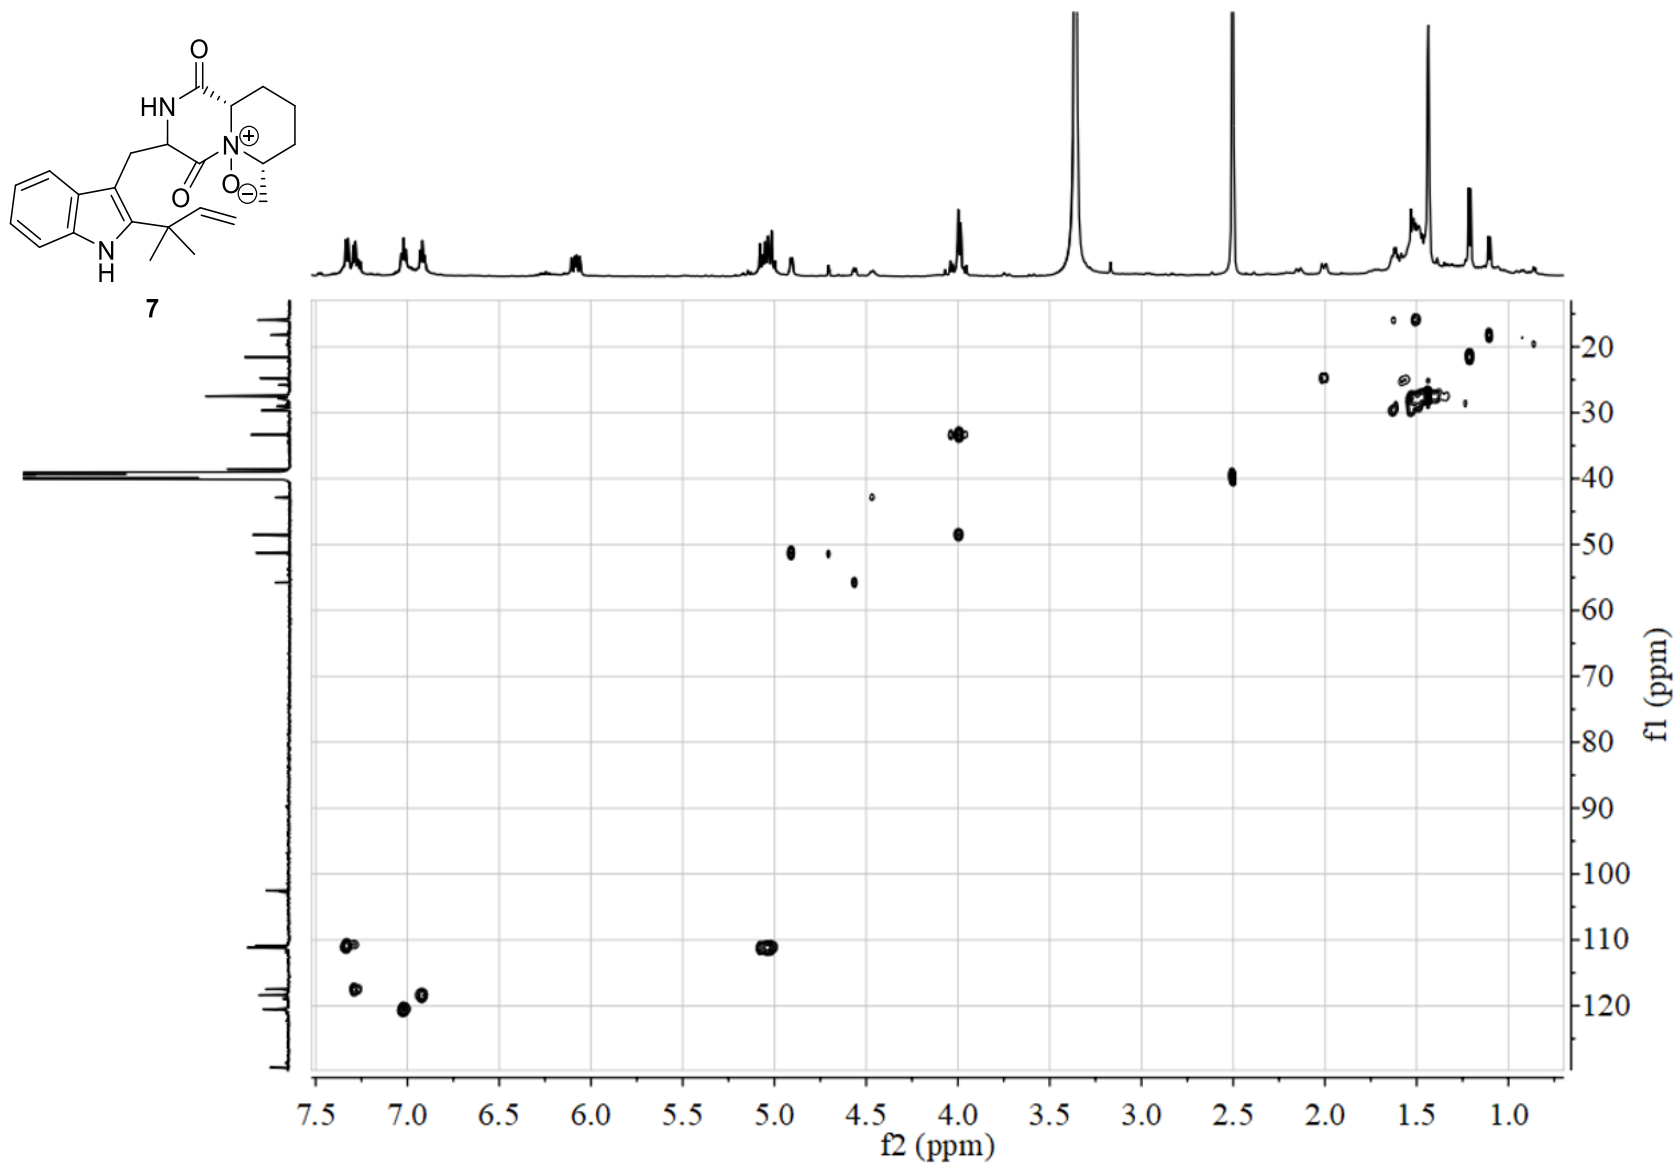

Supplementary Fig. 12-5 | HSQC NMR spectrum of 7 in DMSO-*d*<sub>6</sub>.

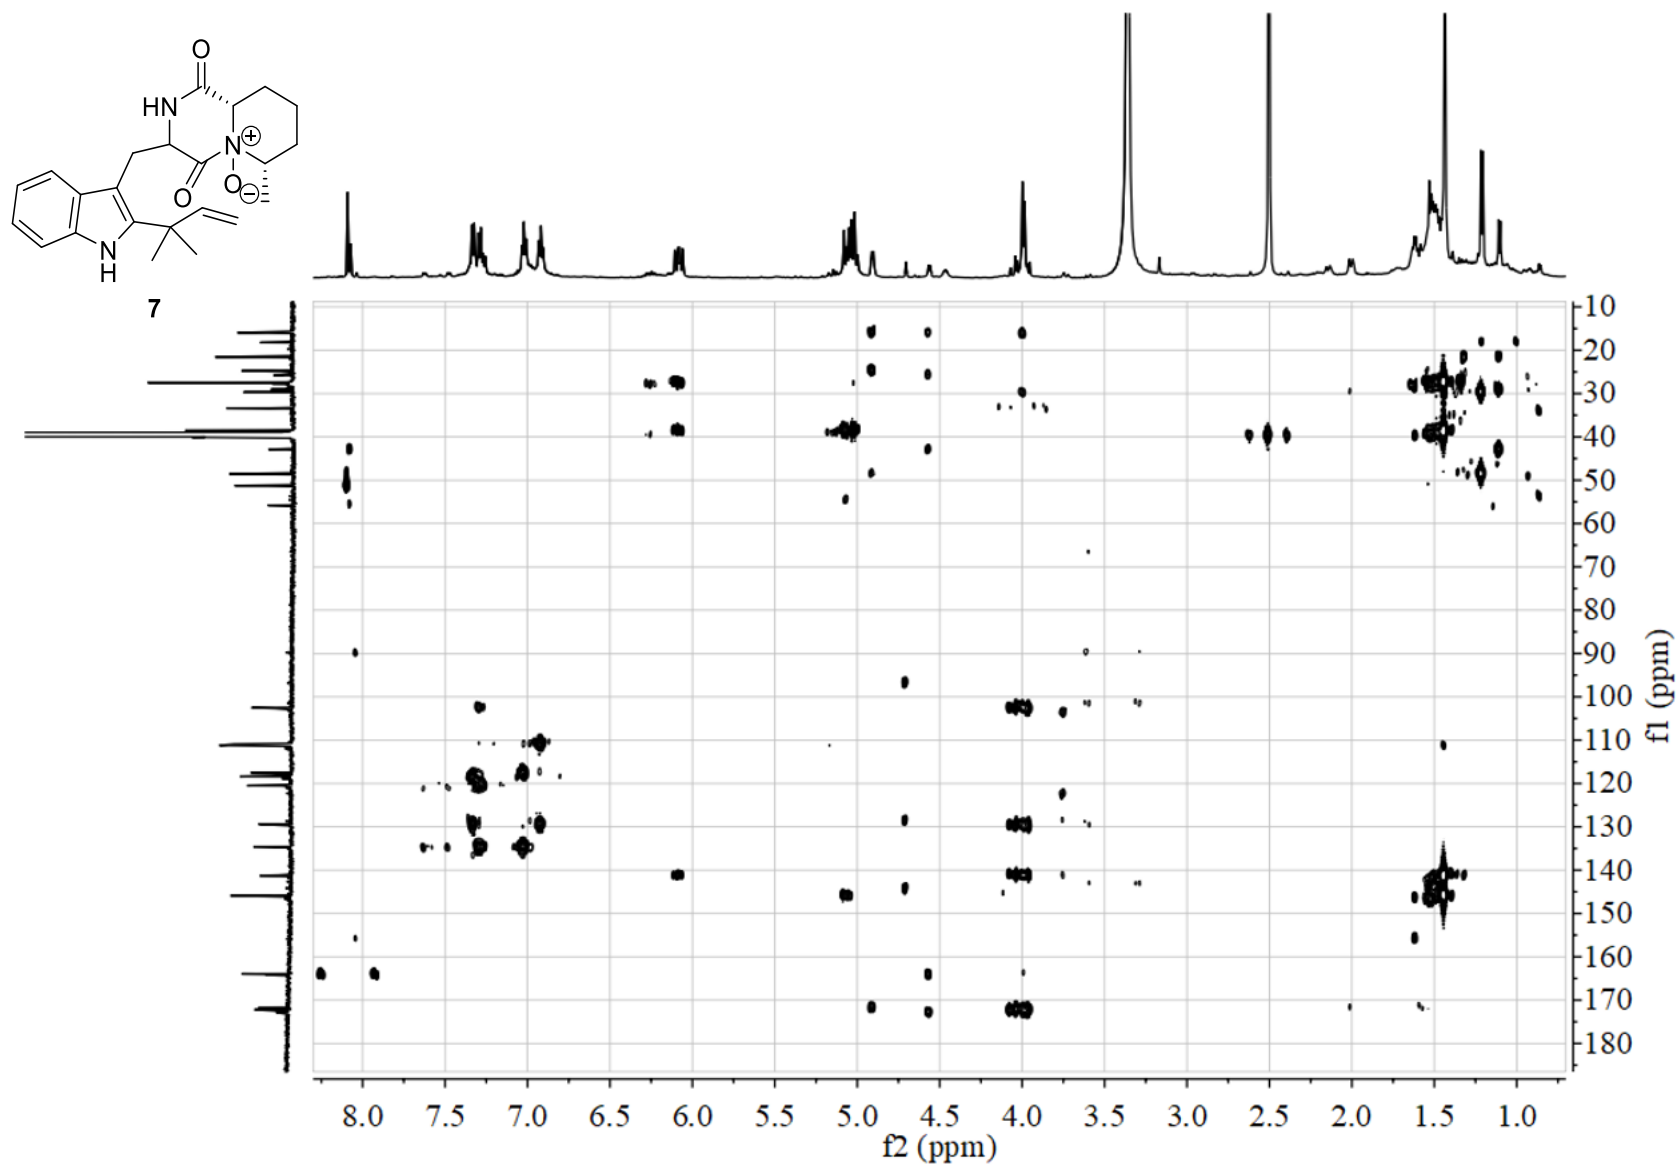

Supplementary Fig. 12-6 | HMBC NMR spectrum of 7 in DMSO-*d*<sub>6</sub>.

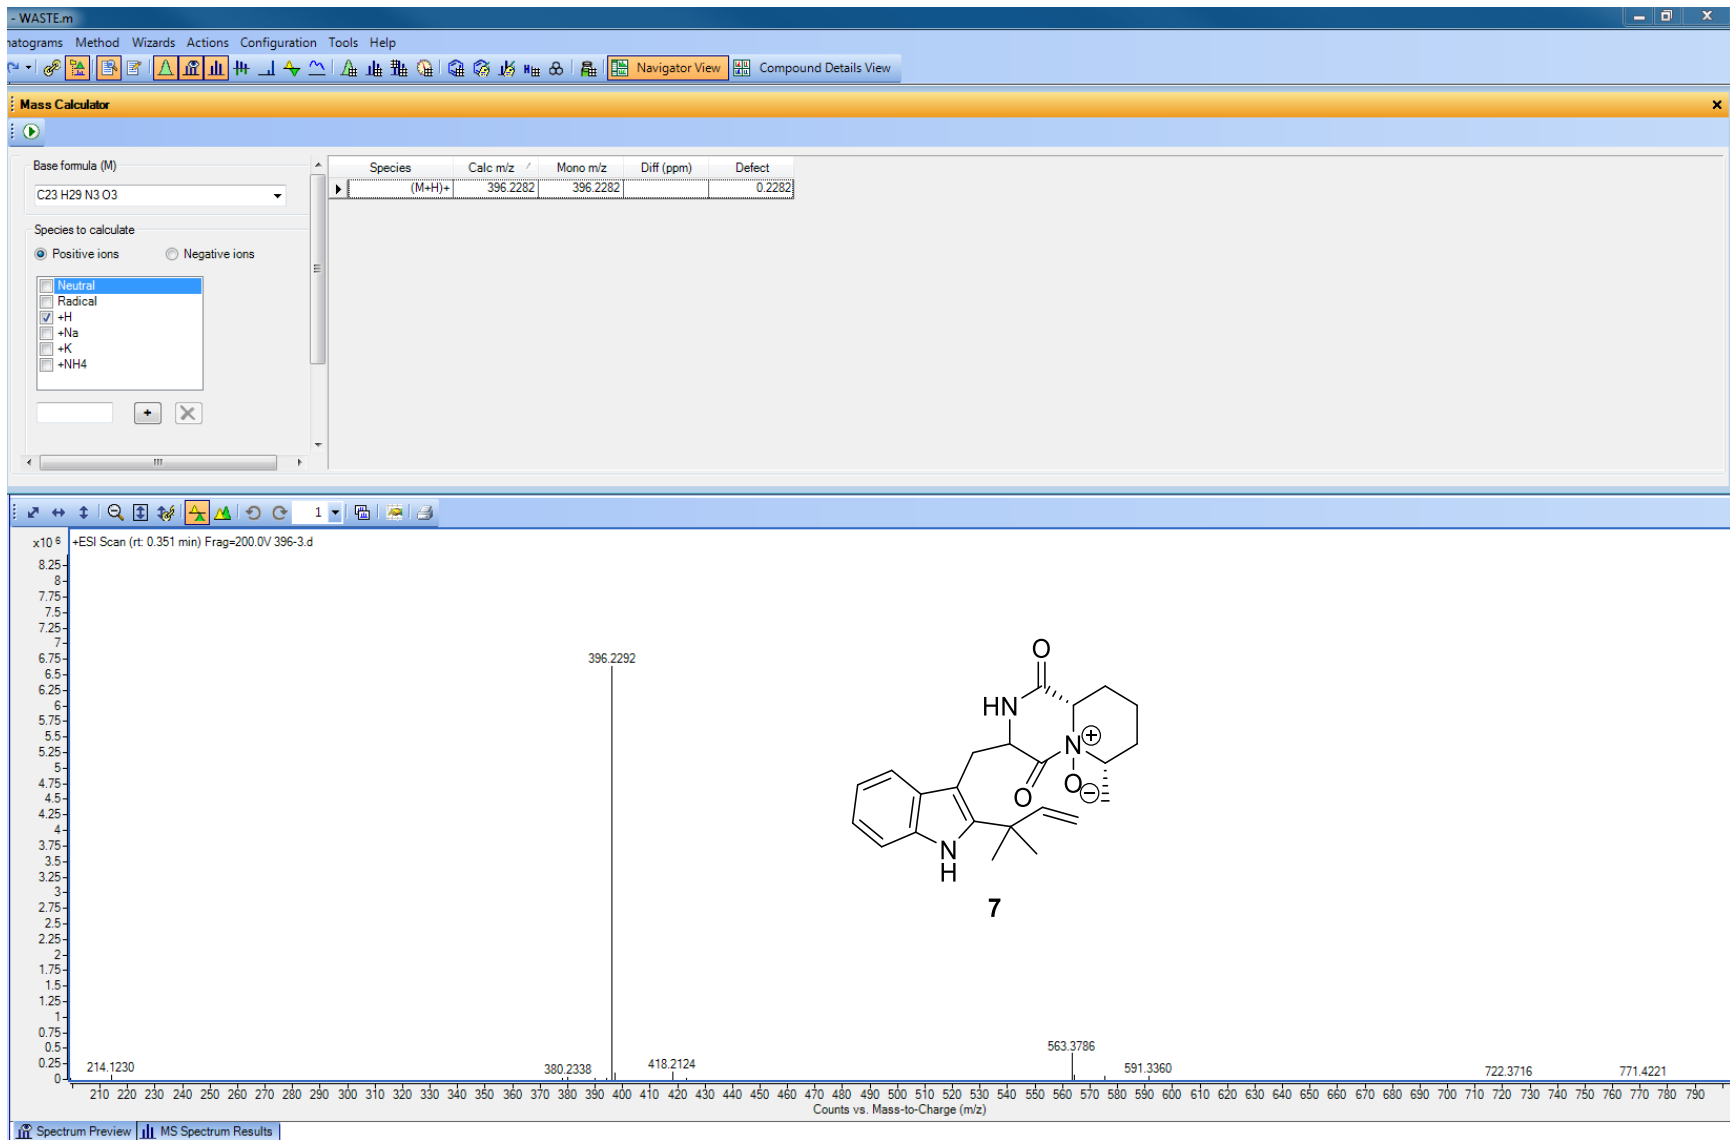

Supplementary Fig. 12-7 | HRMS spectrum of 7.

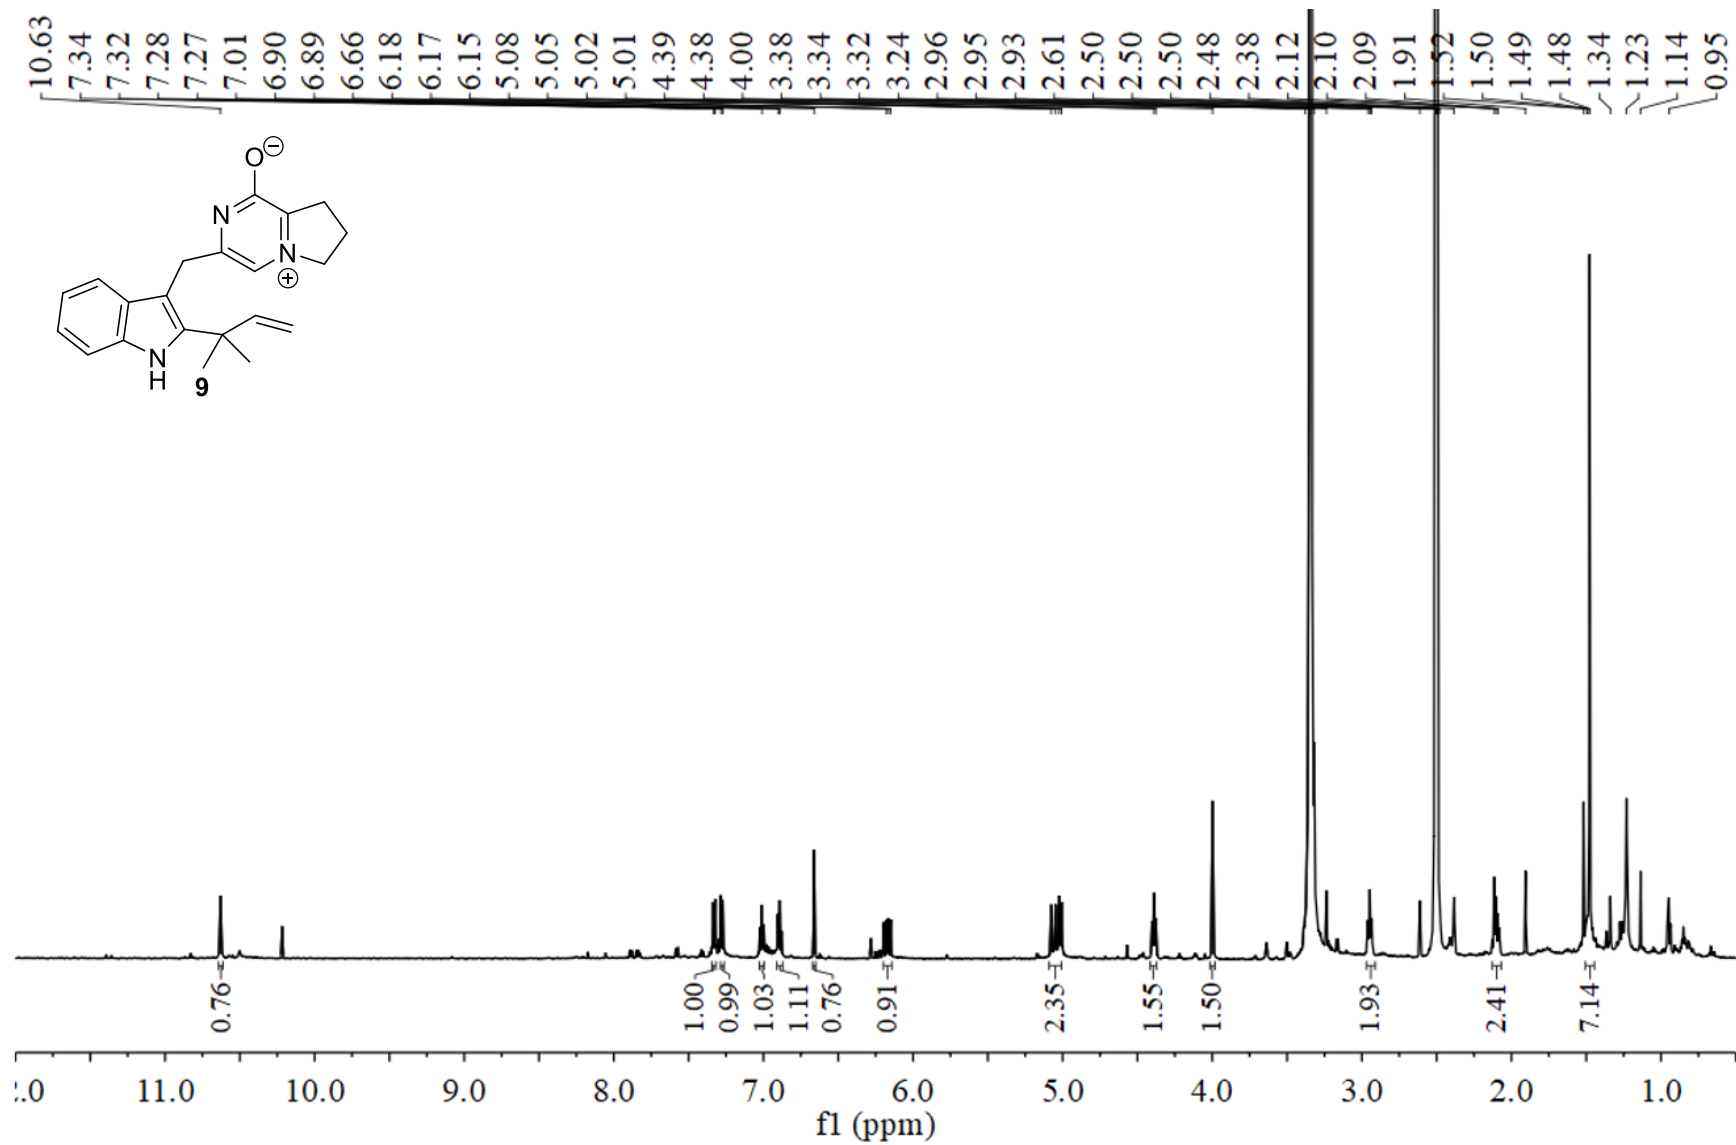

Supplementary Fig. 13-1 | <sup>1</sup>H NMR spectrum of 9 in DMSO-d<sub>6</sub>.



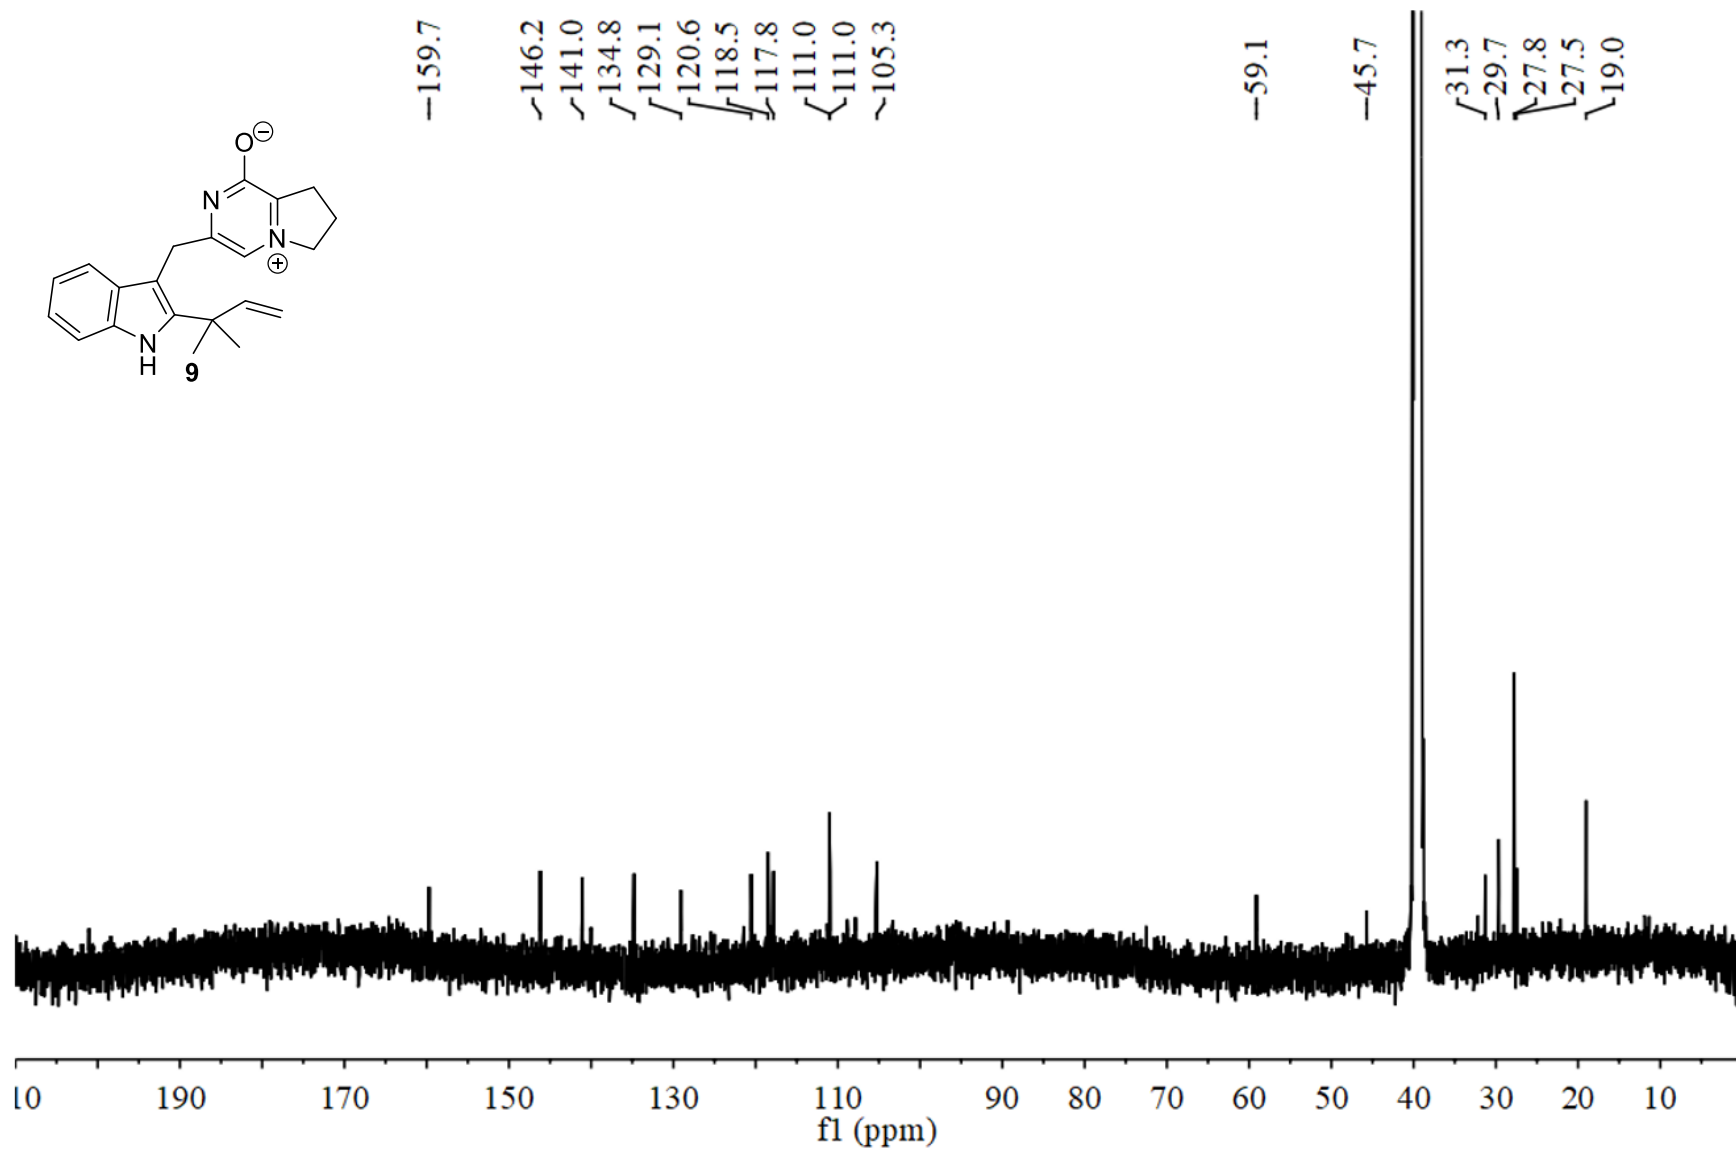

Supplementary Fig. 13-2 |  $^{13}\text{C}$  NMR spectrum of 9 in  $\text{DMSO-}d_6$ .

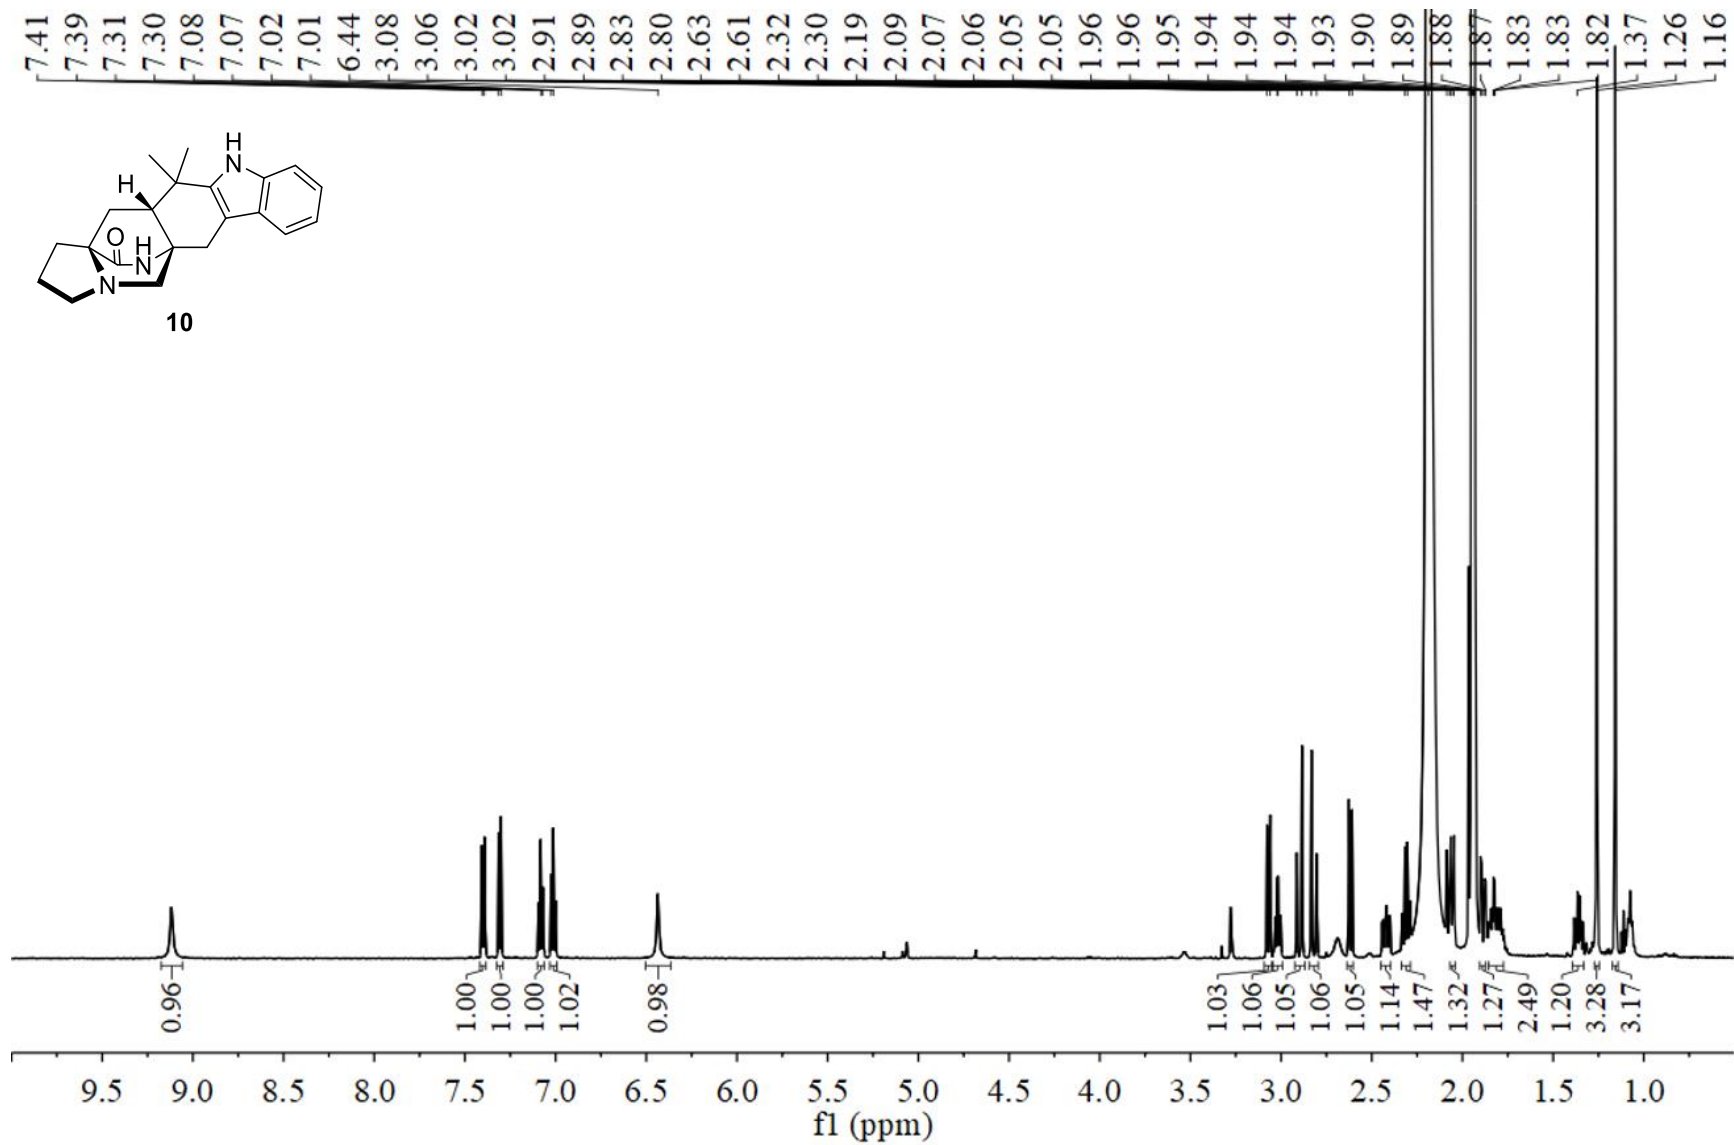

Supplementary Fig. 14-1 |  $^1\text{H}$  NMR spectrum of 10 in  $\text{CD}_3\text{CN}$ .

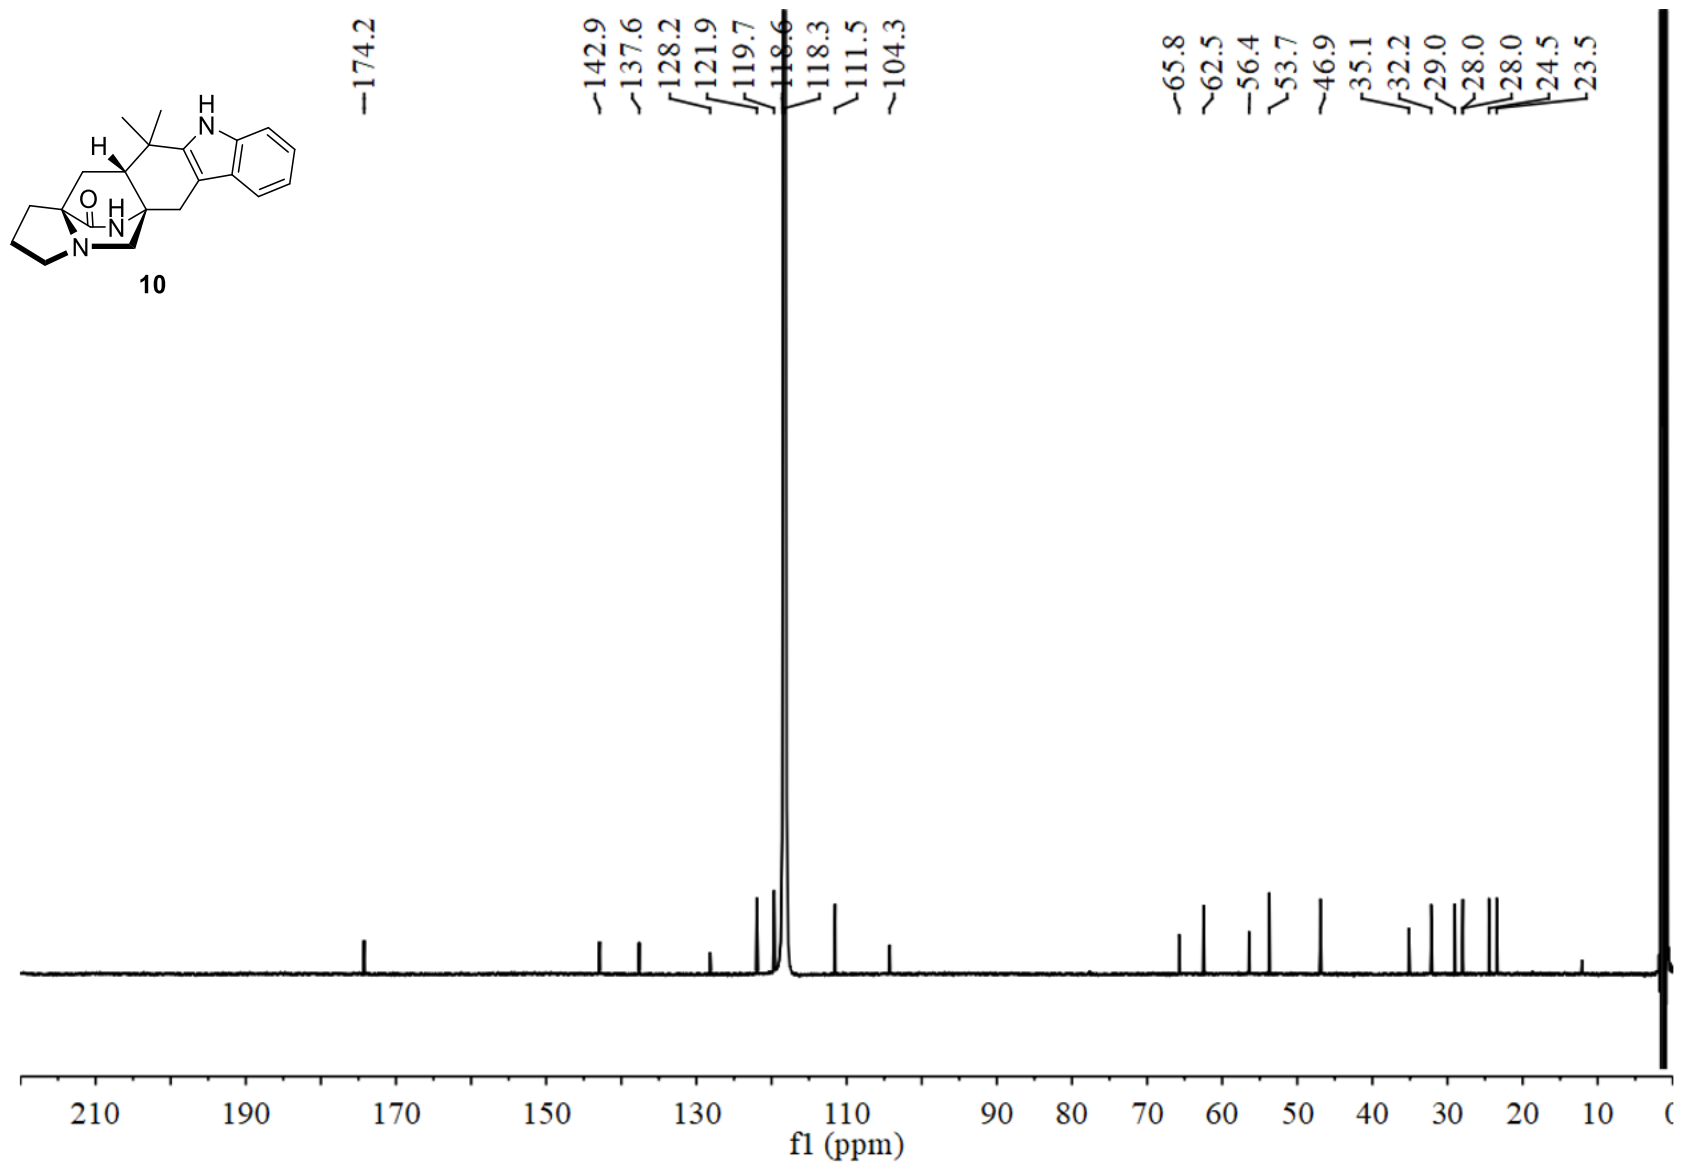

Supplementary Fig. 14-2 | <sup>13</sup>C NMR spectrum of 10 in CD<sub>3</sub>CN.

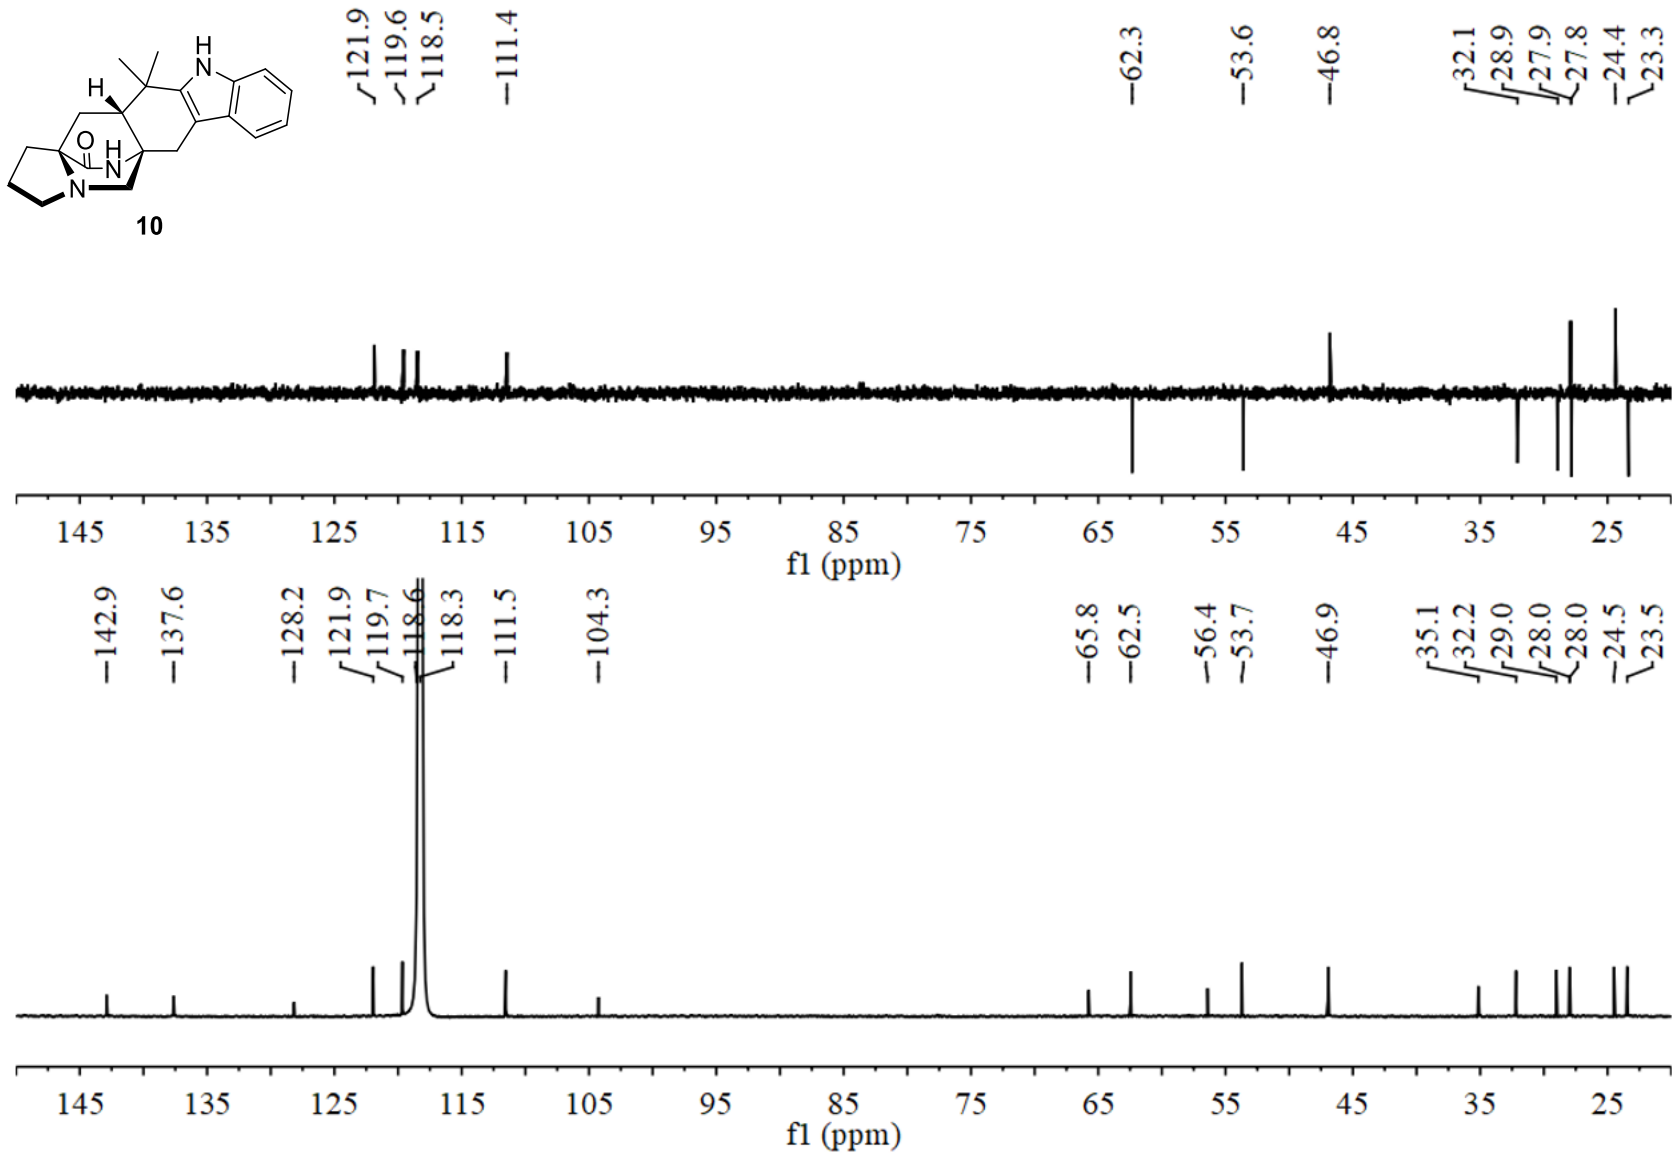

Supplementary Fig. 14-3 | DEPT135 and <sup>13</sup>C NMR spectra of 10 in CD<sub>3</sub>CN.

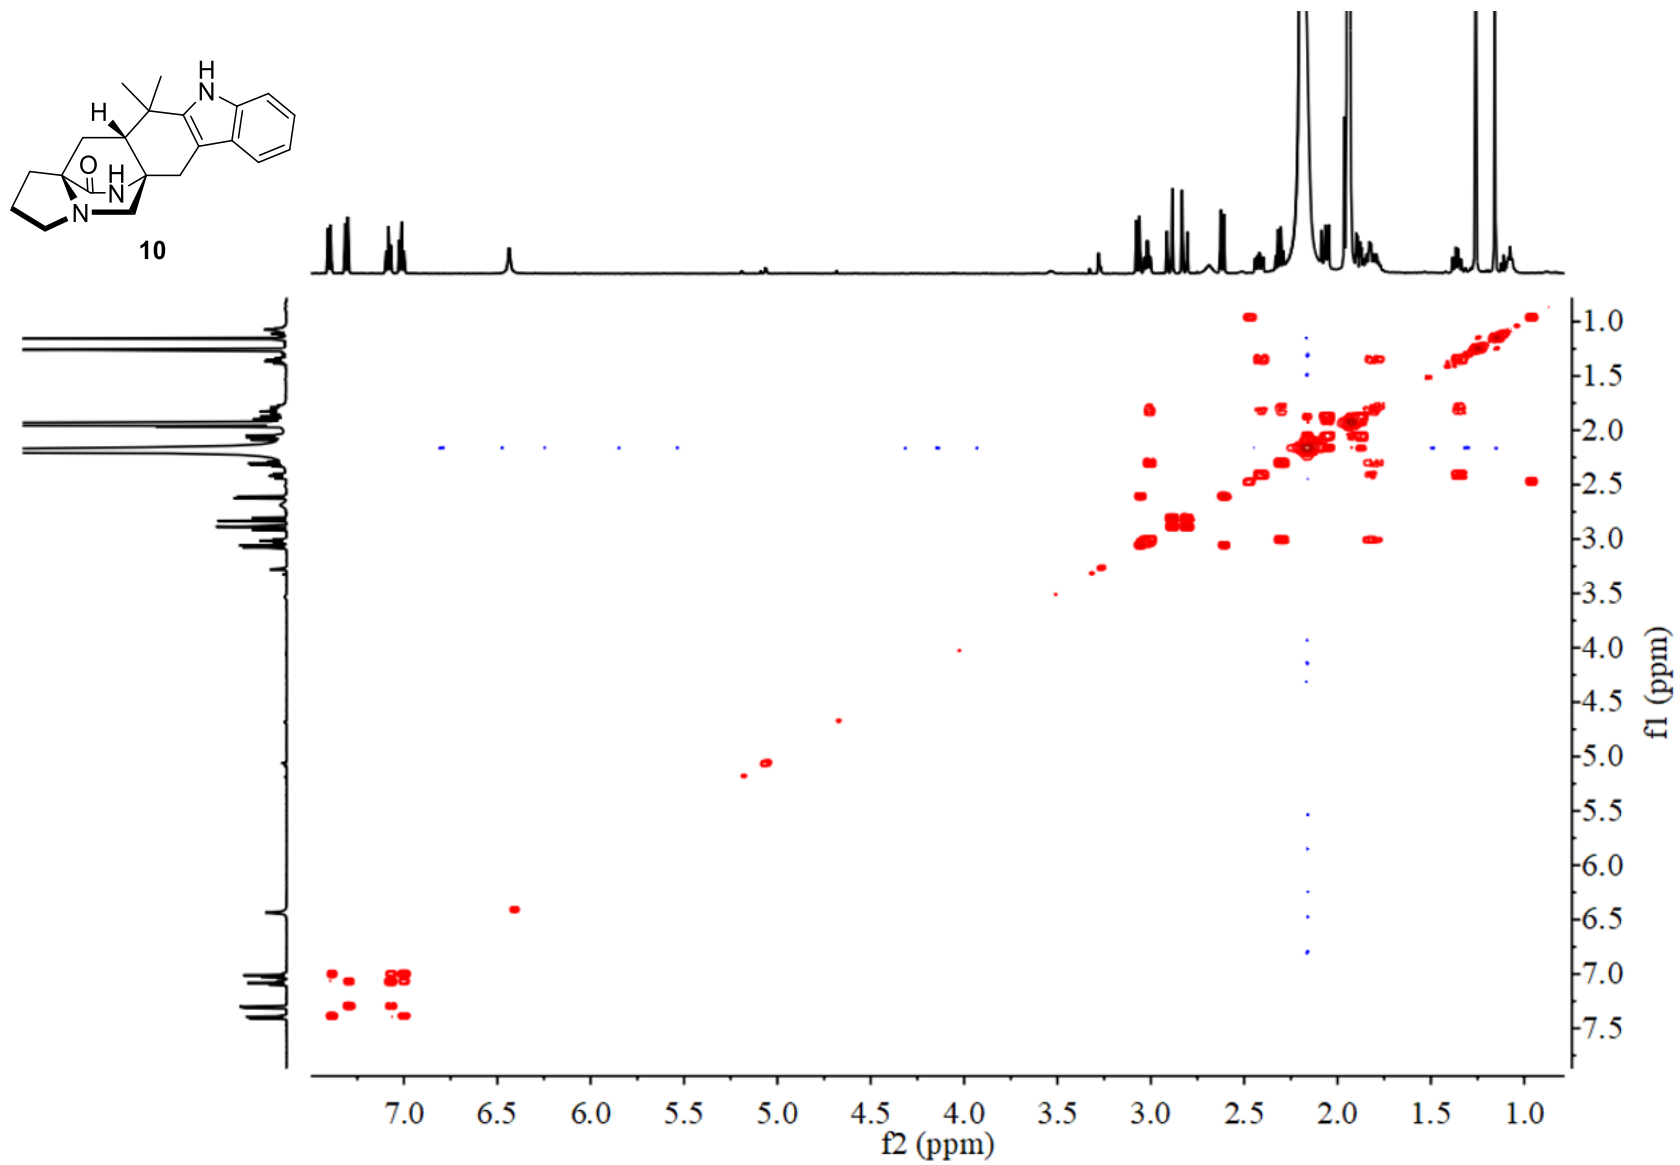

Supplementary Fig. 14-4 |  $^1\text{H}$ - $^1\text{H}$  COSY NMR spectrum of 10 in  $\text{CD}_3\text{CN}$ .

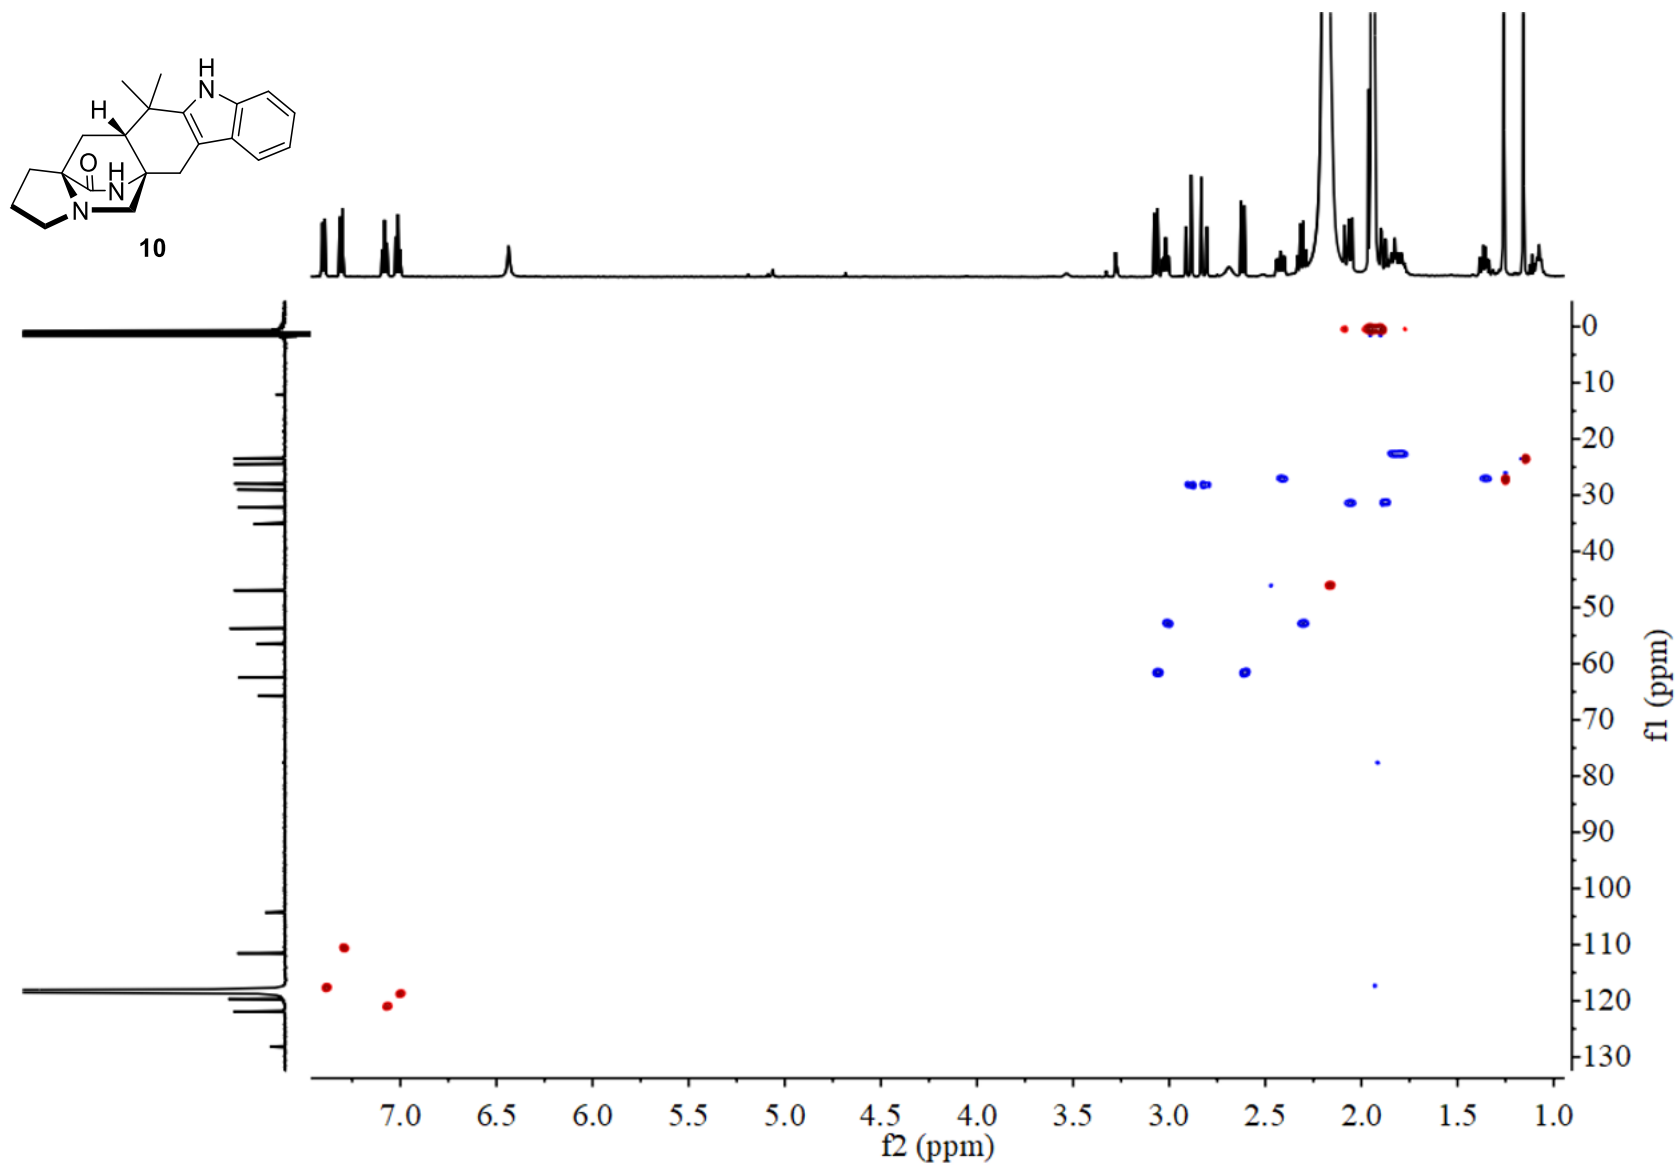

Supplementary Fig. 14-5 | HSQC NMR spectrum of 10 in CD<sub>3</sub>CN.

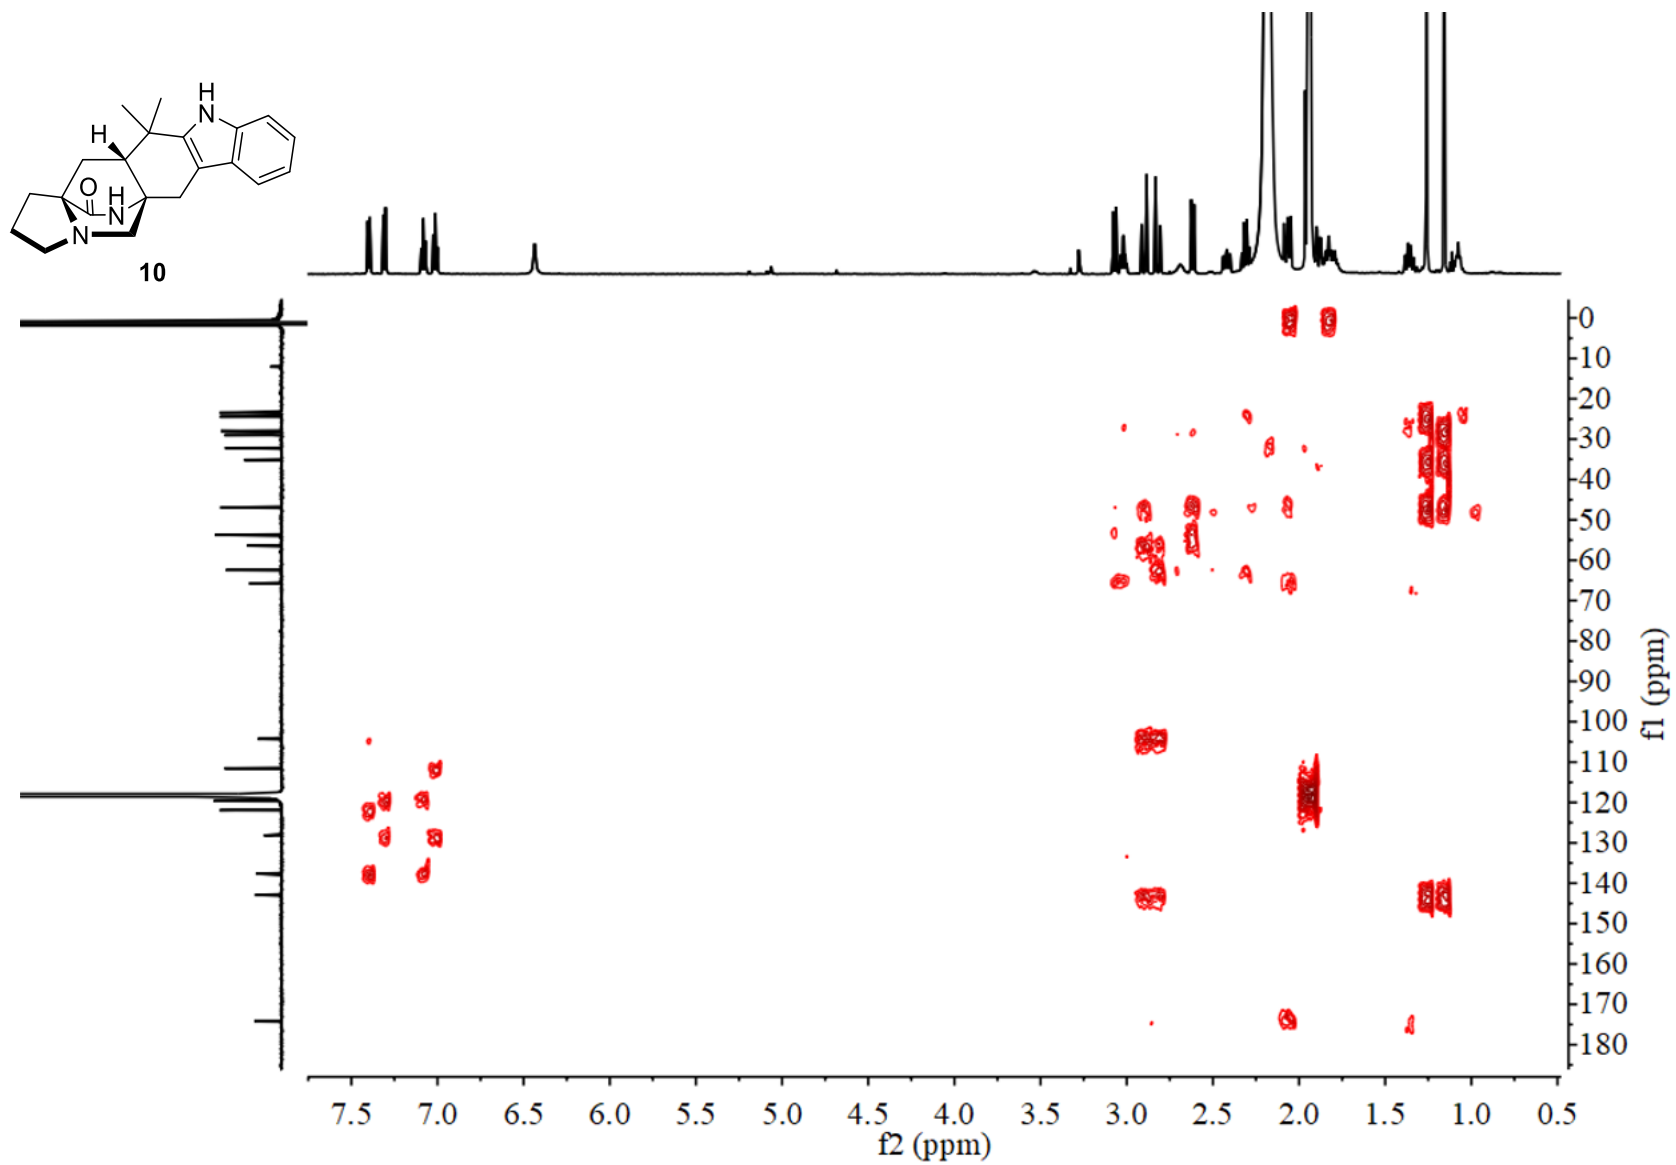

Supplementary Fig. 14-6 | HMBC NMR spectrum of 10 in CD<sub>3</sub>CN.

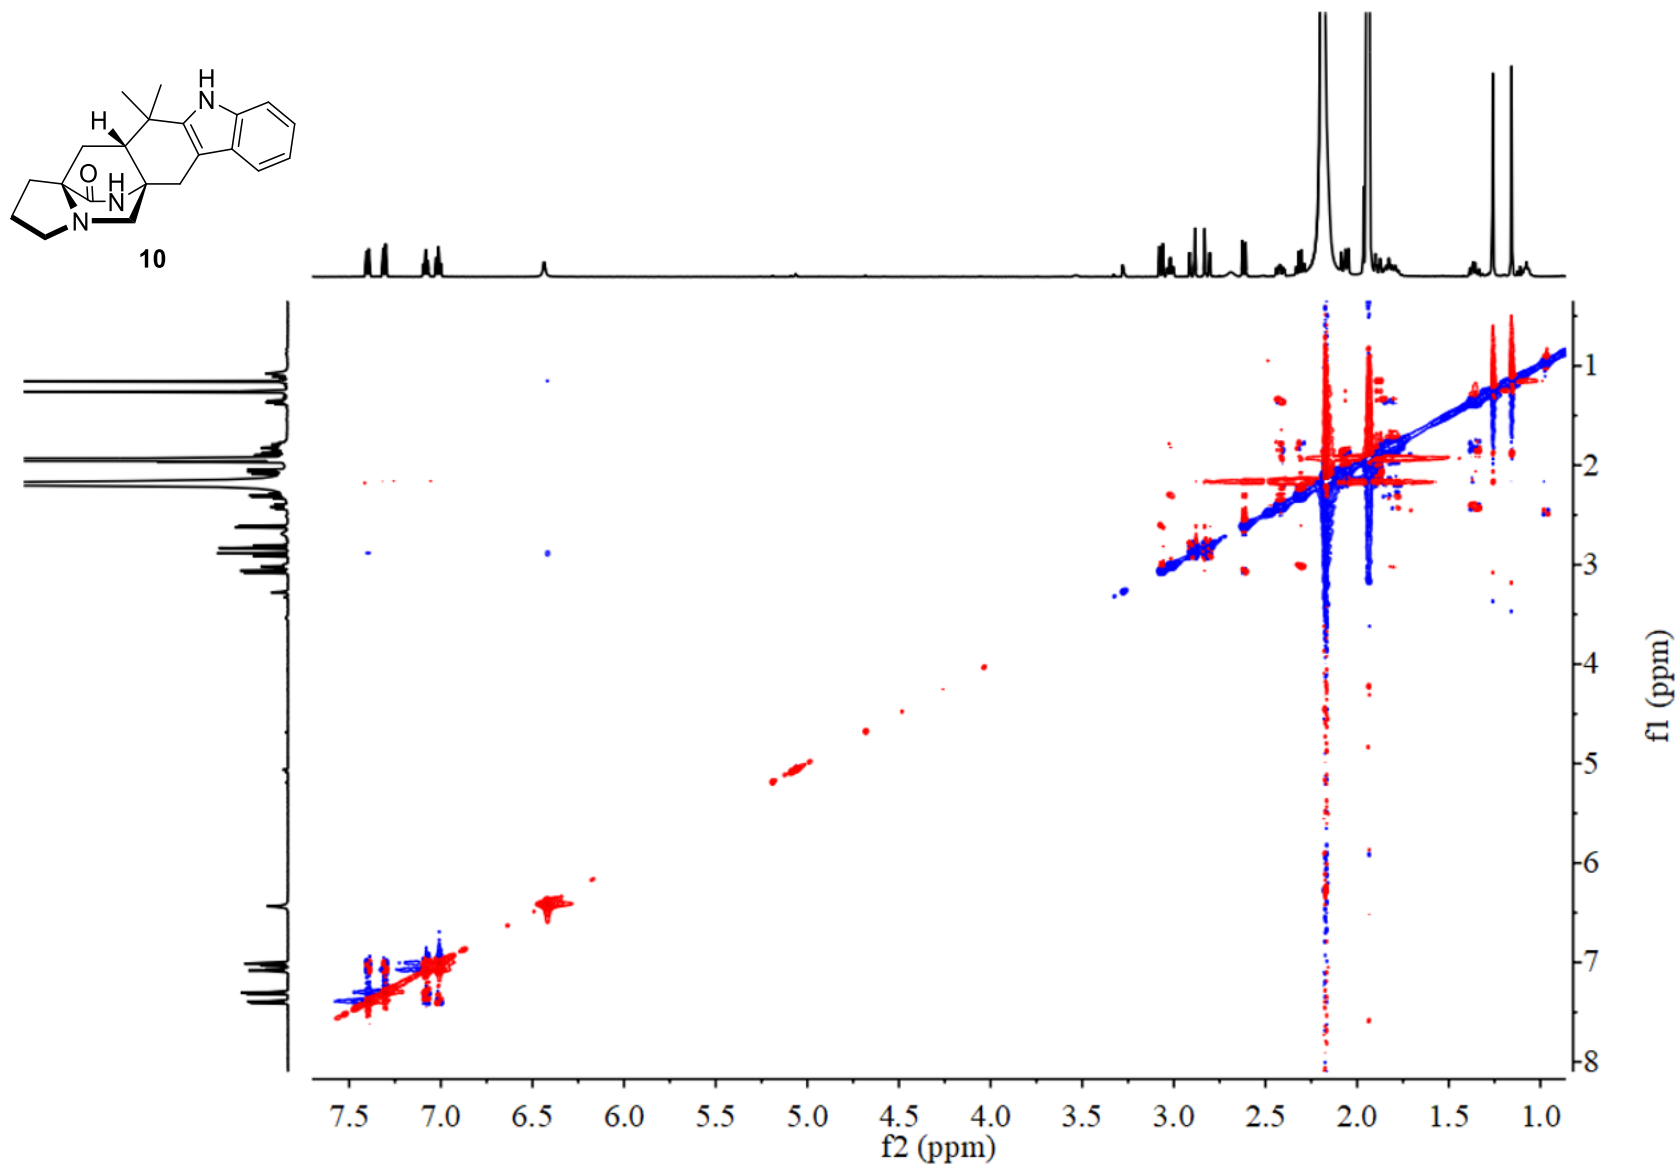

Supplementary Fig. 14-7 | NOESY NMR spectrum of 10 in CD<sub>3</sub>CN.



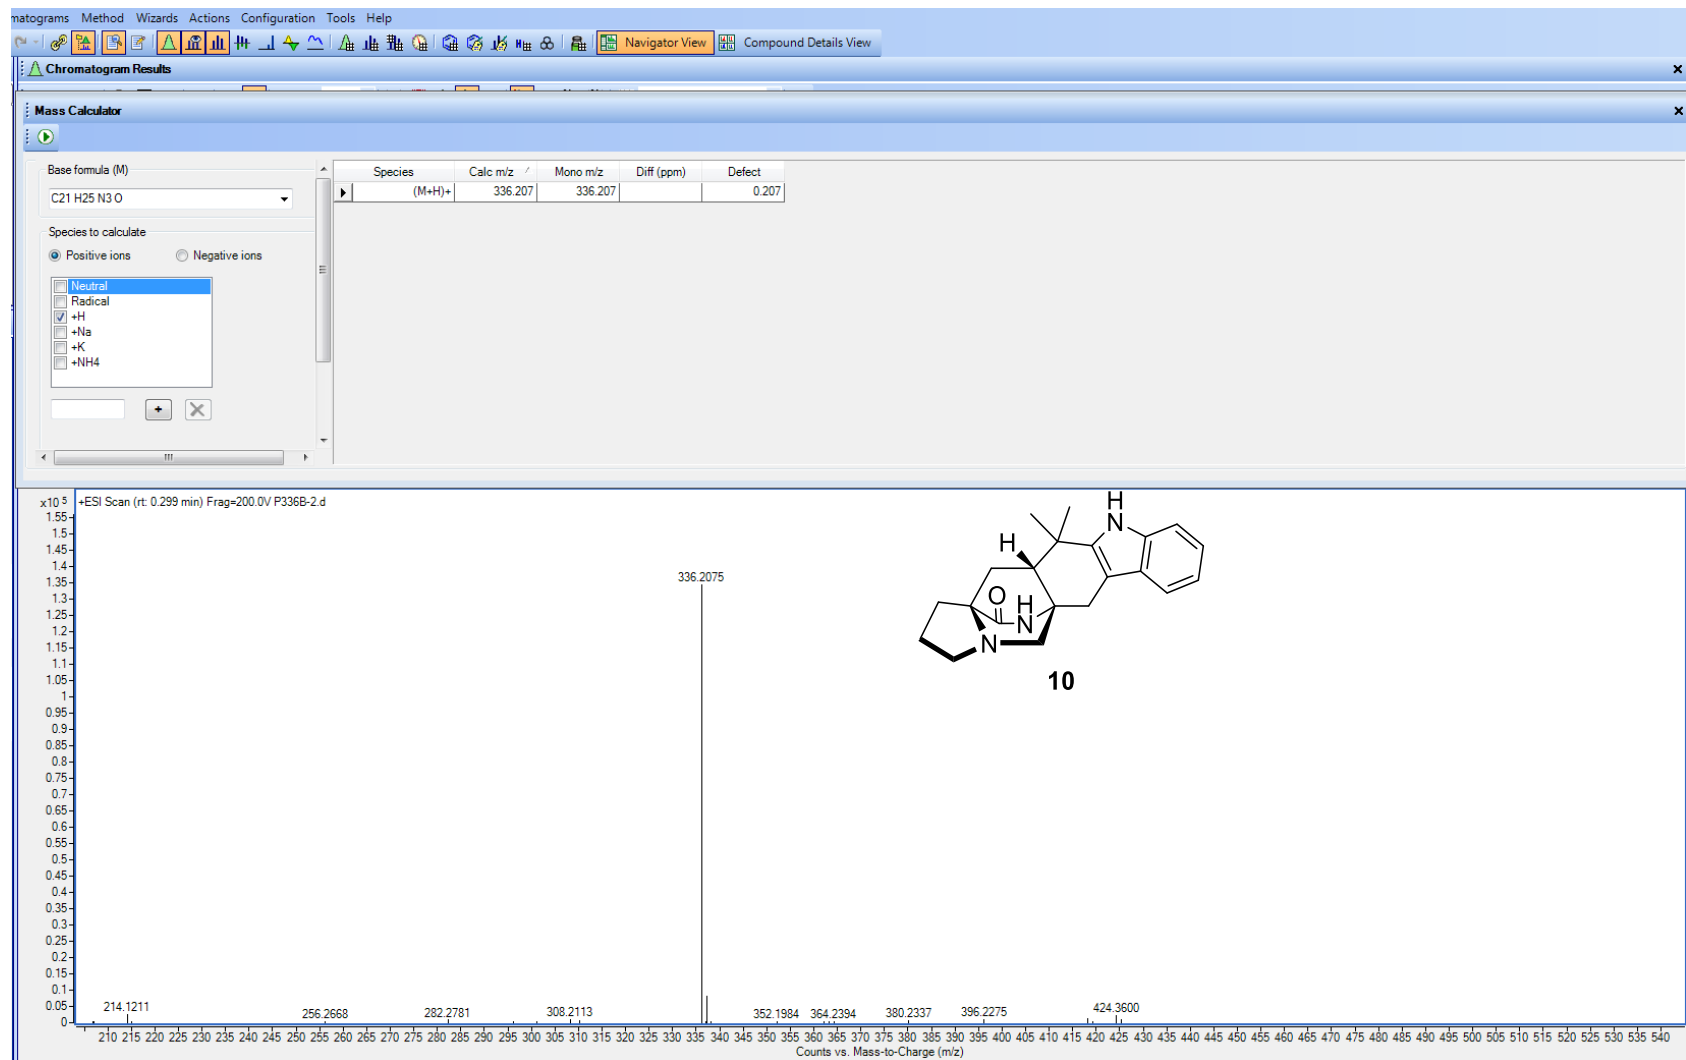

Supplementary Fig. 14-8 | HRMS spectrum of 10.

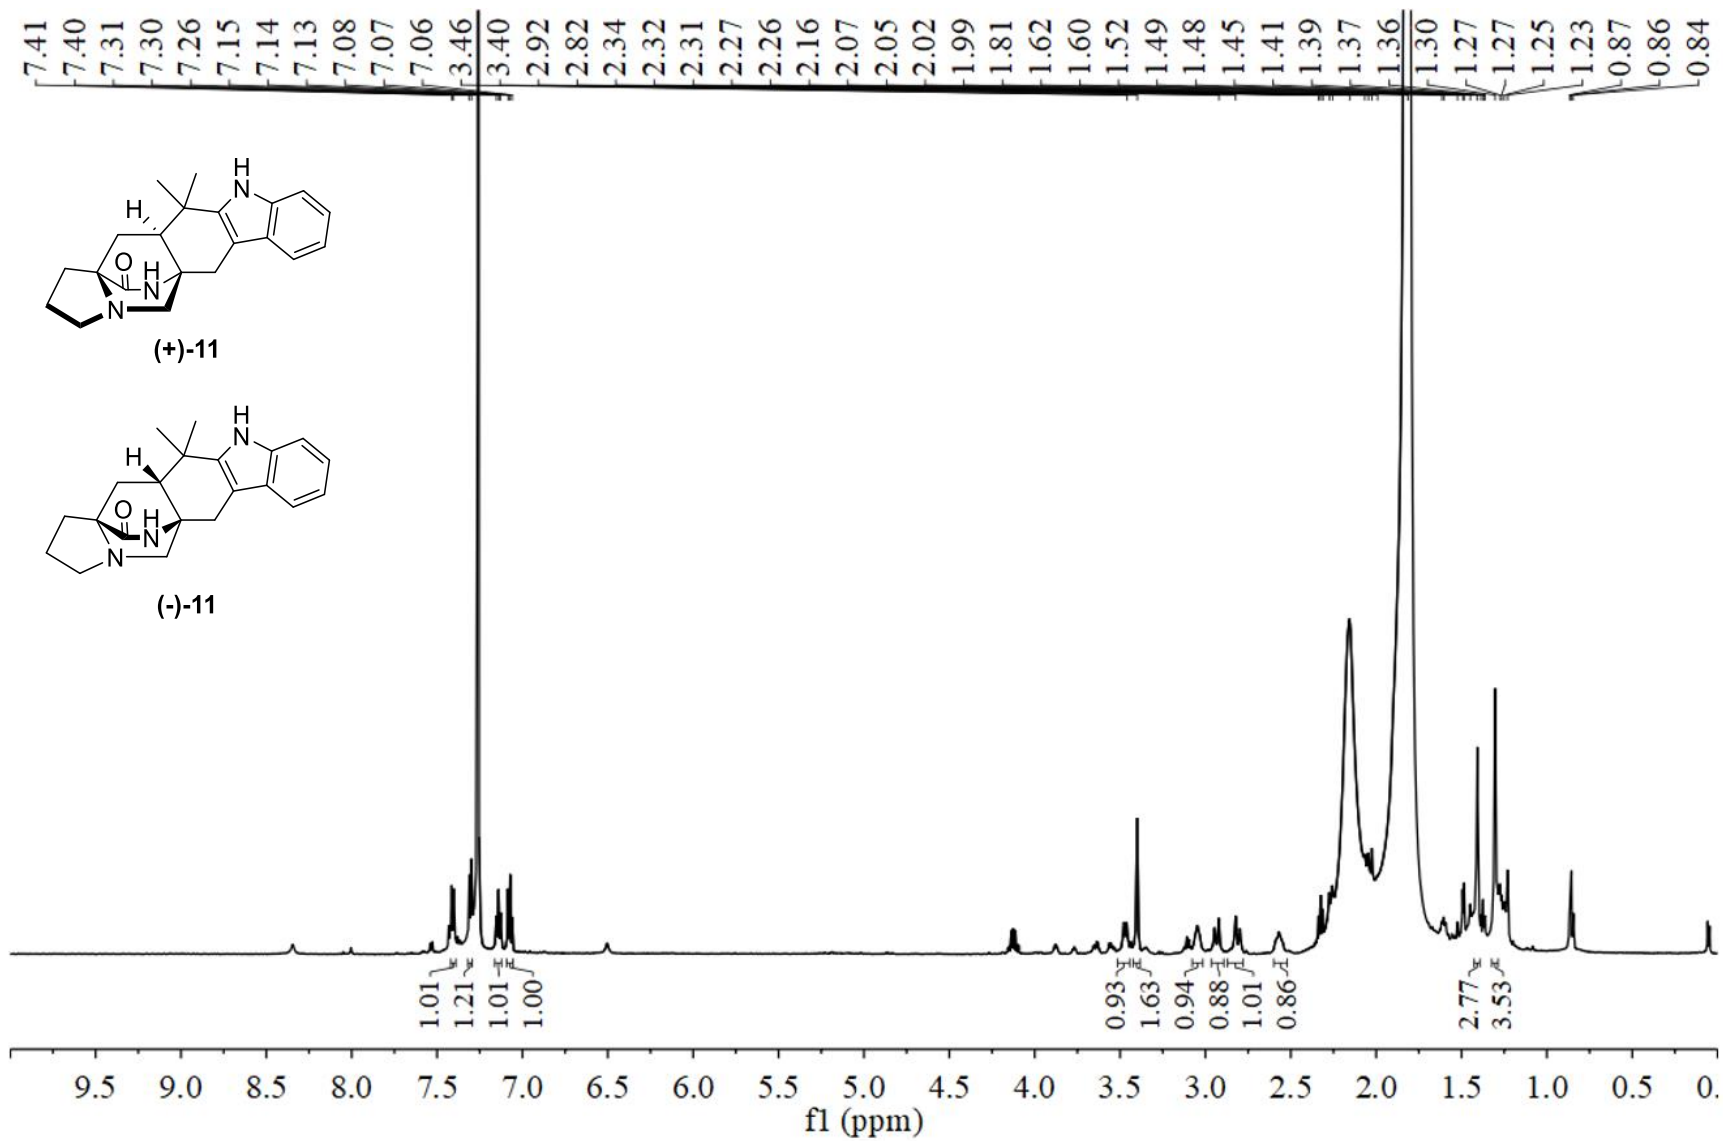

Supplementary Fig. 15-1 | <sup>1</sup>H NMR spectrum of 11 in CD<sub>3</sub>CD/CDCl<sub>3</sub> (1/10).

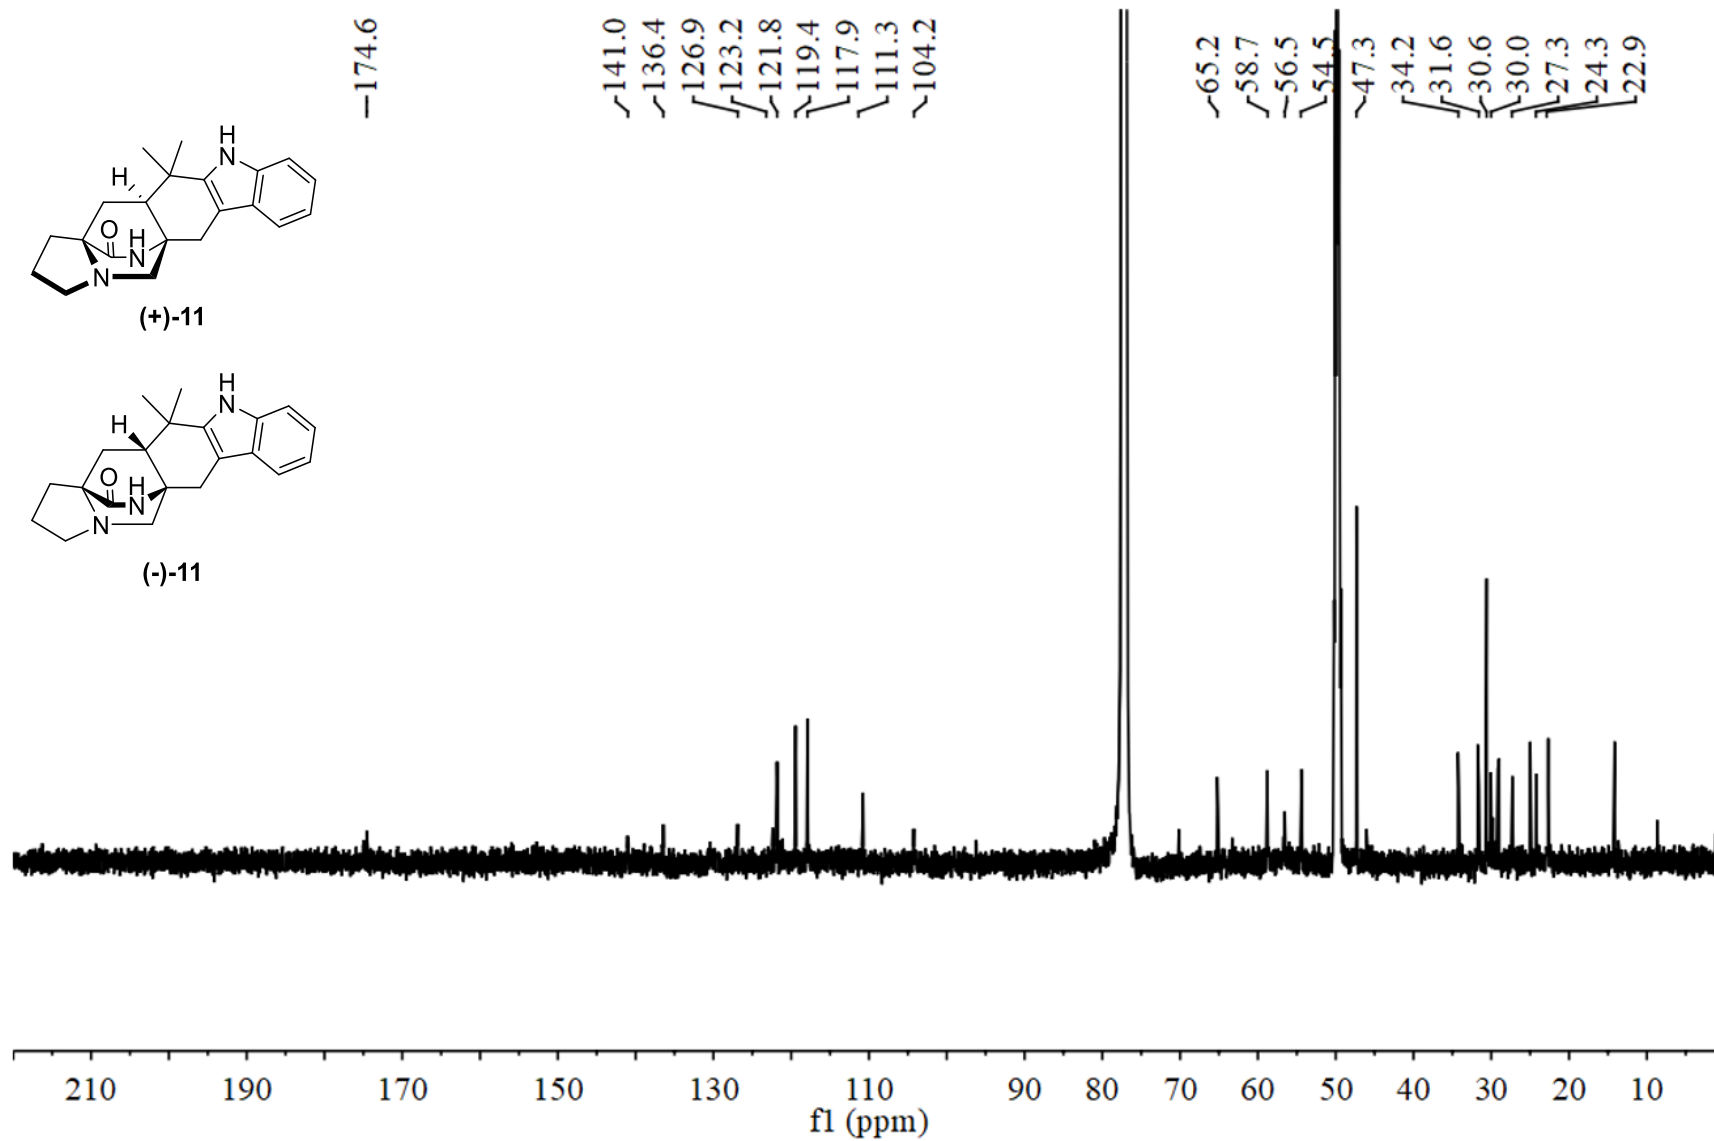

Supplementary Fig. 15-2 | <sup>13</sup>C NMR spectrum of 11 in CD<sub>3</sub>CD/CDCl<sub>3</sub> (1/10)<sup>2</sup>.

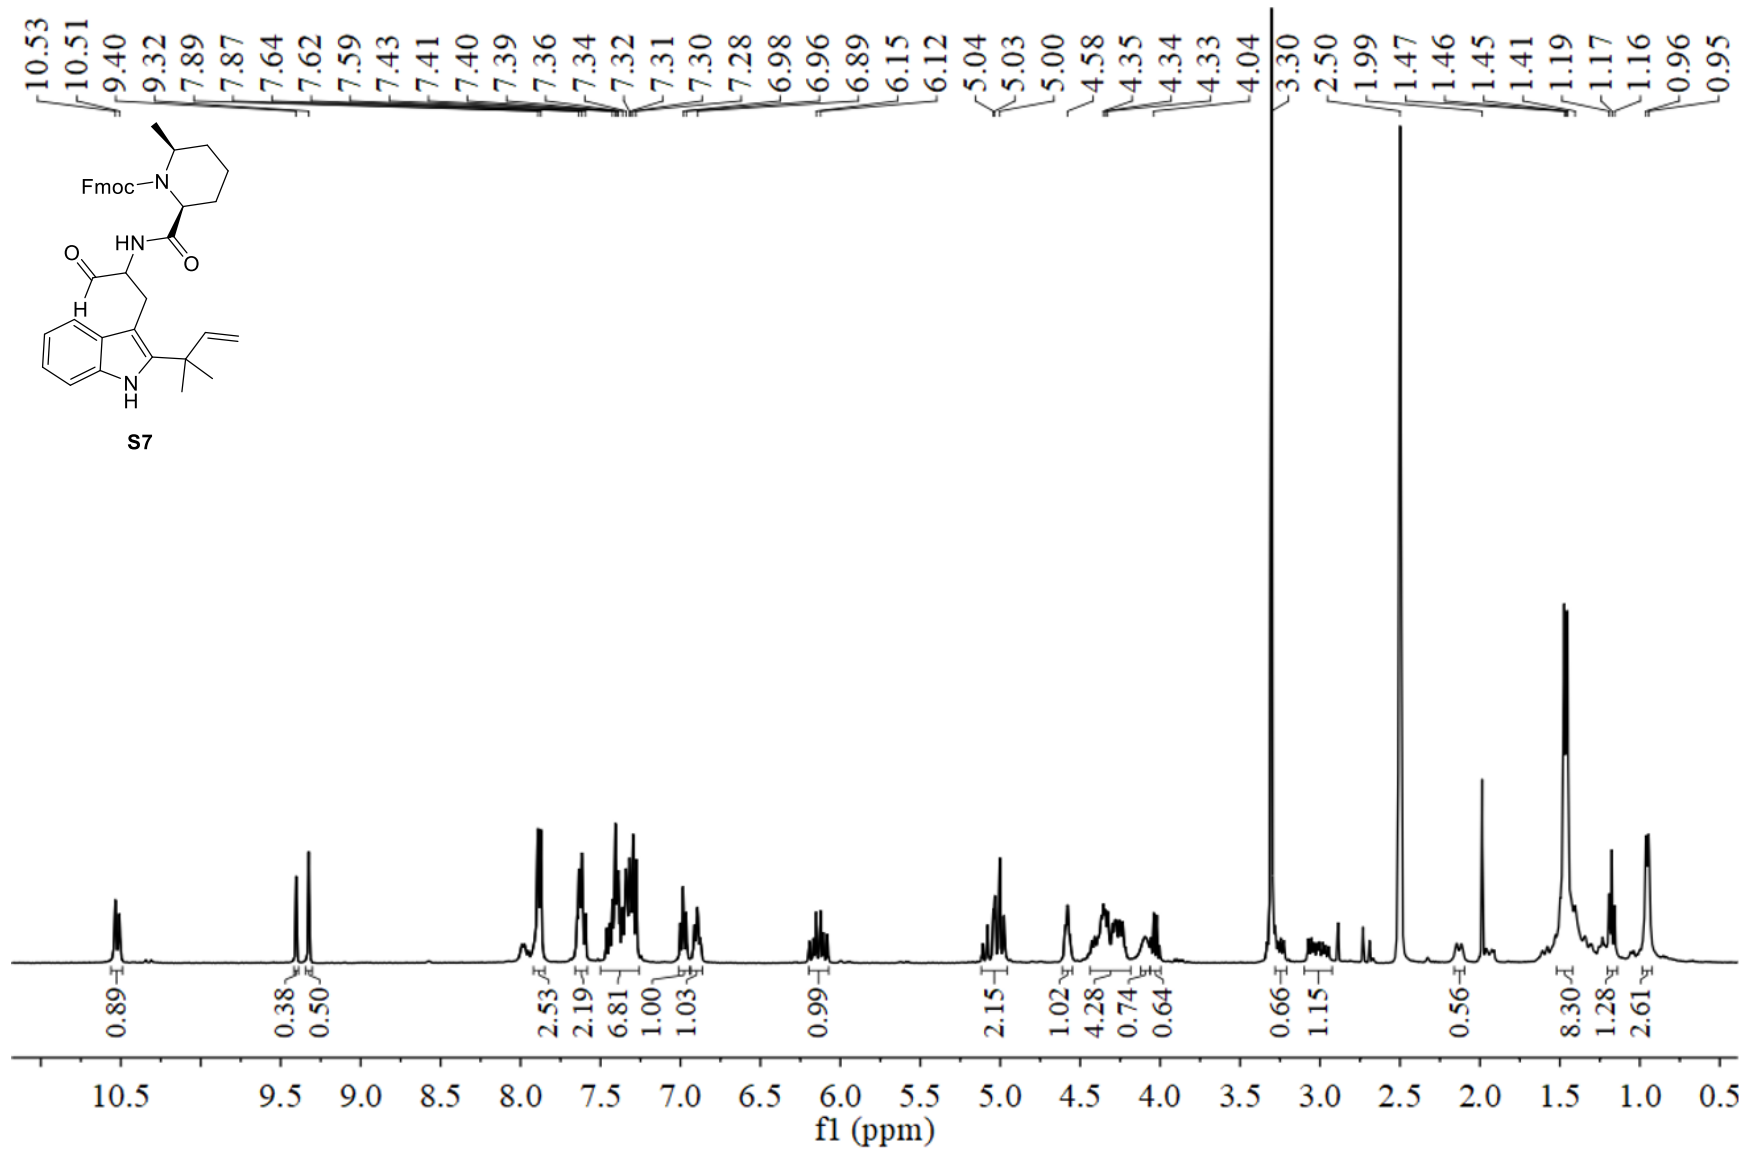

Supplementary Fig. 16-1 | <sup>1</sup>H NMR spectrum of S7 in DMSO-*d*<sub>6</sub>.

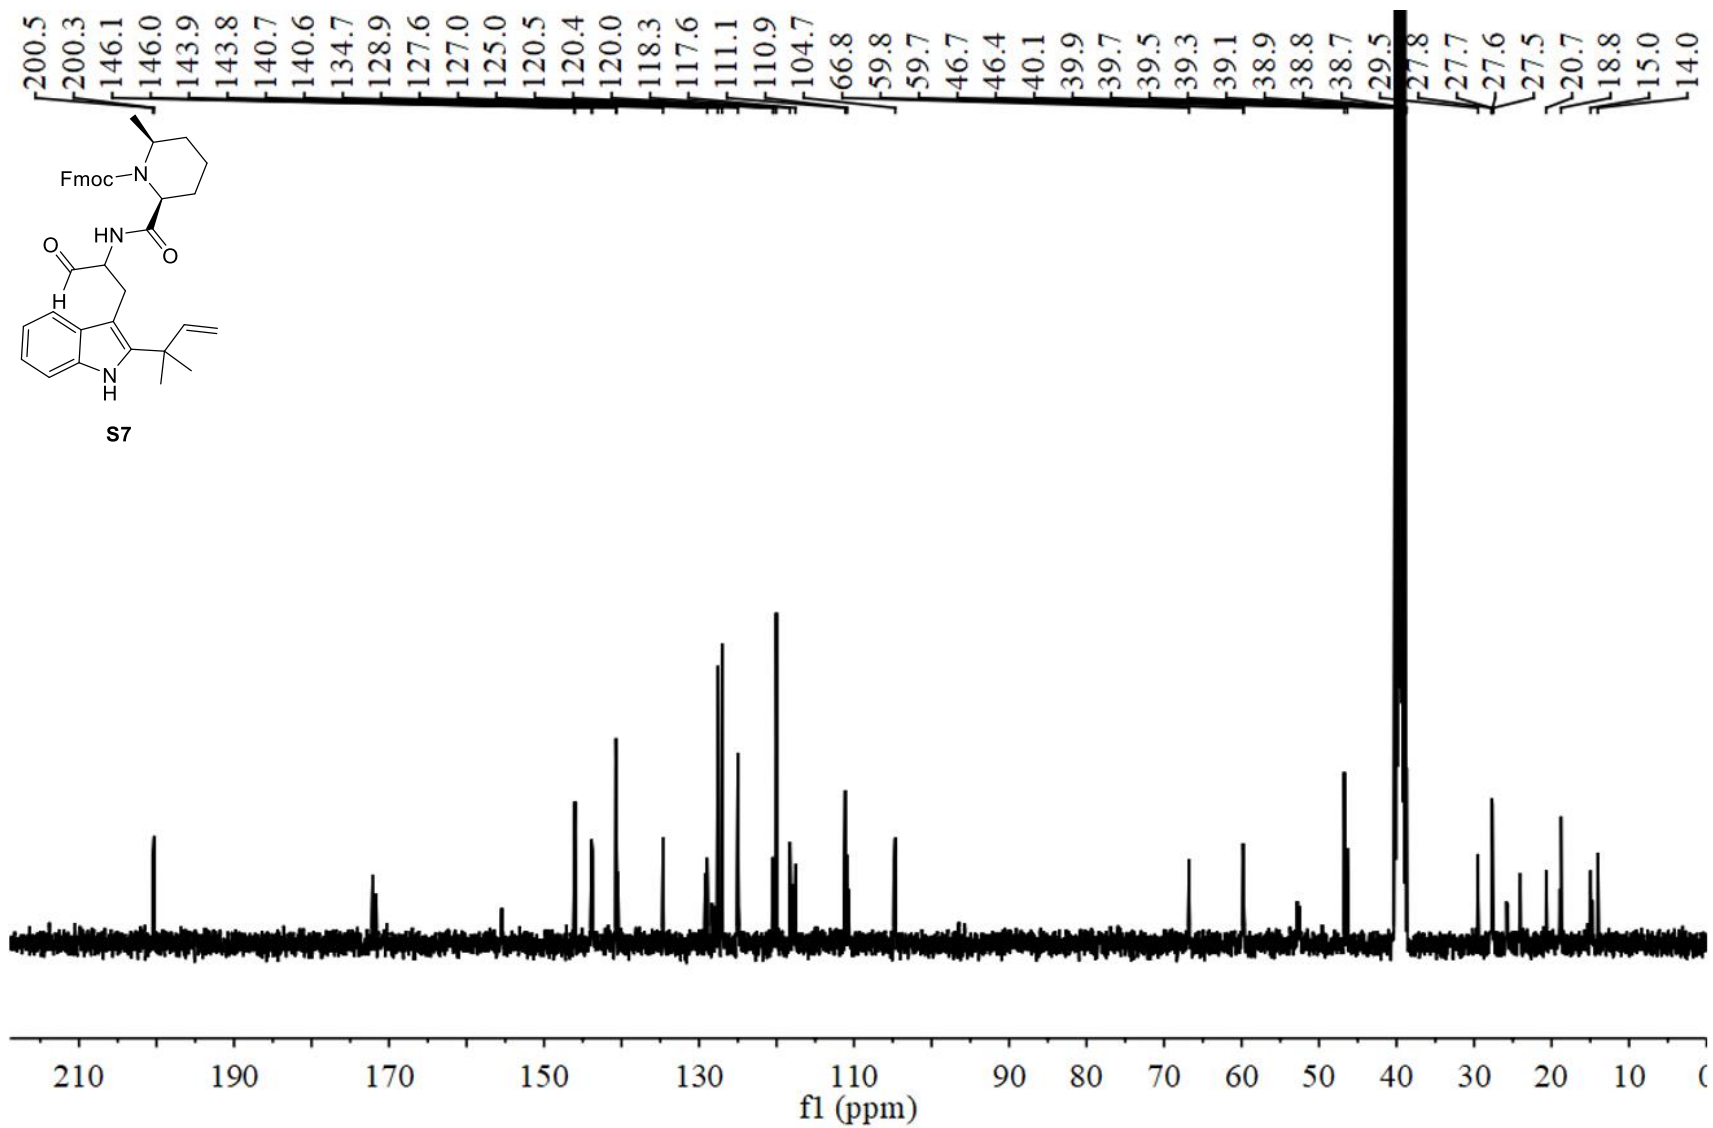

Supplementary Fig. 16-2 |  $^{13}\text{C}$  NMR spectrum of S7 in  $\text{DMSO-}d_6$ .

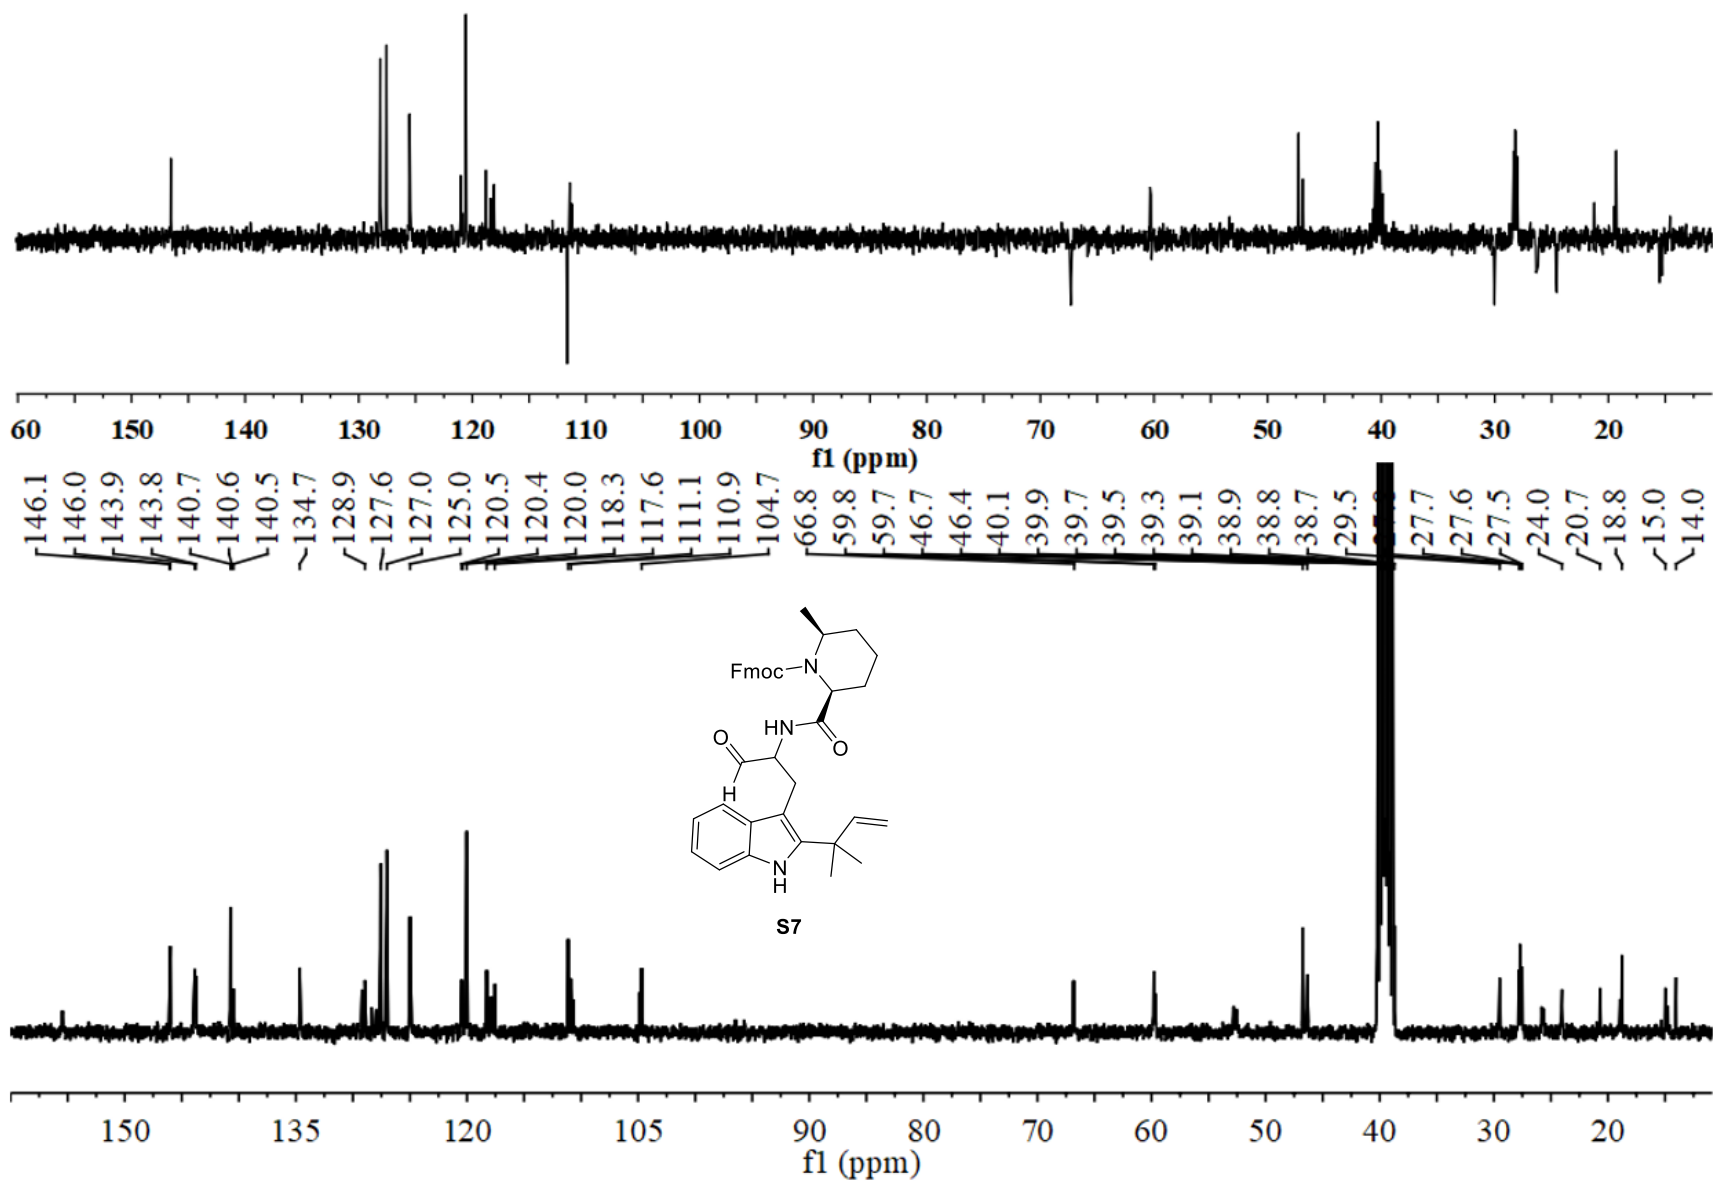

Supplementary Fig. 16-3 | DEPT135 and <sup>13</sup>C NMR spectra of S7 in DMSO-*d*<sub>6</sub>.

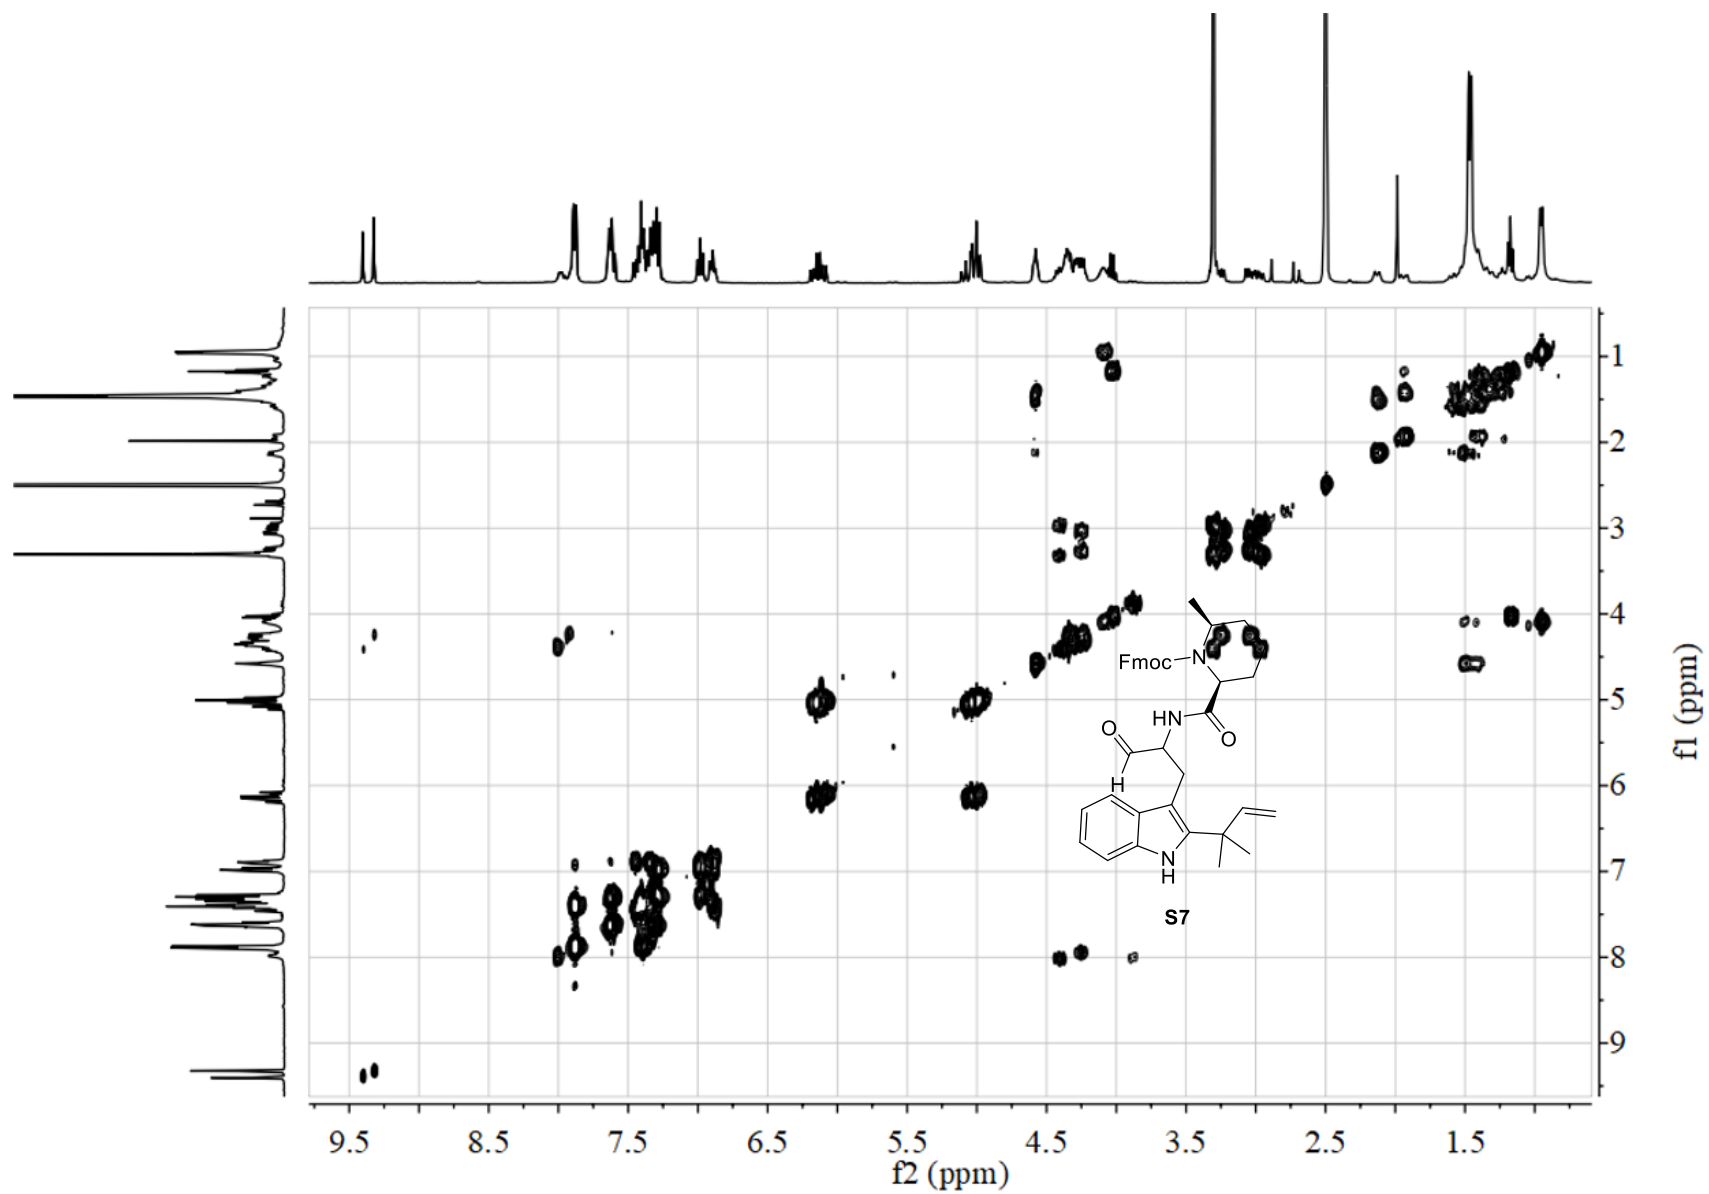

Supplementary Fig. 16-4 |  $^1\text{H}$ - $^1\text{H}$  COSY NMR spectrum of S7 in  $\text{DMSO-}d_6$ .

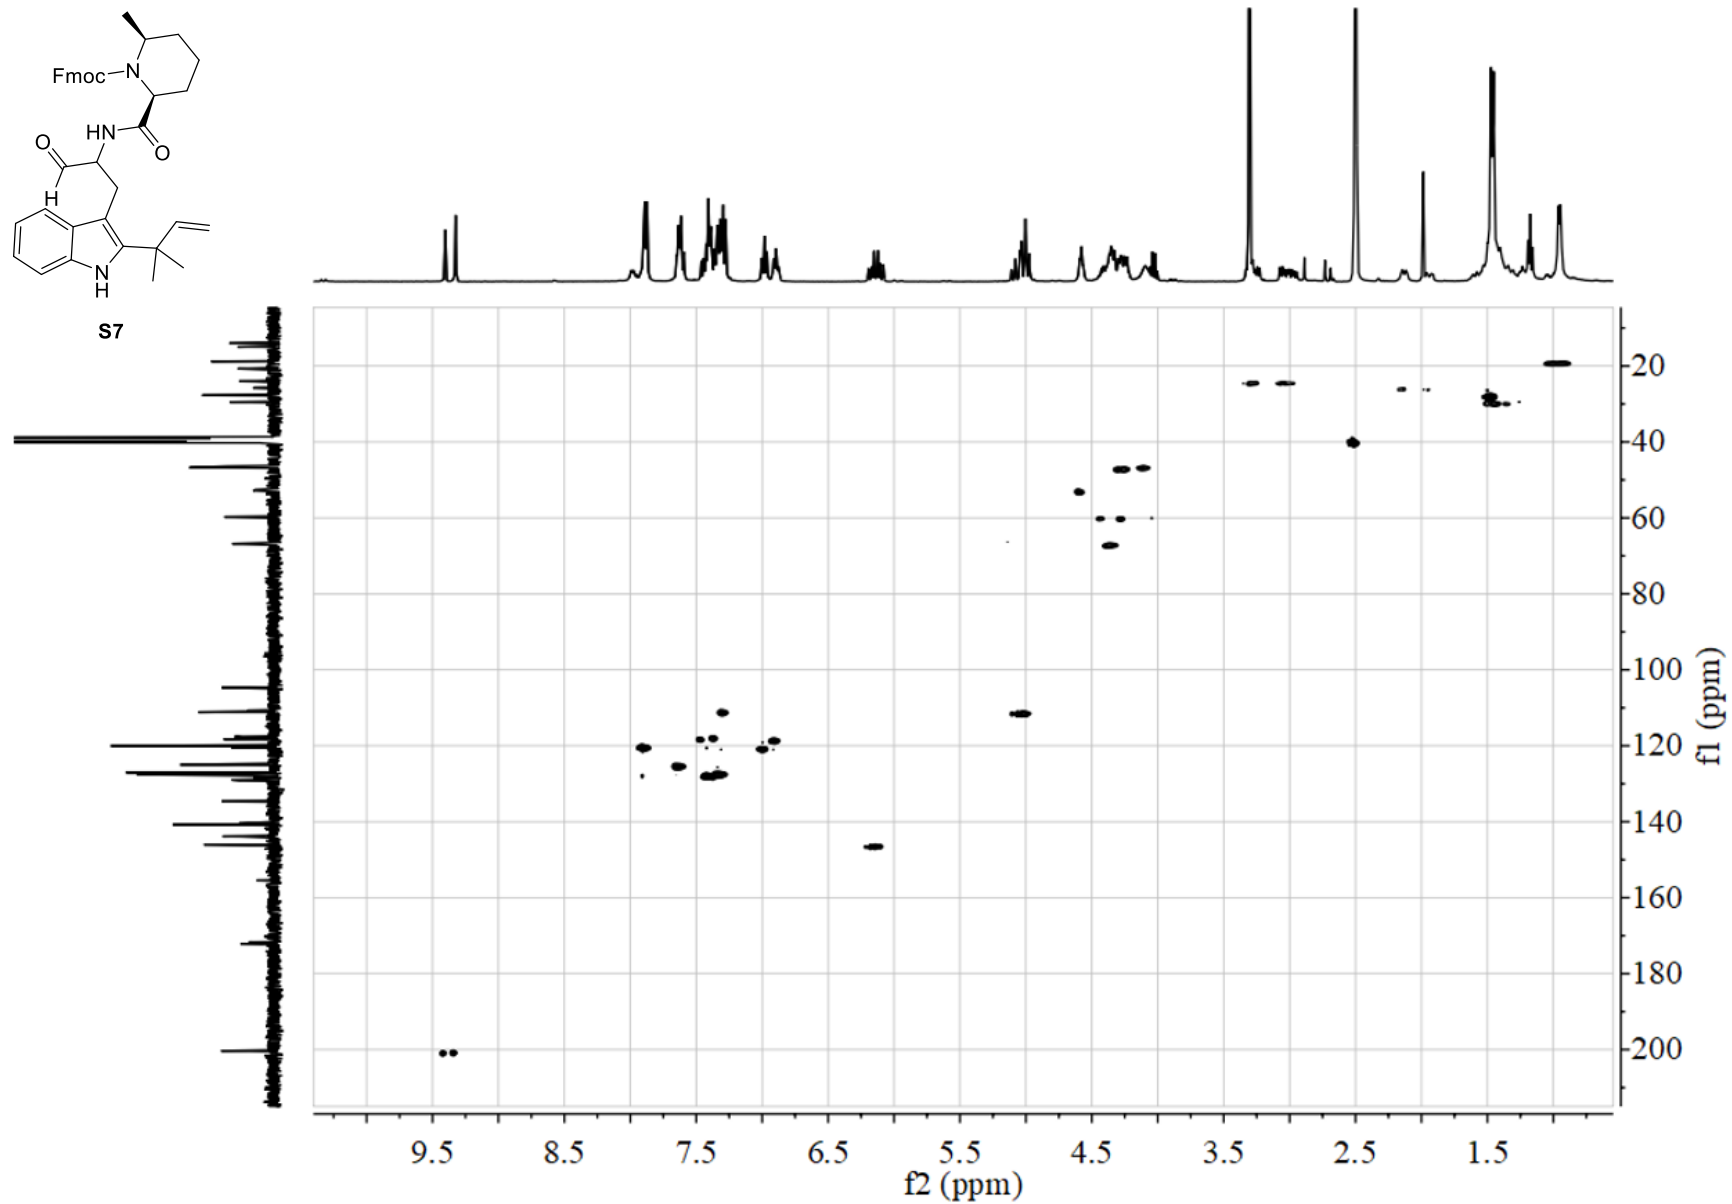

Supplementary Fig. 16-5 | HSQC NMR spectrum of S7 in DMSO-*d*<sub>6</sub>.



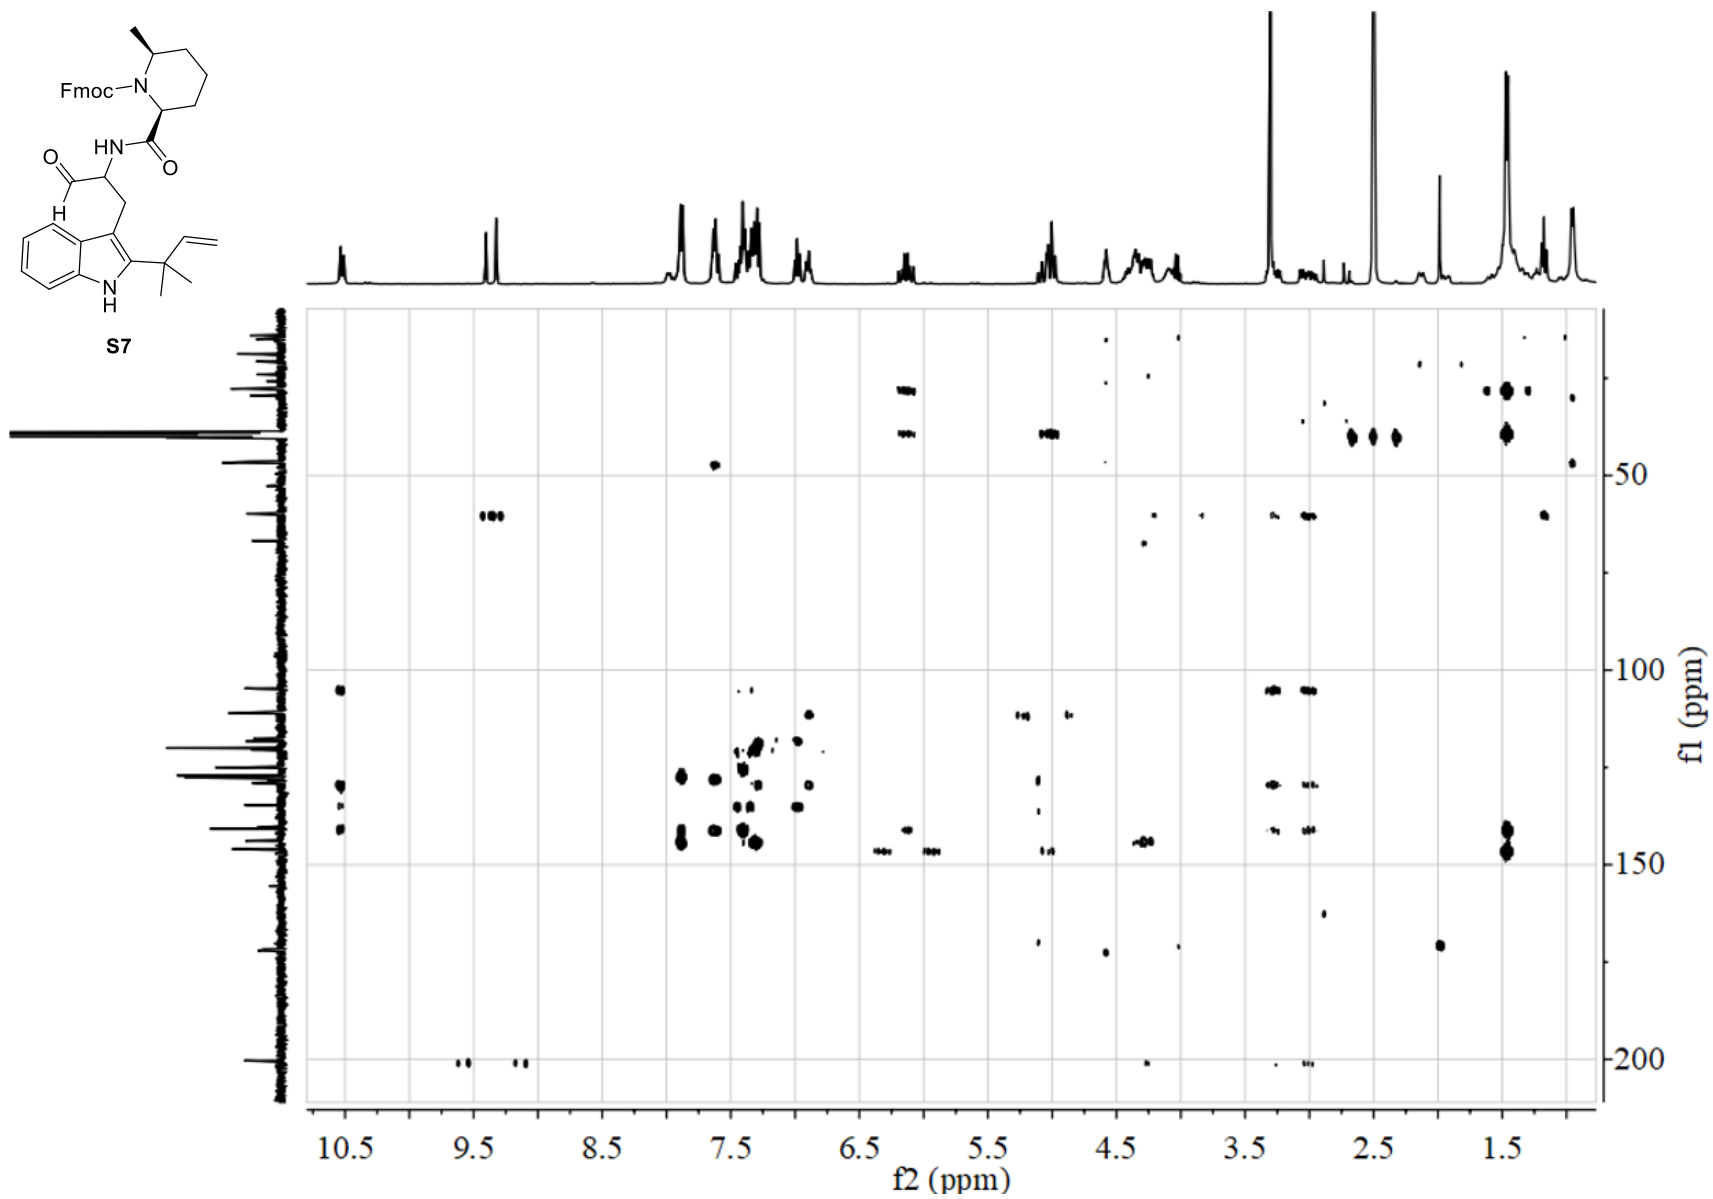

Supplementary Fig. 16-6 | HMBC NMR spectrum of S7 in DMSO-*d*<sub>6</sub>.



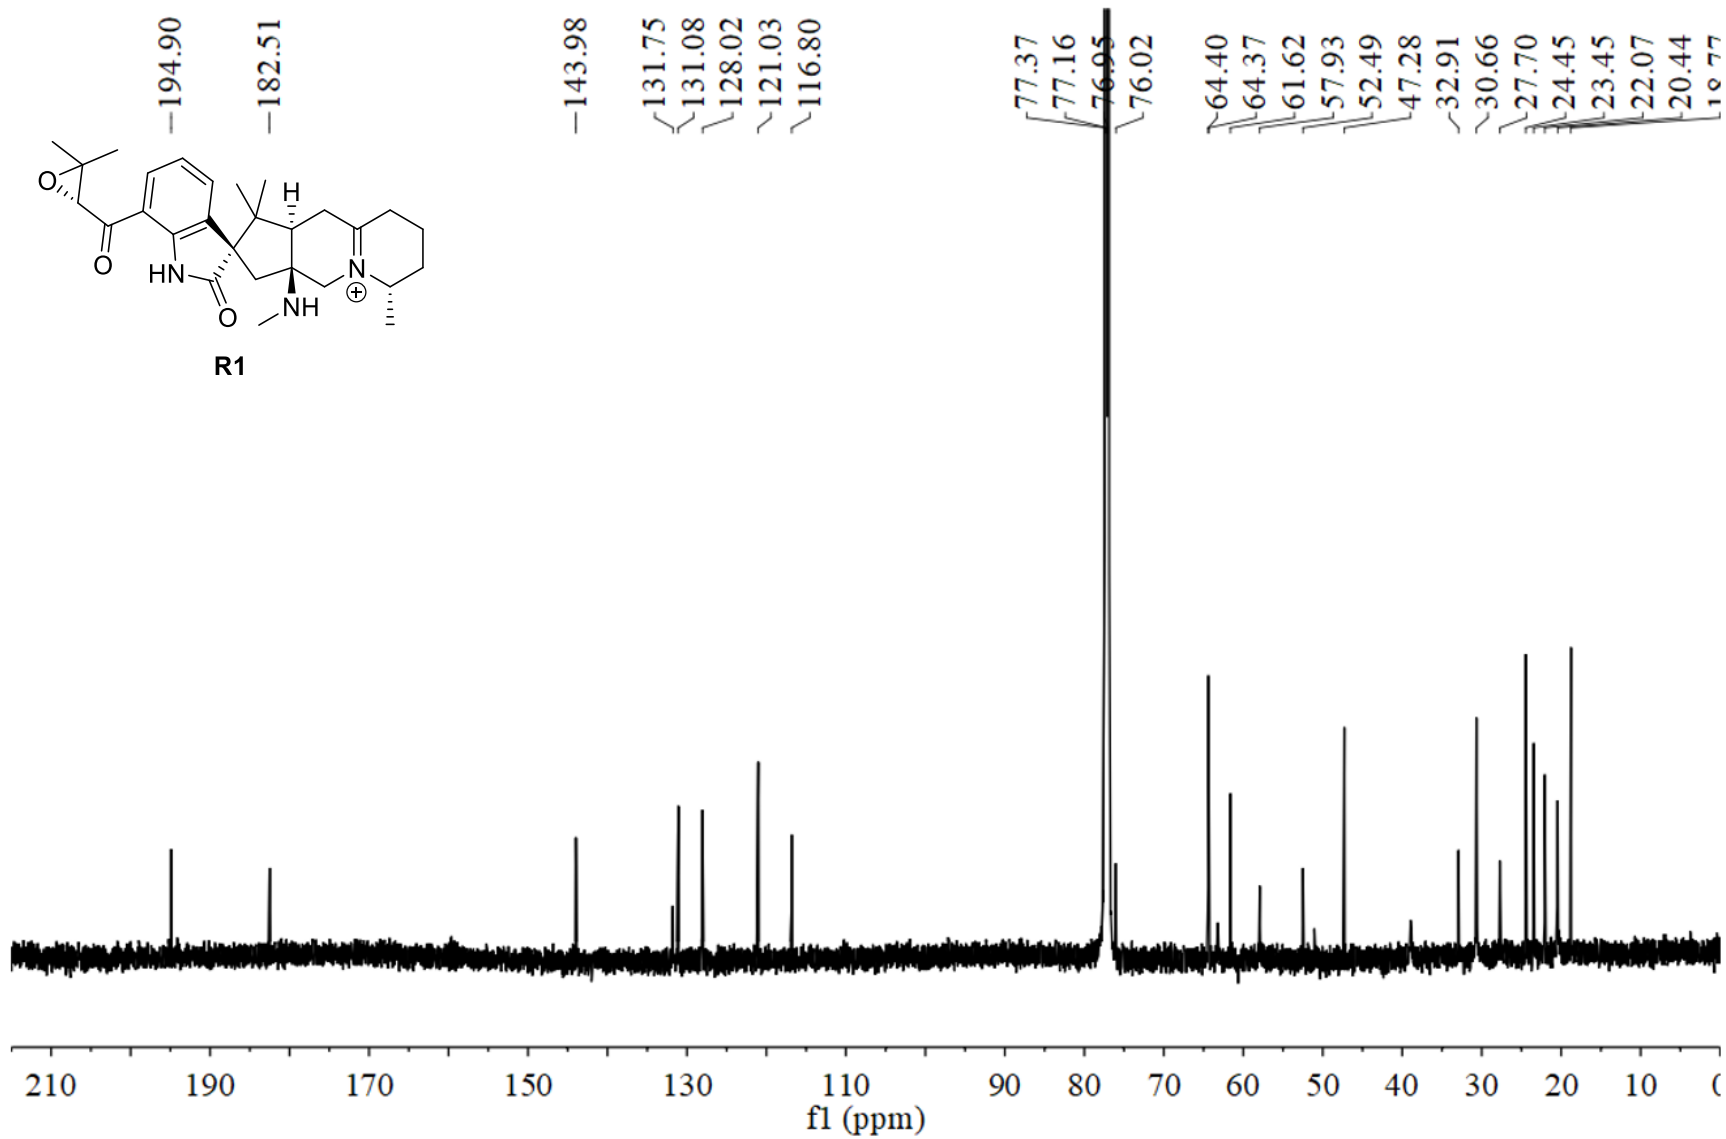

Supplementary Fig. 17-2 |  $^{13}\text{C}$  NMR spectrum of R1 in  $\text{CDCl}_3$ .

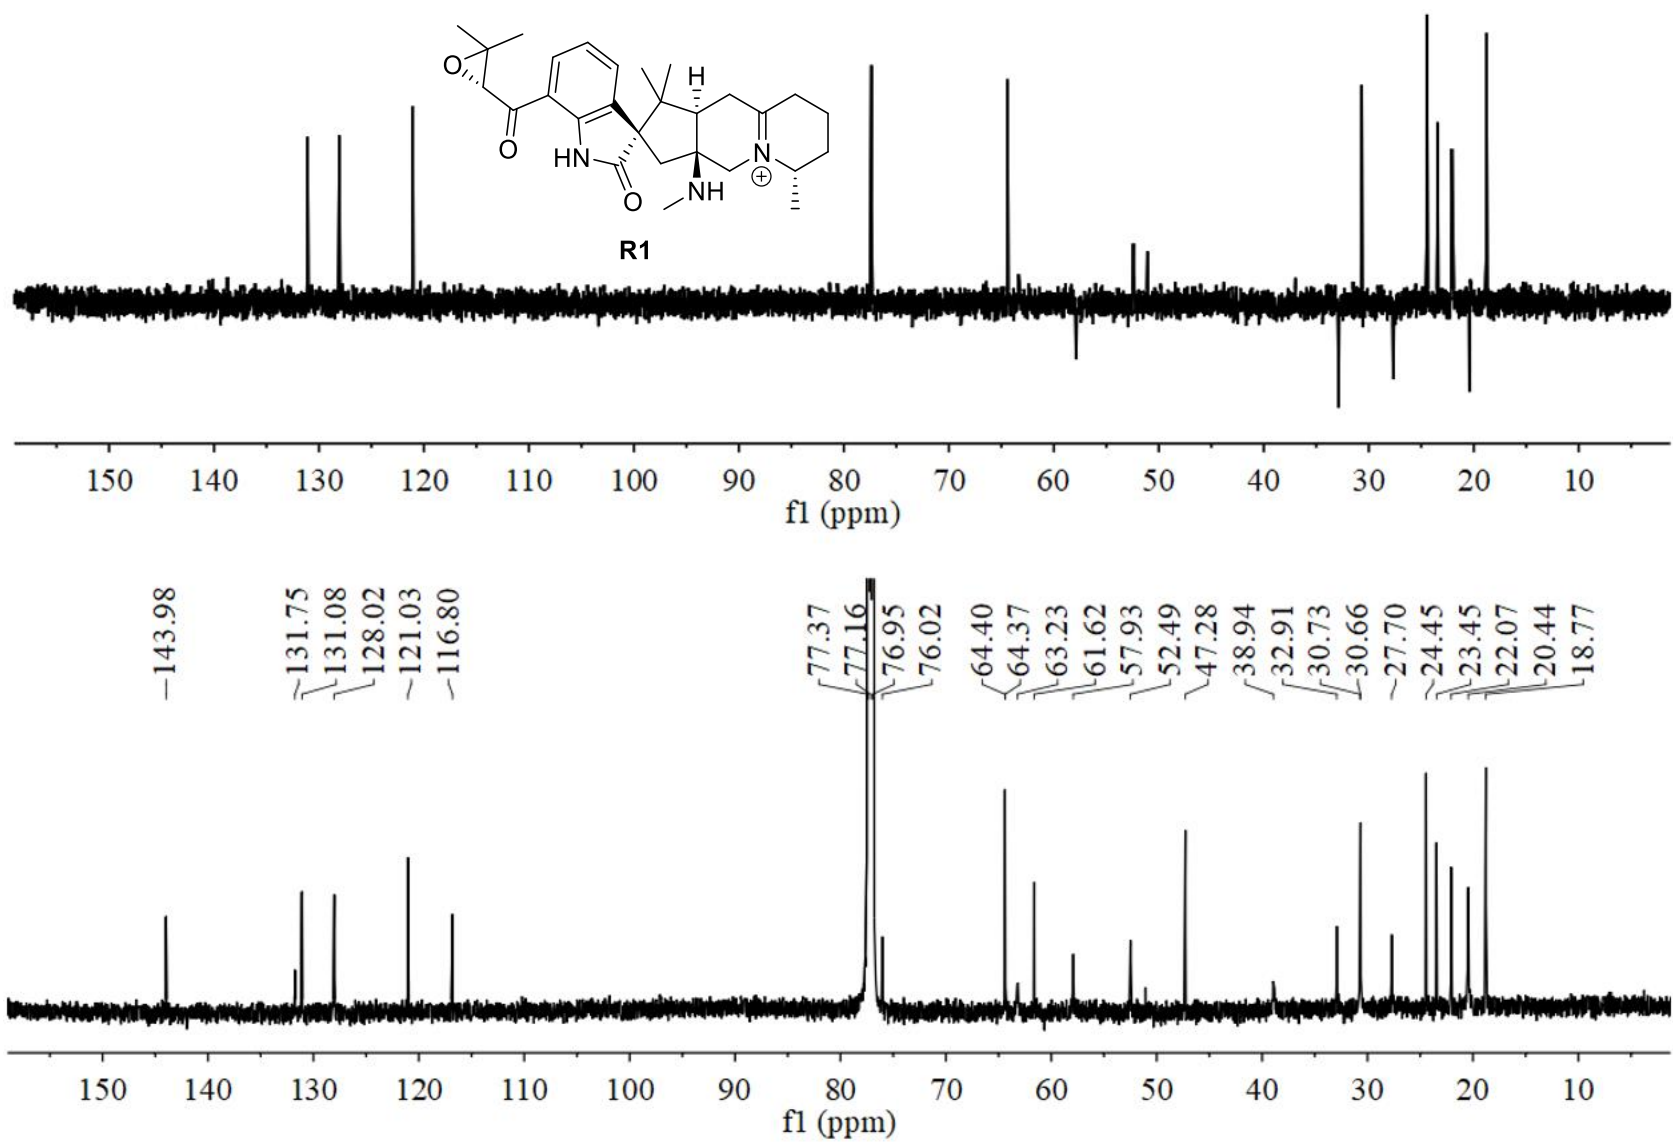

Supplementary Fig. 17-3 | DEPT135 and  $^{13}\text{C}$  NMR spectra of R1 in  $\text{CDCl}_3$ .

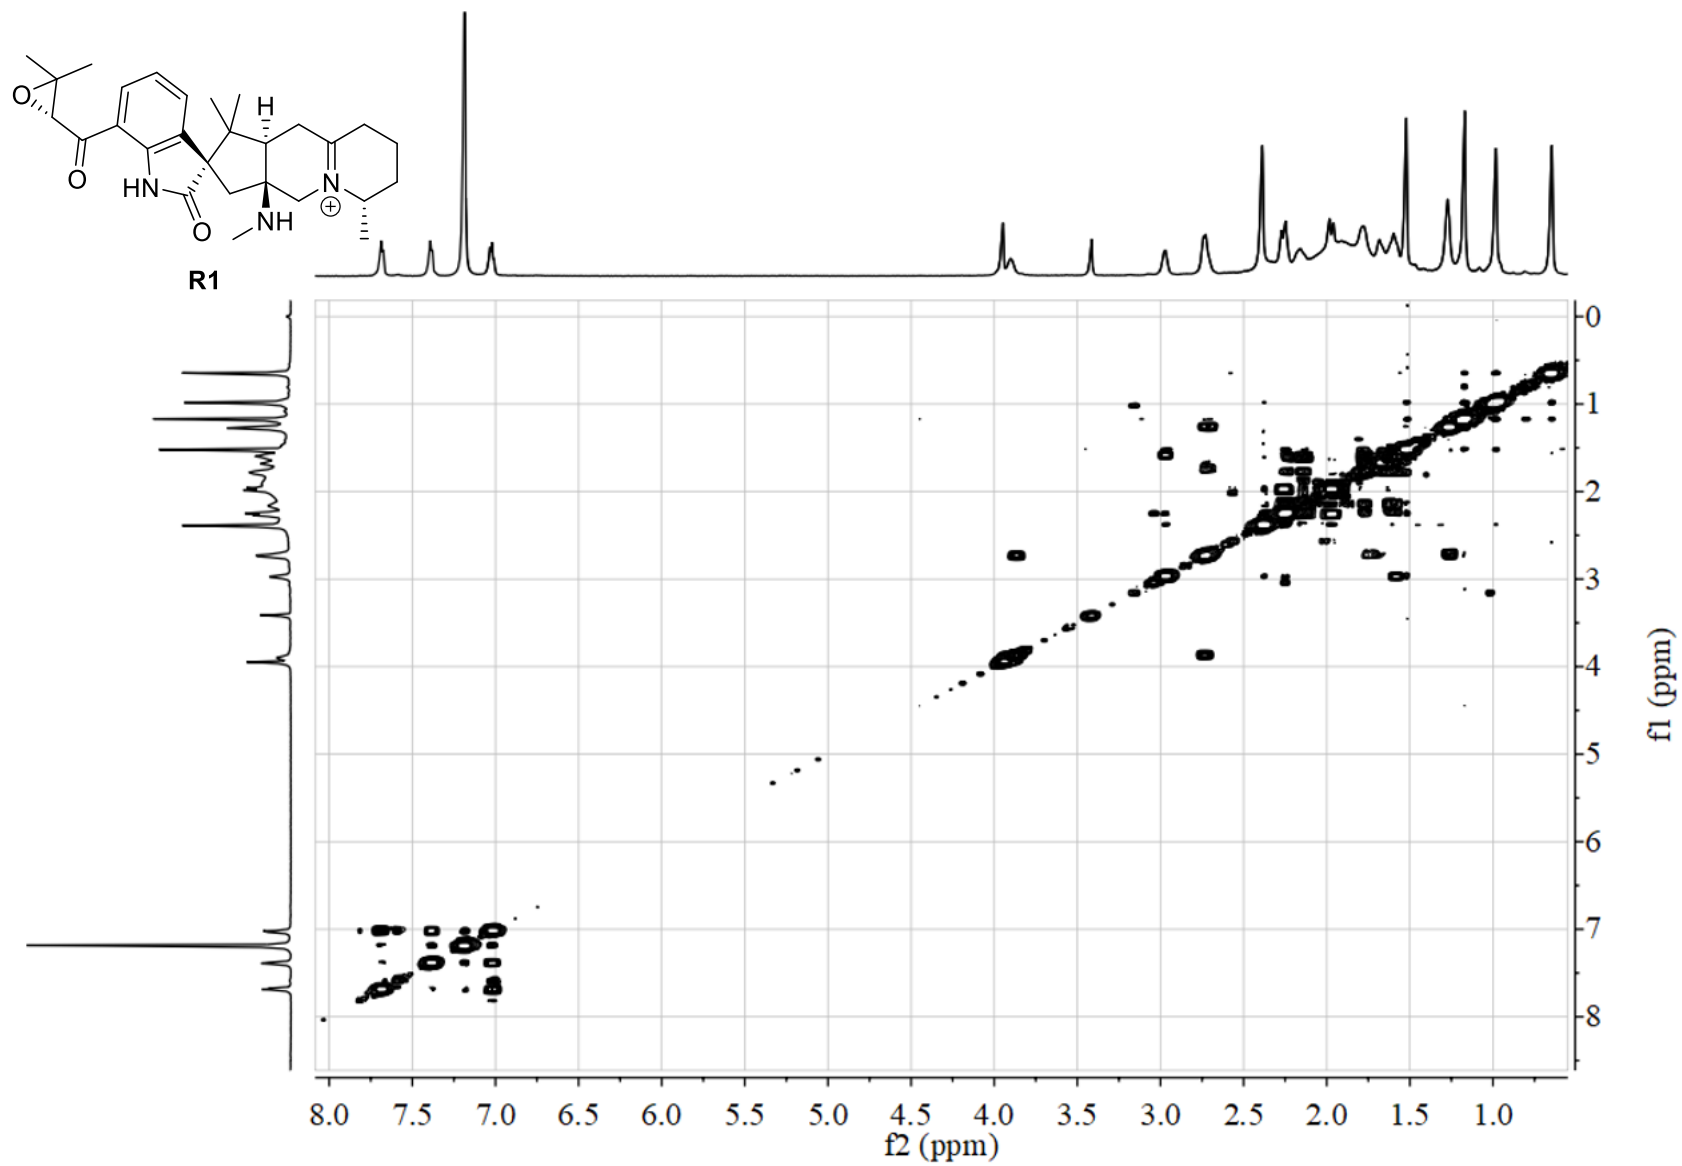

Supplementary Fig. 17-4 |  $^1\text{H}$ - $^1\text{H}$  COSY NMR spectrum of R1 in  $\text{CDCl}_3$ .

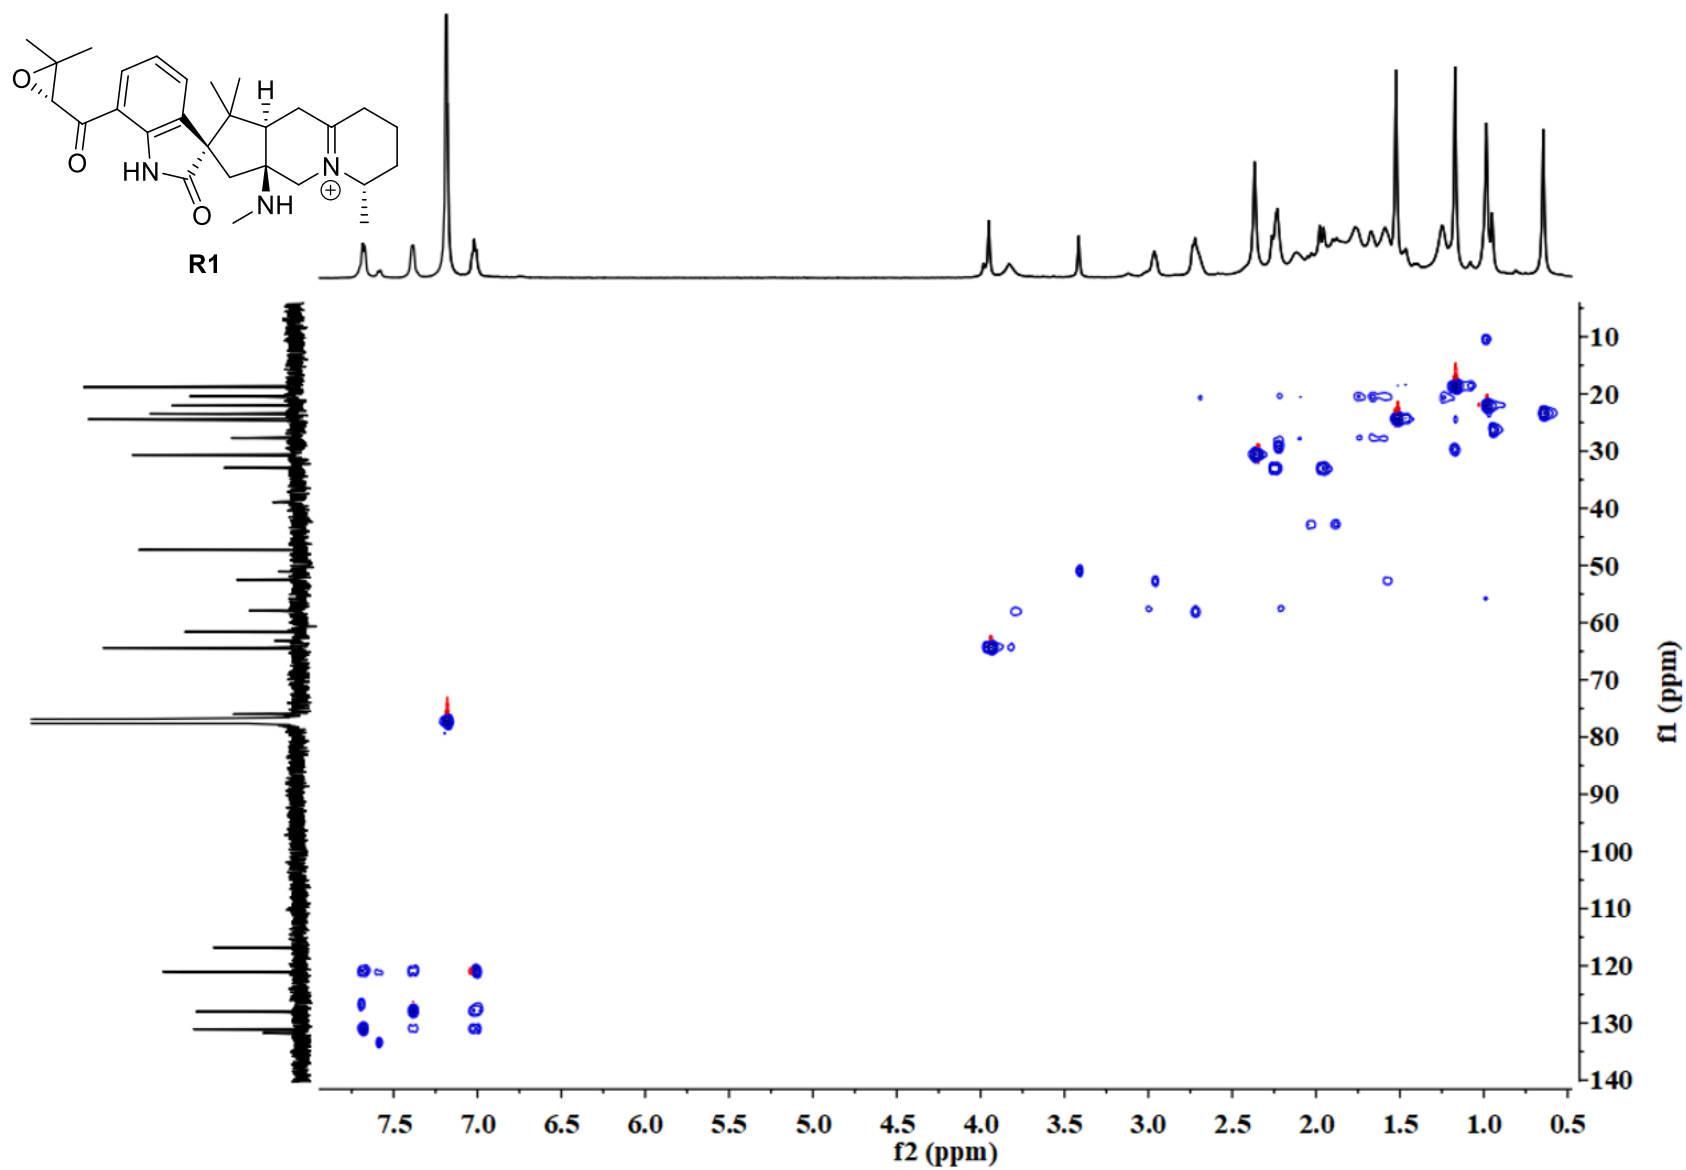

Supplementary Fig. 17-5 | HSQC-TOCSY NMR spectrum of R1 in CDCl<sub>3</sub>.

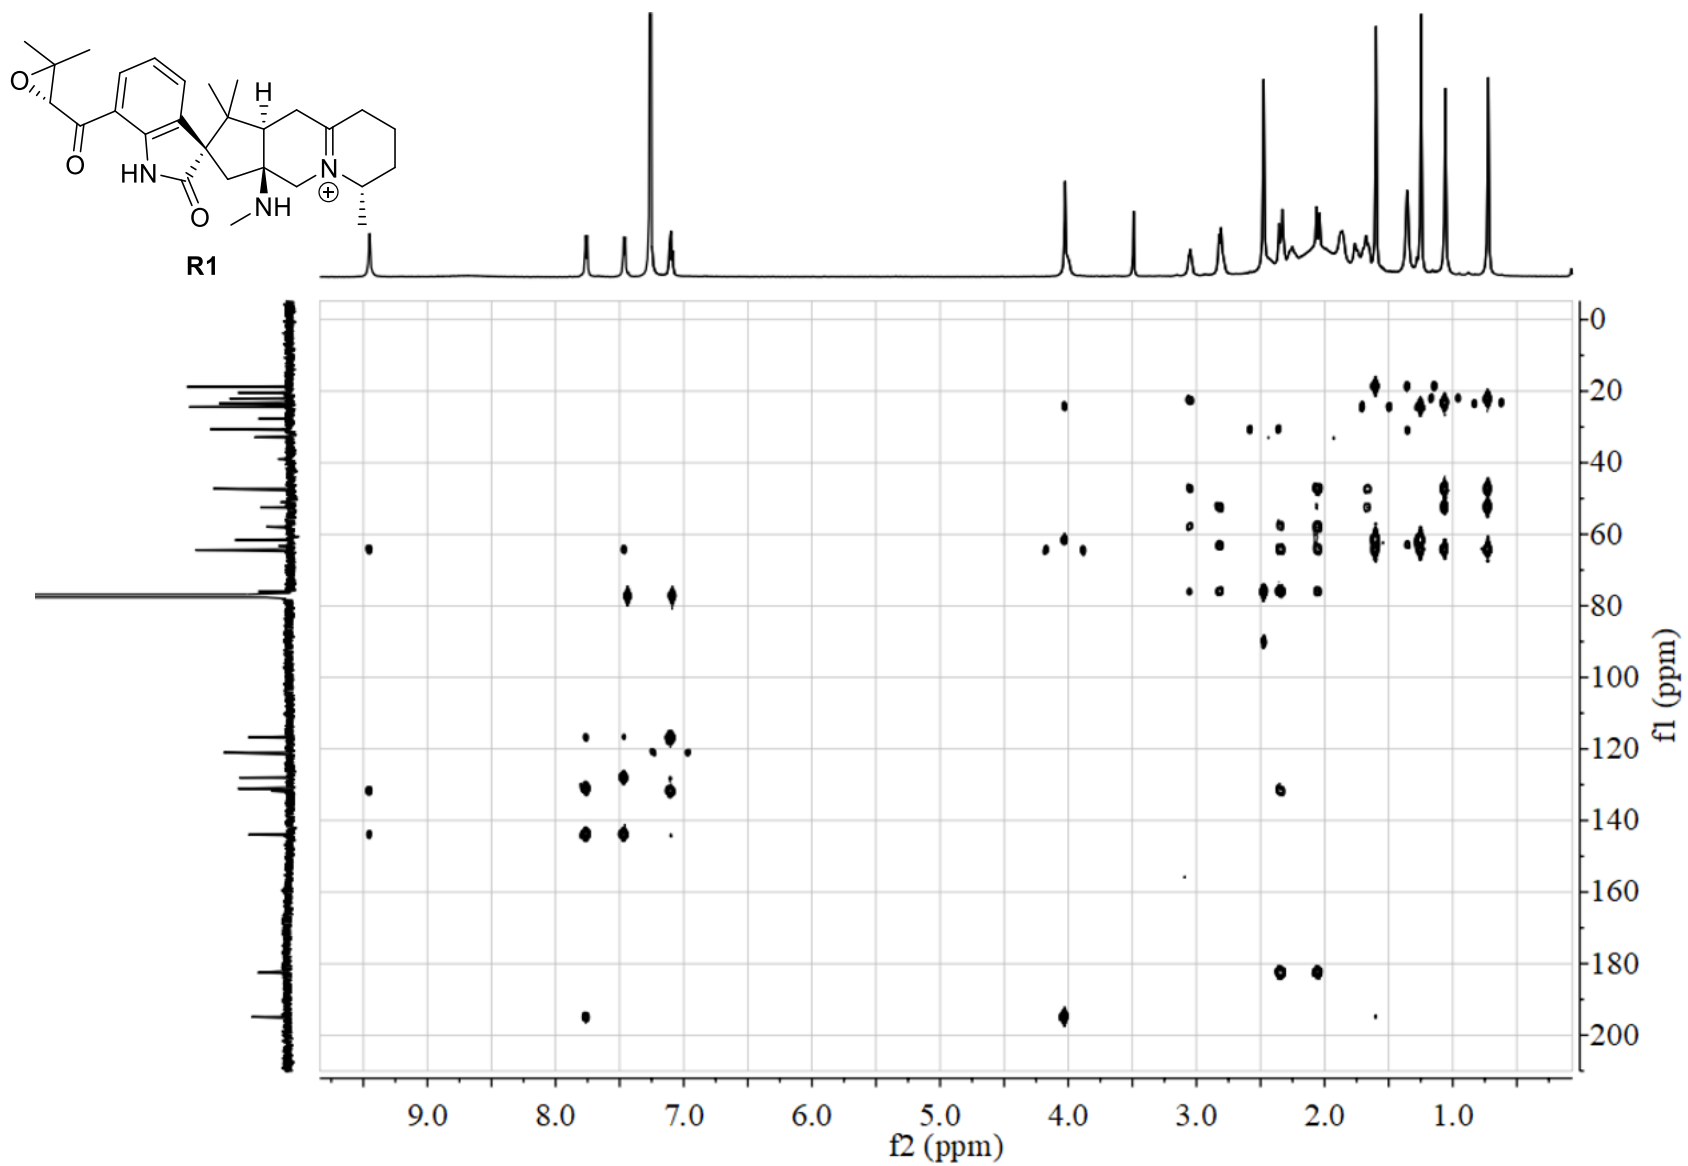

Supplementary Fig. 17-6 | HMBC NMR spectrum of R1 in CDCl<sub>3</sub>.

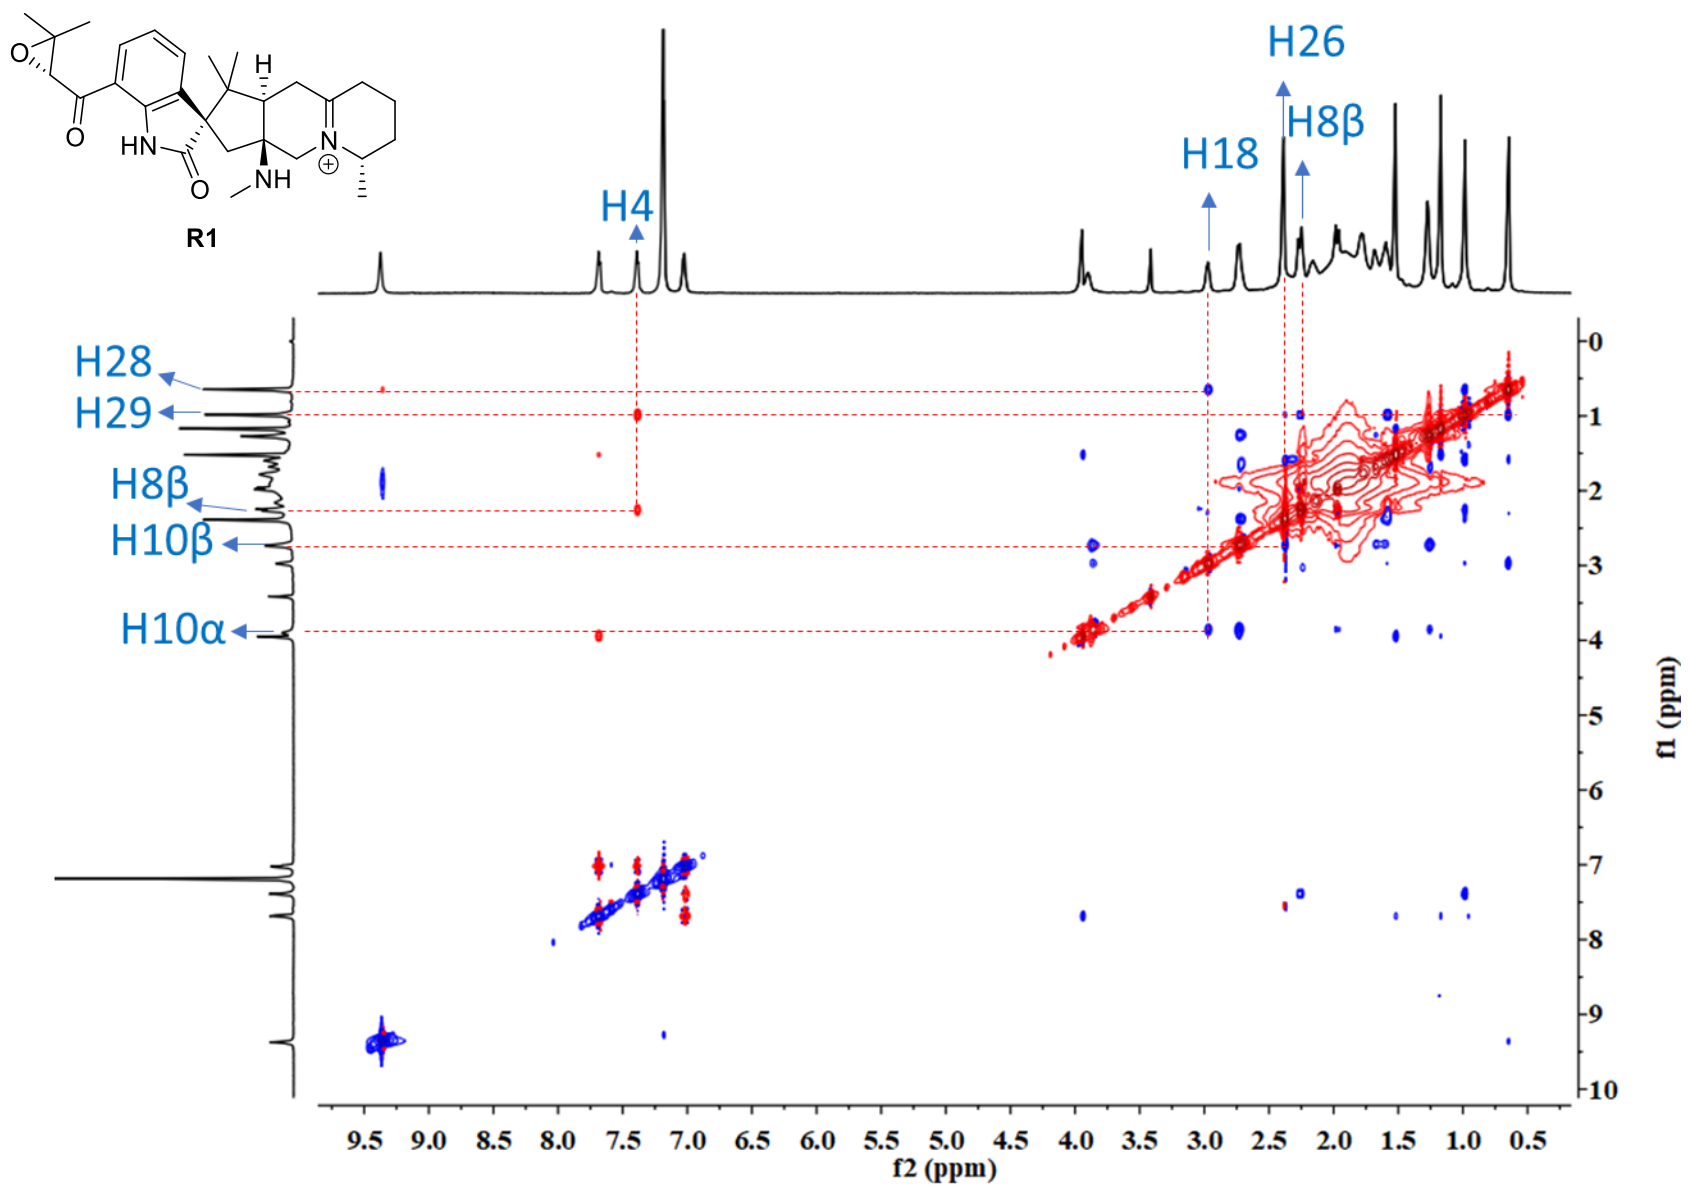

Supplementary Fig. 17-7 | NOESY NMR spectrum of R1 in CDCl<sub>3</sub>.



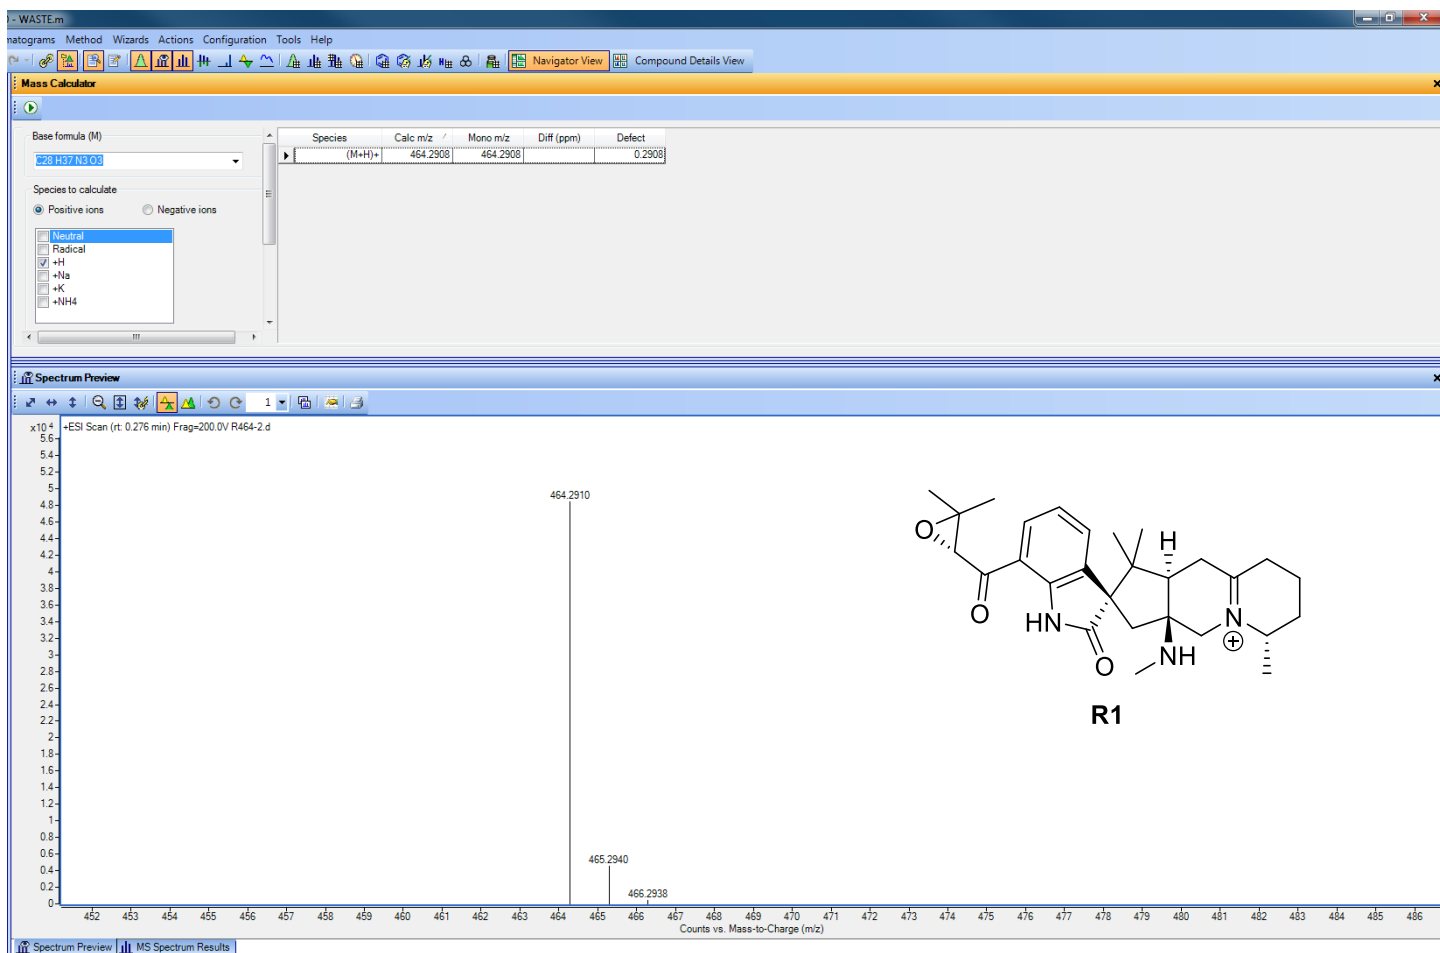

Supplementary Fig. 17-8 | HRMS spectrum of R1 in CDCl<sub>3</sub>.

## Energies and Molecular Coordinates of Calculated Structures.

| <b>Structure</b>                               | <b>Single-Point Energy</b><br>(Hartree)<br><br>M06-2X/<br>6-311++G(2d,2p)<br><br>CPCM water solvent | <b>Enthalpy</b><br><b>Correction</b><br>(Hartree)<br><br>M06-2X/6-31+G(d)<br><br>CPCM water solvent | <b>Gibbs Free Energy</b><br><b>Correction</b><br>(Hartree)<br><br>M06-2X/6-31+G(d)<br><br>CPCM water solvent |
|------------------------------------------------|-----------------------------------------------------------------------------------------------------|-----------------------------------------------------------------------------------------------------|--------------------------------------------------------------------------------------------------------------|
| Substrate <b>3</b>                             | -1133.27763795                                                                                      | 0.512919                                                                                            | 0.432077                                                                                                     |
| Substrate <b>3-taut</b>                        | -1133.24220759                                                                                      | 0.512060                                                                                            | 0.431172                                                                                                     |
| Substrate <b>3-ox</b>                          | -1132.51988010                                                                                      | 0.503054                                                                                            | 0.423583                                                                                                     |
| <b>TS-taut</b> <sub><i>α-anti</i></sub>        | -1133.20758299                                                                                      | 0.510622                                                                                            | 0.436393                                                                                                     |
| <b>TS-ox</b> <sub><i>α-anti</i></sub>          | -1132.48695913                                                                                      | 0.502384                                                                                            | 0.429517                                                                                                     |
| Product <b>2-taut</b>                          | -1133.30637638                                                                                      | 0.515543                                                                                            | 0.443782                                                                                                     |
| Product <b>2-ox</b>                            | -1132.54357524                                                                                      | 0.505760                                                                                            | 0.433204                                                                                                     |
| Product <b>2</b>                               | -1133.32726952                                                                                      | 0.515808                                                                                            | 0.443338                                                                                                     |
| Substrate <b>3-ox</b> <sub><i>α-syn</i></sub>  | -1132.51871022                                                                                      | 0.503050                                                                                            | 0.423882                                                                                                     |
| Substrate <b>3-ox</b> <sub><i>β-syn</i></sub>  | -1132.51660234                                                                                      | 0.503183                                                                                            | 0.424415                                                                                                     |
| Substrate <b>3-ox</b> <sub><i>β-anti</i></sub> | -1132.51549387                                                                                      | 0.503060                                                                                            | 0.425197                                                                                                     |
| <b>TS-ox</b> <sub><i>α-syn</i></sub>           | -1132.48734470                                                                                      | 0.502322                                                                                            | 0.430120                                                                                                     |
| <b>TS-ox</b> <sub><i>β-syn</i></sub>           | -1132.49035735                                                                                      | 0.502212                                                                                            | 0.429479                                                                                                     |
| <b>TS-ox</b> <sub><i>β-anti</i></sub>          | -1132.48763403                                                                                      | 0.502498                                                                                            | 0.429897                                                                                                     |
| NADP <sup>+</sup> Model                        | -456.702066786                                                                                      | 0.169217                                                                                            | 0.124487                                                                                                     |
| NADPH Model                                    | -457.446769424                                                                                      | 0.178720                                                                                            | 0.131205                                                                                                     |
| Substrate <b>4</b>                             | -1132.06562844                                                                                      | 0.488953                                                                                            | 0.408388                                                                                                     |
| Substrate <b>9</b>                             | -1053.44990317                                                                                      | 0.428902                                                                                            | 0.353768                                                                                                     |
| Substrate <b>9-red</b>                         | -1054.65441754                                                                                      | 0.453013                                                                                            | 0.376677                                                                                                     |

### Substrate 3

0 1

|   |           |           |           |
|---|-----------|-----------|-----------|
| N | -1.707056 | -1.291350 | -1.810658 |
| C | -2.999269 | -1.405467 | -1.416401 |
| O | -3.839078 | -2.009447 | -2.077905 |
| C | -3.318343 | -0.771696 | -0.058276 |
| N | 3.297103  | 0.430707  | 0.880042  |
| C | 3.580603  | -2.855172 | -1.129870 |
| N | -2.525273 | 0.454711  | 0.113926  |
| C | 3.099662  | -3.046384 | 0.098080  |
| C | -0.727432 | -0.631251 | -1.038922 |
| C | 0.704299  | -0.943344 | -1.387339 |
| C | 1.705779  | -0.171221 | -0.582238 |
| C | 2.002182  | 1.223259  | -0.769252 |
| C | 1.505957  | 2.213515  | -1.636554 |
| C | 2.020547  | 3.498543  | -1.549285 |
| C | 3.023993  | 3.819523  | -0.607850 |
| C | 3.529536  | 2.863045  | 0.261120  |
| C | 3.005978  | 1.567551  | 0.166459  |
| C | 2.513840  | -0.620209 | 0.441014  |
| C | 2.610946  | -1.991868 | 1.077538  |
| C | 3.596712  | -1.990267 | 2.262194  |
| C | 1.226192  | -2.406332 | 1.619648  |
| C | -1.152630 | 0.218713  | -0.095708 |
| H | 3.975810  | 0.377227  | 1.626435  |
| H | 3.630500  | -1.866177 | -1.580001 |
| H | 3.933645  | -3.692115 | -1.725305 |
| H | 3.067252  | -4.060260 | 0.502322  |
| H | 0.855675  | -0.720489 | -2.455976 |
| H | 0.877879  | -2.021615 | -1.285739 |
| H | 0.726951  | 1.974344  | -2.357103 |
| H | 1.647177  | 4.274800  | -2.210944 |
| H | 3.405786  | 4.835261  | -0.562293 |
| H | 4.299621  | 3.108185  | 0.986868  |
| H | 3.271723  | -1.296572 | 3.046063  |
| H | 3.637334  | -2.991208 | 2.702533  |
| H | 4.611855  | -1.729524 | 1.944470  |
| H | 0.886956  | -1.685716 | 2.371538  |
| H | 0.472546  | -2.450595 | 0.828958  |
| H | 1.290735  | -3.393732 | 2.090387  |
| C | -4.815556 | -0.514956 | 0.057646  |
| H | -5.132730 | 0.111887  | -0.785724 |
| C | -2.823058 | 1.212077  | 1.348728  |
| H | -2.505806 | 0.607499  | 2.220363  |
| C | -5.136771 | 0.183290  | 1.372528  |
| H | -6.208357 | 0.398426  | 1.437630  |
| H | -4.887283 | -0.477330 | 2.214478  |
| C | -4.324833 | 1.468589  | 1.469711  |
| H | -4.627446 | 2.158454  | 0.669065  |
| H | -4.508513 | 1.975005  | 2.423610  |
| H | -5.339672 | -1.470179 | -0.030184 |
| C | -2.079865 | 2.547254  | 1.362549  |
| H | -0.995863 | 2.445112  | 1.451799  |
| H | -2.300889 | 3.104066  | 0.444981  |
| H | -2.422105 | 3.139485  | 2.216701  |
| H | -3.019373 | -1.516981 | 0.710864  |
| H | -1.440270 | -1.774992 | -2.662344 |
| H | -0.434737 | 0.751667  | 0.513516  |

## Substrate 3-taut

0 1

|   |           |           |           |
|---|-----------|-----------|-----------|
| C | 0.459260  | -0.629075 | -0.864877 |
| C | -0.750694 | -0.079799 | -1.582561 |
| C | -1.945099 | 0.172469  | -0.709773 |
| C | -2.137760 | 1.183512  | 0.210396  |
| C | -1.225570 | 2.311206  | 0.663786  |
| C | -0.434324 | 2.826272  | -0.522193 |
| C | 0.893086  | 2.879288  | -0.628438 |
| C | 2.722359  | -1.206661 | 0.578036  |
| C | 1.509850  | -1.760620 | 0.809606  |
| N | 0.339251  | -1.327199 | 0.203816  |
| C | -3.983600 | -0.117287 | 0.313656  |
| C | -5.227325 | -0.685564 | 0.615272  |
| C | -5.584497 | -1.838983 | -0.068701 |
| C | -4.725861 | -2.414484 | -1.031120 |
| C | -3.497431 | -1.842564 | -1.328103 |
| C | -3.110094 | -0.670033 | -0.653713 |
| N | -3.365938 | 0.998406  | 0.820605  |
| C | 1.823217  | -0.440748 | -1.480362 |
| N | 2.810111  | -0.219933 | -0.429447 |
| C | 4.135323  | 0.097518  | -0.995887 |
| C | 5.242627  | 0.009480  | 0.051612  |
| C | 5.219672  | -1.326852 | 0.778389  |
| C | 3.883318  | -1.455126 | 1.501070  |
| O | 1.330104  | -2.661936 | 1.835327  |
| C | 4.140817  | 1.487913  | -1.629471 |
| C | -2.057022 | 3.501149  | 1.188558  |
| C | -0.318756 | 1.805389  | 1.797661  |
| H | -1.048909 | 3.209075  | -1.339943 |
| H | -5.883678 | -0.241411 | 1.358131  |
| H | -6.540865 | -2.308908 | 0.141348  |
| H | -5.035663 | -3.320291 | -1.544242 |
| H | -2.844911 | -2.297529 | -2.069596 |
| H | -3.772420 | 1.617012  | 1.508095  |
| H | 4.355069  | -0.654033 | -1.780097 |
| H | -0.450150 | 0.824807  | -2.117451 |
| H | -1.022066 | -0.806345 | -2.363694 |
| H | 1.556035  | 2.493732  | 0.141541  |
| H | 1.363324  | 3.298614  | -1.514310 |
| H | 2.085045  | -1.350544 | -2.068030 |
| H | 1.809670  | 0.409443  | -2.162750 |
| H | 6.198802  | 0.169010  | -0.458159 |
| H | 5.119119  | 0.827149  | 0.776502  |
| H | 6.044994  | -1.398215 | 1.493863  |
| H | 5.337785  | -2.145052 | 0.055429  |
| H | 3.852343  | -0.716640 | 2.317075  |
| H | 3.761379  | -2.438595 | 1.961002  |
| H | 3.428909  | 1.592698  | -2.451691 |
| H | 5.137291  | 1.695994  | -2.031941 |
| H | 3.909597  | 2.243704  | -0.871407 |
| H | -2.780965 | 3.845431  | 0.442463  |
| H | -1.386314 | 4.332054  | 1.426644  |
| H | -2.593341 | 3.245177  | 2.109136  |
| H | -0.932856 | 1.425470  | 2.620885  |
| H | 0.301497  | 2.622942  | 2.182051  |
| H | 0.334169  | 0.996615  | 1.456567  |
| H | 0.383324  | -2.873196 | 1.858087  |

### Substrate 3-ox

I 1

|   |           |           |           |
|---|-----------|-----------|-----------|
| C | 0.529772  | -0.354241 | -0.932042 |
| C | -0.720620 | 0.066585  | -1.658313 |
| C | -1.915192 | 0.183780  | -0.753813 |
| C | -2.224274 | 1.182511  | 0.151307  |
| C | -1.472454 | 2.441897  | 0.543732  |
| C | -0.825718 | 3.046922  | -0.686888 |
| C | 0.456524  | 3.386501  | -0.816306 |
| C | 2.784237  | -1.242056 | 0.427477  |
| C | 1.457417  | -1.798626 | 0.781275  |
| N | 0.409535  | -1.277339 | 0.063629  |
| C | -3.848359 | -0.376646 | 0.348926  |
| C | -4.982191 | -1.111550 | 0.715315  |
| C | -5.186105 | -2.325456 | 0.076570  |
| C | -4.286886 | -2.797822 | -0.904638 |
| C | -3.168860 | -2.062401 | -1.267030 |
| C | -2.937656 | -0.825033 | -0.636048 |
| N | -3.387626 | 0.835152  | 0.801806  |
| C | 1.767577  | 0.113531  | -1.229887 |
| N | 2.871842  | -0.352578 | -0.533567 |
| C | 4.190420  | 0.262471  | -0.937380 |
| C | 5.342061  | -0.647958 | -0.533057 |
| C | 5.254444  | -1.021566 | 0.941851  |
| C | 3.950411  | -1.768849 | 1.195083  |
| O | 1.316125  | -2.645738 | 1.649149  |
| C | 4.260238  | 1.669808  | -0.349015 |
| C | -2.446701 | 3.501183  | 1.101717  |
| C | -0.447188 | 2.089103  | 1.634000  |
| H | -1.515506 | 3.245392  | -1.509579 |
| H | -5.669844 | -0.745208 | 1.471820  |
| H | -6.052993 | -2.925426 | 0.336612  |
| H | -4.477382 | -3.754492 | -1.381737 |
| H | -2.485733 | -2.440150 | -2.024155 |
| H | -3.854097 | 1.402385  | 1.496177  |
| H | 4.134737  | 0.318743  | -2.027010 |
| H | -0.504465 | 0.993761  | -2.192264 |
| H | -0.924535 | -0.695730 | -2.421229 |
| H | 1.183831  | 3.215880  | -0.026774 |
| H | 0.820920  | 3.853830  | -1.726860 |
| H | 5.321426  | -1.553470 | -1.150408 |
| H | 6.273507  | -0.121068 | -0.756823 |
| H | 5.304708  | -0.126415 | 1.569191  |
| H | 6.095546  | -1.657746 | 1.225629  |
| H | 3.666522  | -1.771000 | 2.252674  |
| H | 4.040011  | -2.828825 | 0.916043  |
| H | 3.450152  | 2.299414  | -0.725681 |
| H | 5.208714  | 2.123986  | -0.646634 |
| H | 4.206089  | 1.650799  | 0.742524  |
| H | -3.246104 | 3.726484  | 0.388452  |
| H | -1.894862 | 4.423513  | 1.303493  |
| H | -2.895853 | 3.178717  | 2.047569  |
| H | -0.951279 | 1.614211  | 2.481382  |
| H | 0.053100  | 2.993286  | 1.996621  |
| H | 0.317571  | 1.399904  | 1.260170  |
| H | 1.950012  | 0.842792  | -2.006360 |
| H | -0.524825 | -1.606832 | 0.313884  |

## TS-taut<sub>a-anti</sub>

0 1

|   |           |           |           |
|---|-----------|-----------|-----------|
| C | 0.428085  | -0.781343 | -0.034476 |
| C | -0.880332 | -1.446132 | -0.390417 |
| C | -2.070004 | -0.548121 | -0.258990 |
| C | -2.102003 | 0.814559  | -0.426143 |
| C | -1.008545 | 1.807348  | -0.753842 |
| C | 0.272615  | 1.109271  | -1.214764 |
| C | 1.517475  | 1.666667  | -1.010278 |
| C | 2.769787  | 0.373842  | 0.462571  |
| C | 1.753959  | 0.324433  | 1.402995  |
| N | 0.568505  | -0.259457 | 1.172656  |
| C | -4.219360 | 0.192045  | 0.063938  |
| C | -5.591154 | 0.145308  | 0.337831  |
| C | -6.147980 | -1.098871 | 0.602827  |
| C | -5.360883 | -2.270438 | 0.595930  |
| C | -4.001044 | -2.217050 | 0.322547  |
| C | -3.409946 | -0.970465 | 0.051987  |
| N | -3.401684 | 1.255193  | -0.230432 |
| C | 1.630910  | -1.390039 | -0.733500 |
| N | 2.886760  | -0.670550 | -0.505038 |
| C | 4.025899  | -1.583303 | -0.271610 |
| C | 5.318414  | -0.797683 | -0.045785 |
| C | 5.177230  | 0.267310  | 1.037111  |
| C | 4.010063  | 1.189976  | 0.670976  |
| O | 1.837040  | 1.111276  | 2.520426  |
| C | 4.196534  | -2.523068 | -1.462410 |
| C | -1.475695 | 2.685360  | -1.940423 |
| C | -0.775986 | 2.718069  | 0.465265  |
| H | 0.142388  | 0.473730  | -2.092818 |
| H | -6.195784 | 1.047711  | 0.343003  |
| H | -7.209803 | -1.171503 | 0.819457  |
| H | -5.830493 | -3.226710 | 0.807377  |
| H | -3.404175 | -3.125969 | 0.316964  |
| H | -3.708616 | 2.216371  | -0.285990 |
| H | 3.816077  | -2.185223 | 0.636014  |
| H | -0.806932 | -1.847133 | -1.410063 |
| H | -1.000816 | -2.319579 | 0.267002  |
| H | 1.646096  | 2.567414  | -0.416459 |
| H | 2.338067  | 1.409087  | -1.669779 |
| H | 1.702564  | -2.412777 | -0.315173 |
| H | 1.431925  | -1.501128 | -1.806564 |
| H | 6.112004  | -1.509838 | 0.207002  |
| H | 5.601799  | -0.317098 | -0.993076 |
| H | 6.104394  | 0.842016  | 1.135925  |
| H | 4.978596  | -0.206674 | 2.007600  |
| H | 4.251464  | 1.708455  | -0.267699 |
| H | 3.834636  | 1.946511  | 1.439215  |
| H | 3.333053  | -3.176205 | -1.613750 |
| H | 5.071833  | -3.160837 | -1.304091 |
| H | 4.352510  | -1.938739 | -2.376415 |
| H | -1.705287 | 2.069554  | -2.816273 |
| H | -0.681806 | 3.389316  | -2.208086 |
| H | -2.368353 | 3.268486  | -1.687528 |
| H | -1.724975 | 3.138156  | 0.813320  |
| H | -0.121554 | 3.557149  | 0.210682  |
| H | -0.328601 | 2.157423  | 1.290034  |
| H | 0.950162  | 1.135476  | 2.918431  |

**TS-oxa-anti**

I 1

|   |           |           |           |
|---|-----------|-----------|-----------|
| C | 0.357901  | -1.105925 | 0.271298  |
| C | -0.993548 | -1.642493 | -0.075817 |
| C | -2.048015 | -0.580765 | -0.156731 |
| C | -1.911260 | 0.768164  | -0.391316 |
| C | -0.710998 | 1.673711  | -0.601367 |
| C | 0.565103  | 0.940412  | -1.007963 |
| C | 1.824753  | 1.386019  | -0.598861 |
| C | 2.719403  | 0.091810  | 0.716184  |
| C | 1.671619  | 0.204073  | 1.778020  |
| N | 0.520733  | -0.465752 | 1.482620  |
| C | -4.127821 | 0.382472  | -0.149443 |
| C | -5.520740 | 0.488864  | -0.057072 |
| C | -6.231590 | -0.677229 | 0.187575  |
| C | -5.577755 | -1.919655 | 0.336211  |
| C | -4.197345 | -2.017264 | 0.242436  |
| C | -3.453607 | -0.849914 | -0.002201 |
| N | -3.172034 | 1.339930  | -0.383962 |
| C | 1.495842  | -1.557268 | -0.368928 |
| N | 2.695295  | -1.051620 | -0.044956 |
| C | 3.885339  | -1.556938 | -0.816058 |
| C | 5.176797  | -1.118722 | -0.134128 |
| C | 5.171627  | 0.382369  | 0.137451  |
| C | 4.041519  | 0.703969  | 1.105662  |
| O | 1.820013  | 0.885395  | 2.781651  |
| C | 3.812323  | -1.130013 | -2.282918 |
| C | -0.994185 | 2.588797  | -1.826879 |
| C | -0.535078 | 2.578760  | 0.635492  |
| H | 0.488266  | 0.395744  | -1.946857 |
| H | -6.022469 | 1.445041  | -0.172521 |
| H | -7.313867 | -0.633508 | 0.265498  |
| H | -6.168707 | -2.810780 | 0.525358  |
| H | -3.703832 | -2.979450 | 0.354172  |
| H | -3.370821 | 2.322443  | -0.511439 |
| H | 3.792845  | -2.644374 | -0.756842 |
| H | -0.912435 | -2.196949 | -1.017250 |
| H | -1.275358 | -2.374986 | 0.693459  |
| H | 1.885748  | 2.254003  | 0.052030  |
| H | 2.647575  | 1.290620  | -1.300500 |
| H | 5.295510  | -1.661806 | 0.810722  |
| H | 6.008767  | -1.405253 | -0.783500 |
| H | 5.062961  | 0.950409  | -0.793151 |
| H | 6.120167  | 0.691087  | 0.583752  |
| H | 3.896595  | 1.780297  | 1.230842  |
| H | 4.282535  | 0.313834  | 2.103335  |
| H | 2.854740  | -1.389687 | -2.741612 |
| H | 4.597868  | -1.660127 | -2.827873 |
| H | 3.980178  | -0.058447 | -2.413096 |
| H | -1.240189 | 1.997491  | -2.713472 |
| H | -0.114130 | 3.201202  | -2.041904 |
| H | -1.825076 | 3.270361  | -1.620435 |
| H | -1.498589 | 3.018948  | 0.906207  |
| H | 0.149201  | 3.404887  | 0.421442  |
| H | -0.163746 | 2.037933  | 1.510031  |
| H | 1.442993  | -2.279792 | -1.174622 |
| H | -0.286493 | -0.319616 | 2.085234  |

## Product 2-taut

0 1

|   |           |           |           |
|---|-----------|-----------|-----------|
| C | -0.374464 | 0.577250  | -0.155862 |
| C | 0.920966  | 1.395286  | -0.191594 |
| C | 2.133656  | 0.520714  | -0.137266 |
| C | 2.107702  | -0.836254 | -0.322207 |
| C | 0.892276  | -1.697449 | -0.527430 |
| C | -0.266551 | -0.747003 | -0.960642 |
| C | -1.663192 | -1.403192 | -0.935223 |
| C | -2.626848 | -0.599823 | -0.031644 |
| C | -1.871020 | -0.343117 | 1.260418  |
| N | -0.752409 | 0.265300  | 1.229896  |
| C | 4.270316  | -0.305226 | 0.006537  |
| C | 5.660171  | -0.312460 | 0.168743  |
| C | 6.284612  | 0.906289  | 0.401847  |
| C | 5.546391  | 2.106825  | 0.471200  |
| C | 4.167596  | 2.108737  | 0.307604  |
| C | 3.508030  | 0.890320  | 0.071922  |
| N | 3.393311  | -1.338295 | -0.232566 |
| C | -1.513482 | 1.416943  | -0.769405 |
| N | -2.808817 | 0.715065  | -0.701517 |
| C | -3.870590 | 1.568741  | -0.138571 |
| C | -5.187696 | 0.800860  | -0.039591 |
| C | -5.039687 | -0.486143 | 0.761669  |
| C | -3.946504 | -1.344937 | 0.133220  |
| O | -2.411123 | -0.779470 | 2.415452  |
| C | -4.069053 | 2.799402  | -1.022430 |
| C | 1.122628  | -2.702775 | -1.669828 |
| C | 0.649020  | -2.489200 | 0.776390  |
| H | -0.030577 | -0.447969 | -1.991338 |
| H | 6.228282  | -1.236872 | 0.115043  |
| H | 7.362399  | 0.935076  | 0.533393  |
| H | 6.068603  | 3.041329  | 0.654996  |
| H | 3.605482  | 3.037982  | 0.361897  |
| H | 3.655255  | -2.309668 | -0.329951 |
| H | -3.582489 | 1.904500  | 0.879277  |
| H | 0.937974  | 2.001178  | -1.109020 |
| H | 0.903962  | 2.102427  | 0.647329  |
| H | -1.626866 | -2.436909 | -0.578435 |
| H | -2.109775 | -1.420747 | -1.934153 |
| H | -1.554156 | 2.351836  | -0.192051 |
| H | -1.267776 | 1.674498  | -1.807228 |
| H | -5.939297 | 1.457954  | 0.412747  |
| H | -5.529167 | 0.566144  | -1.058076 |
| H | -5.984594 | -1.039922 | 0.778708  |
| H | -4.781755 | -0.250349 | 1.800717  |
| H | -4.268934 | -1.662219 | -0.867421 |
| H | -3.764507 | -2.252191 | 0.719435  |
| H | -3.179381 | 3.431597  | -1.080036 |
| H | -4.886867 | 3.409526  | -0.625861 |
| H | -4.332742 | 2.484054  | -2.038465 |
| H | 1.410088  | -2.191038 | -2.594284 |
| H | 0.206693  | -3.273051 | -1.862066 |
| H | 1.906420  | -3.425236 | -1.417385 |
| H | 1.509050  | -3.141431 | 0.965662  |
| H | -0.232714 | -3.134398 | 0.706141  |
| H | 0.529815  | -1.823770 | 1.633242  |
| H | -1.793686 | -0.553793 | 3.135725  |



## Product 2-ox

1 1

|   |           |           |           |
|---|-----------|-----------|-----------|
| C | 0.349574  | -0.690078 | 0.206323  |
| C | -0.959165 | -1.471386 | 0.121065  |
| C | -2.117943 | -0.543788 | -0.045596 |
| C | -2.001445 | 0.767573  | -0.422966 |
| C | -0.736393 | 1.550457  | -0.649951 |
| C | 0.435867  | 0.525136  | -0.795011 |
| C | 1.838929  | 1.156615  | -0.633036 |
| C | 2.659290  | 0.413548  | 0.461708  |
| C | 1.791658  | 0.446939  | 1.747732  |
| N | 0.618287  | -0.185526 | 1.547948  |
| C | -4.207147 | 0.373311  | -0.220199 |
| C | -5.603538 | 0.460977  | -0.192026 |
| C | -6.308103 | -0.683980 | 0.153931  |
| C | -5.643930 | -1.889950 | 0.464397  |
| C | -4.259209 | -1.972199 | 0.434089  |
| C | -3.520677 | -0.827533 | 0.088949  |
| N | -3.259510 | 1.324602  | -0.525177 |
| C | 1.533426  | -1.549557 | -0.143785 |
| N | 2.688781  | -1.014373 | -0.013171 |
| C | 3.916942  | -1.723372 | -0.529475 |
| C | 5.185722  | -1.057167 | -0.008854 |
| C | 5.131083  | 0.457733  | -0.179627 |
| C | 4.038594  | 1.008711  | 0.728655  |
| O | 2.129390  | 1.023053  | 2.768264  |
| C | 3.847950  | -1.754467 | -2.057067 |
| C | -0.813370 | 2.332031  | -1.974978 |
| C | -0.587411 | 2.571005  | 0.501029  |
| H | 0.344622  | 0.093376  | -1.798851 |
| H | -6.114590 | 1.388843  | -0.431764 |
| H | -7.393130 | -0.650764 | 0.185743  |
| H | -6.229552 | -2.765146 | 0.729678  |
| H | -3.754566 | -2.904961 | 0.672870  |
| H | -3.463839 | 2.279400  | -0.787766 |
| H | 3.836533  | -2.739181 | -0.135404 |
| H | -0.894341 | -2.156908 | -0.733643 |
| H | -1.061236 | -2.100439 | 1.014110  |
| H | 1.784618  | 2.203458  | -0.331297 |
| H | 2.405329  | 1.121024  | -1.568032 |
| H | 5.324930  | -1.299098 | 1.050872  |
| H | 6.026446  | -1.494398 | -0.554725 |
| H | 4.961389  | 0.734469  | -1.226566 |
| H | 6.087071  | 0.900598  | 0.111366  |
| H | 3.946965  | 2.094911  | 0.636423  |
| H | 4.304120  | 0.802353  | 1.769779  |
| H | 2.942237  | -2.256167 | -2.406938 |
| H | 4.711140  | -2.310562 | -2.431272 |
| H | 3.874153  | -0.748764 | -2.484688 |
| H | -1.053438 | 1.669789  | -2.812360 |
| H | 0.144883  | 2.821505  | -2.181180 |
| H | -1.574593 | 3.117305  | -1.924068 |
| H | -1.500458 | 3.171707  | 0.558421  |
| H | 0.235882  | 3.269321  | 0.326232  |
| H | -0.447437 | 2.093498  | 1.472714  |
| H | 1.444656  | -2.556672 | -0.547721 |
| H | -0.080039 | -0.239207 | 2.282925  |

## Product 2

0 1

|   |           |           |           |
|---|-----------|-----------|-----------|
| C | -0.381757 | 0.587523  | -0.269892 |
| C | 0.910257  | 1.402316  | -0.332063 |
| C | 2.114402  | 0.524834  | -0.192899 |
| C | 2.082911  | -0.839536 | -0.318982 |
| C | 0.872707  | -1.705778 | -0.540796 |
| C | -0.282576 | -0.768160 | -1.013723 |
| C | -1.687420 | -1.411144 | -0.948900 |
| C | -2.630549 | -0.608651 | -0.022575 |
| C | -1.890201 | -0.406406 | 1.314777  |
| N | -0.768953 | 0.324822  | 1.118583  |
| C | 4.236272  | -0.305166 | 0.062241  |
| C | 5.619507  | -0.314536 | 0.273998  |
| C | 6.244631  | 0.909282  | 0.474342  |
| C | 5.514231  | 2.116669  | 0.463631  |
| C | 4.142337  | 2.120652  | 0.252047  |
| C | 3.482532  | 0.896623  | 0.048450  |
| N | 3.360322  | -1.342775 | -0.162523 |
| C | -1.542421 | 1.392832  | -0.874258 |
| N | -2.833959 | 0.705137  | -0.680533 |
| C | -3.851748 | 1.571450  | -0.059239 |
| C | -5.169891 | 0.814156  | 0.103517  |
| C | -4.996974 | -0.492171 | 0.867848  |
| C | -3.946351 | -1.350447 | 0.170217  |
| O | -2.242638 | -0.846482 | 2.409038  |
| C | -4.092834 | 2.805957  | -0.927878 |
| C | 1.133654  | -2.721771 | -1.667879 |
| C | 0.600818  | -2.495366 | 0.759687  |
| H | -0.051847 | -0.515636 | -2.057420 |
| H | -0.116745 | 0.458441  | 1.885235  |
| H | 6.181462  | -1.244091 | 0.281864  |
| H | 7.317309  | 0.937251  | 0.642274  |
| H | 6.037437  | 3.054990  | 0.623122  |
| H | 3.586431  | 3.055028  | 0.244148  |
| H | 3.619403  | -2.318856 | -0.208133 |
| H | -3.507646 | 1.901476  | 0.942872  |
| H | 0.934495  | 1.936877  | -1.291663 |
| H | 0.883494  | 2.176181  | 0.446674  |
| H | -1.648791 | -2.447837 | -0.602570 |
| H | -2.157665 | -1.420540 | -1.937256 |
| H | -1.545491 | 2.363562  | -0.362749 |
| H | -1.352468 | 1.572708  | -1.940125 |
| H | -5.886314 | 1.470845  | 0.610378  |
| H | -5.570874 | 0.605167  | -0.898827 |
| H | -5.948193 | -1.032824 | 0.922302  |
| H | -4.678910 | -0.284849 | 1.896232  |
| H | -4.311860 | -1.643894 | -0.822771 |
| H | -3.747137 | -2.267349 | 0.734753  |
| H | -3.212368 | 3.446172  | -1.022205 |
| H | -4.895793 | 3.408855  | -0.491937 |
| H | -4.400442 | 2.494227  | -1.932604 |
| H | 1.454075  | -2.218635 | -2.585901 |
| H | 0.219954  | -3.286787 | -1.884692 |
| H | 1.904066  | -3.446654 | -1.383908 |
| H | 1.473029  | -3.116935 | 0.989698  |
| H | -0.252949 | -3.171816 | 0.655556  |
| H | 0.424357  | -1.842479 | 1.616631  |

### Substrate **3-oxa-syn**

1 1

|   |           |           |           |
|---|-----------|-----------|-----------|
| C | -0.614527 | 0.237283  | -1.304445 |
| C | -3.217008 | -0.253574 | -0.458409 |
| C | -2.978838 | 0.726914  | -1.541163 |
| N | -1.658551 | 0.891558  | -1.885780 |
| C | -0.886961 | -0.659306 | -0.322073 |
| N | -2.195363 | -0.890097 | 0.065747  |
| C | -2.365886 | -1.912736 | 1.164263  |
| C | -3.784975 | -2.464666 | 1.153509  |
| C | -4.811423 | -1.338659 | 1.181907  |
| C | -4.638575 | -0.471343 | -0.059568 |
| O | -3.887908 | 1.336699  | -2.082350 |
| C | -1.946652 | -1.271985 | 2.485191  |
| H | -1.663743 | -2.706312 | 0.897808  |
| H | -3.928007 | -3.078388 | 0.256519  |
| H | -3.889639 | -3.122845 | 2.020187  |
| H | -4.693596 | -0.733361 | 2.085951  |
| H | -5.824906 | -1.745209 | 1.199533  |
| H | -5.097748 | 0.516616  | 0.051144  |
| H | -5.131705 | -0.925050 | -0.931481 |
| H | -0.896494 | -0.968933 | 2.467695  |
| H | -2.073013 | -2.008070 | 3.283109  |
| H | -2.557267 | -0.395094 | 2.715979  |
| H | -0.114559 | -1.220924 | 0.184957  |
| H | -1.474402 | 1.569002  | -2.624861 |
| N | 3.190737  | 0.394549  | 0.996384  |
| C | -0.324337 | 3.525240  | -0.284787 |
| C | 0.944816  | 3.127335  | -0.196417 |
| C | 0.774139  | 0.521685  | -1.813852 |
| C | 1.846740  | 0.279698  | -0.791438 |
| C | 2.708105  | -0.874237 | -0.787397 |
| C | 2.848538  | -1.990928 | -1.631914 |
| C | 3.807878  | -2.944122 | -1.325844 |
| C | 4.636075  | -2.808186 | -0.190005 |
| C | 4.516985  | -1.719957 | 0.661481  |
| C | 3.542452  | -0.764526 | 0.348958  |
| C | 2.168483  | 1.031204  | 0.323811  |
| C | 1.552212  | 2.289958  | 0.910573  |
| C | 0.516726  | 1.893547  | 1.975101  |
| C | 2.642873  | 3.159973  | 1.572983  |
| H | 3.634270  | 0.737199  | 1.837530  |
| H | -1.079791 | 3.236798  | 0.441791  |
| H | -0.651531 | 4.159110  | -1.104443 |
| H | 1.656447  | 3.451364  | -0.958829 |
| H | 0.795104  | 1.545446  | -2.196234 |
| H | 0.942887  | -0.131022 | -2.680030 |
| H | 2.216281  | -2.110437 | -2.508389 |
| H | 3.926633  | -3.811872 | -1.967843 |
| H | 5.378756  | -3.571624 | 0.021646  |
| H | 5.149919  | -1.613232 | 1.537406  |
| H | 0.981737  | 1.259743  | 2.736813  |
| H | 0.117038  | 2.785945  | 2.468625  |
| H | -0.318405 | 1.340682  | 1.533291  |
| H | 3.075102  | 2.671355  | 2.452745  |
| H | 3.448454  | 3.392213  | 0.869170  |
| H | 2.196646  | 4.099566  | 1.911761  |

### Substrate **3-ox $\beta$ -syn**

I 1

|   |           |           |           |
|---|-----------|-----------|-----------|
| C | -3.020343 | 0.515190  | 1.665661  |
| C | 1.818988  | 0.333673  | 0.781782  |
| C | 2.145266  | 1.121119  | -0.306943 |
| C | 2.698727  | -0.807066 | 0.757123  |
| C | -0.645704 | 0.219419  | 1.293792  |
| C | 3.548691  | -0.651990 | -0.361875 |
| C | -0.898623 | -0.510131 | 0.178540  |
| C | -0.597328 | 3.328300  | 0.155476  |
| C | -2.345669 | -1.635659 | -1.449330 |
| C | 1.526904  | 2.384134  | -0.882527 |
| C | 0.715244  | 3.097322  | 0.179181  |
| C | 0.737114  | 0.524532  | 1.804476  |
| C | -4.710200 | -0.749044 | -1.534289 |
| C | -1.551277 | -2.924670 | -1.249958 |
| C | -3.805439 | -1.950690 | -1.751510 |
| C | -4.643802 | -0.365016 | -0.063899 |
| C | 0.678041  | 2.010241  | -2.108760 |
| O | -3.946928 | 0.956714  | 2.327197  |
| N | -1.703649 | 0.685861  | 2.014589  |
| N | -2.203585 | -0.756096 | -0.219087 |
| N | 3.189932  | 0.520932  | -0.979738 |
| C | 4.540901  | -1.584478 | -0.687345 |
| C | -3.236308 | -0.250693 | 0.416143  |
| C | 3.819284  | -2.876891 | 1.251563  |
| C | 2.842126  | -1.945990 | 1.570545  |
| C | 2.638781  | 3.362910  | -1.320114 |
| C | 4.662272  | -2.696079 | 0.133258  |
| H | -3.844812 | -2.302598 | -2.786019 |
| H | -5.127195 | 0.593780  | 0.147084  |
| H | 1.293653  | 1.501927  | -2.857141 |
| H | 0.257964  | 2.912182  | -2.566436 |
| H | -0.146702 | 1.343240  | -1.839316 |
| H | 3.631331  | 0.887881  | -1.812070 |
| H | 5.185692  | -1.443374 | -1.549633 |
| H | 3.940348  | -3.761602 | 1.869543  |
| H | 2.198502  | -2.100253 | 2.433169  |
| H | 5.418669  | -3.442731 | -0.089480 |
| H | -1.238904 | 2.976785  | -0.648980 |
| H | -1.078365 | 3.879986  | 0.958550  |
| H | 0.729724  | 1.539364  | 2.212000  |
| H | 0.923082  | -0.142429 | 2.656457  |
| H | -1.912991 | -1.031148 | -2.253344 |
| H | 1.303814  | 3.478190  | 1.016401  |
| H | 2.183810  | 4.293712  | -1.672344 |
| H | 3.236719  | 2.959462  | -2.143760 |
| H | 3.308646  | 3.596690  | -0.486593 |
| H | -5.740693 | -0.985795 | -1.807645 |
| H | -4.386285 | 0.092754  | -2.157224 |
| H | -0.471020 | -2.776828 | -1.227008 |
| H | -1.776478 | -3.583388 | -2.092842 |
| H | -1.866535 | -3.425445 | -0.329770 |
| H | -4.134084 | -2.780766 | -1.113019 |
| H | -5.158031 | -1.106257 | 0.564017  |
| H | -1.533882 | 1.225579  | 2.862432  |
| H | -0.105338 | -0.898166 | -0.440890 |

### Substrate 3-ox $\beta$ -anti

1 1

|   |           |           |           |
|---|-----------|-----------|-----------|
| C | -0.529385 | -0.917047 | -0.383022 |
| C | 0.759043  | -1.163204 | -1.122443 |
| C | 1.942433  | -0.392719 | -0.599941 |
| C | 2.126387  | 0.968052  | -0.409759 |
| C | 1.249657  | 2.198865  | -0.601046 |
| C | -0.026841 | 1.867173  | -1.345980 |
| C | -1.262977 | 2.214915  | -0.982314 |
| C | -2.844028 | -0.186157 | 0.943839  |
| C | -1.544711 | -0.075421 | 1.640641  |
| N | -0.464218 | -0.492313 | 0.904577  |
| C | 4.055623  | -0.032882 | 0.228250  |
| C | 5.348542  | -0.310305 | 0.688942  |
| C | 5.738781  | -1.640382 | 0.719598  |
| C | 4.866429  | -2.669118 | 0.301683  |
| C | 3.588524  | -2.384819 | -0.154674 |
| C | 3.165075  | -1.043689 | -0.194993 |
| N | 3.399716  | 1.163758  | 0.085140  |
| C | -1.752159 | -1.079527 | -0.950953 |
| N | -2.892852 | -0.731444 | -0.252953 |
| C | -4.033750 | 0.378602  | 1.644477  |
| O | -1.444202 | 0.361788  | 2.777614  |
| C | 2.007705  | 3.217335  | -1.488435 |
| C | 0.964351  | 2.838720  | 0.768208  |
| H | 0.116915  | 1.365376  | -2.304794 |
| H | 6.015406  | 0.485085  | 1.008244  |
| H | 6.734079  | -1.896061 | 1.070547  |
| H | 5.205801  | -3.699908 | 0.338652  |
| H | 2.932575  | -3.190121 | -0.475096 |
| H | 3.793623  | 2.062080  | 0.330101  |
| H | 0.572821  | -0.978002 | -2.185030 |
| H | 0.984242  | -2.233159 | -1.040163 |
| H | -1.477977 | 2.740941  | -0.055278 |
| H | -2.111517 | 1.989370  | -1.623546 |
| H | -3.694017 | 1.281442  | 2.161210  |
| H | 2.264536  | 2.776253  | -2.456511 |
| H | 1.372167  | 4.091164  | -1.659801 |
| H | 2.930416  | 3.562985  | -1.012058 |
| H | 1.896732  | 3.069757  | 1.291159  |
| H | 0.414918  | 3.776696  | 0.641383  |
| H | 0.372232  | 2.177372  | 1.410802  |
| C | -4.196735 | -0.974058 | -0.992022 |
| H | -4.131159 | -0.310375 | -1.860611 |
| C | -5.176905 | 0.647958  | 0.677767  |
| H | -6.076707 | 0.918547  | 1.234384  |
| H | -4.923454 | 1.491218  | 0.024122  |
| C | -5.408302 | -0.610629 | -0.142285 |
| H | -6.251762 | -0.495362 | -0.828612 |
| H | -5.645461 | -1.447634 | 0.526861  |
| H | -4.336527 | -0.325248 | 2.432478  |
| C | -4.263478 | -2.435708 | -1.428427 |
| H | -4.149263 | -3.094430 | -0.562537 |
| H | -5.252326 | -2.606928 | -1.862040 |
| H | -3.520822 | -2.701501 | -2.181501 |
| H | 0.457706  | -0.376100 | 1.329132  |
| H | -1.877733 | -1.403491 | -1.972439 |

## TS-ox $\alpha$ -syn

1 1

|   |           |           |           |
|---|-----------|-----------|-----------|
| N | 1.360779  | 2.373123  | -0.379573 |
| C | 2.676280  | 2.008306  | -0.481812 |
| O | 3.535686  | 2.707717  | -0.996900 |
| C | 2.937210  | 0.645962  | 0.044154  |
| N | -2.787496 | -1.334119 | -0.710377 |
| C | 2.012997  | -0.275617 | -1.677385 |
| N | 2.114208  | 0.199733  | 1.038982  |
| C | 0.644108  | -0.041813 | -1.664538 |
| C | 0.404605  | 1.503277  | 0.091013  |
| C | -1.039200 | 1.876291  | -0.079849 |
| C | -1.927965 | 0.673581  | -0.213294 |
| C | -3.289236 | 0.627946  | 0.252265  |
| C | -4.123157 | 1.547637  | 0.912630  |
| C | -5.419219 | 1.166843  | 1.226276  |
| C | -5.903093 | -0.116640 | 0.891514  |
| C | -5.102443 | -1.041937 | 0.238141  |
| C | -3.795585 | -0.650166 | -0.076029 |
| C | -1.655690 | -0.546225 | -0.796849 |
| C | -0.419301 | -1.109504 | -1.471508 |
| C | 0.089889  | -2.331695 | -0.694249 |
| C | -0.800573 | -1.556569 | -2.907753 |
| C | 0.812659  | 0.523681  | 0.984825  |
| H | -2.864917 | -2.285629 | -1.043537 |
| H | 2.391100  | -1.266171 | -1.440819 |
| H | 2.638355  | 0.308230  | -2.347866 |
| H | 0.291938  | 0.825426  | -2.224102 |
| H | -1.129211 | 2.537367  | -0.950483 |
| H | -1.350089 | 2.469554  | 0.789424  |
| H | -3.763439 | 2.540061  | 1.172274  |
| H | -6.076117 | 1.865000  | 1.736351  |
| H | -6.923287 | -0.384389 | 1.149947  |
| H | -5.472703 | -2.029337 | -0.021060 |
| H | -0.707993 | -3.069378 | -0.574335 |
| H | 0.909339  | -2.824453 | -1.226228 |
| H | 0.432611  | -2.055569 | 0.306649  |
| H | -1.548952 | -2.354704 | -2.881997 |
| H | -1.209063 | -0.720037 | -3.482366 |
| H | 0.085056  | -1.940178 | -3.422647 |
| C | 4.360847  | 0.184788  | 0.069331  |
| H | 4.838347  | 0.497107  | -0.861742 |
| C | 2.687597  | -0.785664 | 2.013778  |
| H | 3.428651  | -0.205540 | 2.575545  |
| C | 4.503934  | -1.328021 | 0.305991  |
| H | 4.487515  | -1.852566 | -0.653399 |
| H | 5.488012  | -1.509944 | 0.743851  |
| C | 3.399361  | -1.886241 | 1.224328  |
| H | 2.648014  | -2.437662 | 0.648698  |
| H | 3.817214  | -2.592083 | 1.946866  |
| H | 4.862947  | 0.747164  | 0.869664  |
| C | 1.650594  | -1.320391 | 2.984165  |
| H | 1.151433  | -0.520000 | 3.536475  |
| H | 0.900348  | -1.945260 | 2.489902  |
| H | 2.174074  | -1.947463 | 3.709672  |
| H | 1.074752  | 3.221698  | -0.862344 |
| H | 0.100423  | -0.011111 | 1.598729  |

## TS-ox $\beta$ -syn

1 1

|   |           |           |           |
|---|-----------|-----------|-----------|
| C | 2.645427  | 1.101914  | 1.666884  |
| C | -1.963821 | 0.382474  | 0.549866  |
| C | -1.733512 | -0.945709 | 0.254115  |
| C | -3.313166 | 0.679168  | 0.145300  |
| C | 0.393606  | 1.148706  | 0.867381  |
| C | -3.854528 | -0.509845 | -0.393786 |
| C | 0.822253  | 0.885937  | -0.421424 |
| C | 1.910032  | -1.398121 | 1.184940  |
| C | 2.531605  | 0.315054  | -2.076909 |
| C | -0.524499 | -1.843611 | 0.435553  |
| C | 0.542311  | -1.162736 | 1.273384  |
| C | -1.051663 | 1.385247  | 1.197716  |
| C | 4.586218  | -0.762844 | -1.102739 |
| C | 2.028630  | 1.418501  | -3.001492 |
| C | 4.041568  | 0.153846  | -2.187576 |
| C | 4.338062  | -0.104217 | 0.245202  |
| C | -0.022450 | -2.325479 | -0.933825 |
| O | 3.498085  | 1.298234  | 2.518370  |
| N | 1.345522  | 1.511949  | 1.789669  |
| N | 2.119953  | 0.613235  | -0.656877 |
| N | -2.878123 | -1.472097 | -0.312742 |
| C | -5.161037 | -0.580648 | -0.891658 |
| C | 2.907644  | 0.322066  | 0.424602  |
| C | -5.405905 | 1.774035  | -0.299626 |
| C | -4.110551 | 1.836587  | 0.191388  |
| C | -0.942500 | -3.084062 | 1.270921  |
| C | -5.925254 | 0.575570  | -0.835936 |
| H | 4.246686  | -0.242134 | -3.186095 |
| H | 4.602474  | -0.753669 | 1.084590  |
| H | -0.808412 | -2.886105 | -1.447574 |
| H | 0.835659  | -2.995697 | -0.829851 |
| H | 0.255618  | -1.489960 | -1.581774 |
| H | -2.982988 | -2.420359 | -0.647028 |
| H | -5.558312 | -1.504022 | -1.302508 |
| H | -6.034684 | 2.658877  | -0.271621 |
| H | -3.724104 | 2.764472  | 0.605333  |
| H | -6.944026 | 0.558486  | -1.211501 |
| H | 2.296411  | -2.053680 | 0.408612  |
| H | 2.495301  | -1.376022 | 2.100480  |
| H | -1.167150 | 1.381898  | 2.288374  |
| H | -1.320878 | 2.395615  | 0.864474  |
| H | 2.054936  | -0.640001 | -2.328118 |
| H | 0.173050  | -0.815274 | 2.239144  |
| H | -0.075850 | -3.733605 | 1.424946  |
| H | -1.710912 | -3.663550 | 0.750386  |
| H | -1.337883 | -2.785177 | 2.246106  |
| H | 5.658347  | -0.926884 | -1.235329 |
| H | 4.098430  | -1.744257 | -1.155967 |
| H | 0.940356  | 1.465943  | -3.069218 |
| H | 2.410170  | 1.218057  | -4.006166 |
| H | 2.409387  | 2.390208  | -2.673221 |
| H | 4.519944  | 1.139796  | -2.120844 |
| H | 4.962174  | 0.793414  | 0.348182  |
| H | 1.061809  | 1.900217  | 2.686145  |
| H | 0.117488  | 0.834927  | -1.240957 |

## TS-ox $\beta$ -anti

1 1

|   |           |           |           |
|---|-----------|-----------|-----------|
| C | -0.391625 | -1.029075 | 0.217560  |
| C | 0.946037  | -1.605762 | -0.119853 |
| C | 2.034481  | -0.577342 | -0.179927 |
| C | 1.942621  | 0.773127  | -0.427723 |
| C | 0.774026  | 1.708542  | -0.680006 |
| C | -0.510452 | 1.001257  | -1.102571 |
| C | -1.768704 | 1.482873  | -0.737014 |
| C | -2.706932 | 0.262638  | 0.623029  |
| C | -1.666691 | 0.348428  | 1.693633  |
| N | -0.540926 | -0.372500 | 1.420601  |
| C | 4.139797  | 0.327149  | -0.123179 |
| C | 5.532197  | 0.395381  | 0.006597  |
| C | 6.203010  | -0.788138 | 0.278973  |
| C | 5.510596  | -2.010558 | 0.418824  |
| C | 4.131056  | -2.070344 | 0.288078  |
| C | 3.427187  | -0.884710 | 0.014684  |
| N | 3.218058  | 1.309306  | -0.389922 |
| C | -1.537185 | -1.436071 | -0.435662 |
| N | -2.726959 | -0.897058 | -0.115532 |
| C | -3.996563 | 0.958184  | 0.972127  |
| O | -1.797883 | 1.048889  | 2.686244  |
| C | 1.110168  | 2.592924  | -1.914780 |
| C | 0.594407  | 2.639434  | 0.536547  |
| H | -0.425462 | 0.427279  | -2.022827 |
| H | 6.063766  | 1.336155  | -0.101992 |
| H | 7.283589  | -0.774104 | 0.386155  |
| H | 6.070804  | -2.916324 | 0.630611  |
| H | 3.608149  | -3.017632 | 0.393262  |
| H | 3.448297  | 2.284137  | -0.523171 |
| H | 0.857266  | -2.151095 | -1.065941 |
| H | 1.195477  | -2.352208 | 0.646991  |
| H | -1.829751 | 2.379173  | -0.125800 |
| H | -2.576995 | 1.363374  | -1.453926 |
| H | -3.773960 | 2.013601  | 1.147517  |
| H | 1.356109  | 1.978988  | -2.785862 |
| H | 0.253747  | 3.227685  | -2.158532 |
| H | 1.957345  | 3.252305  | -1.702296 |
| H | 1.561322  | 3.065960  | 0.816903  |
| H | -0.069333 | 3.474793  | 0.295505  |
| H | 0.197214  | 2.121857  | 1.413646  |
| C | -3.923059 | -1.316622 | -0.930911 |
| H | -3.748928 | -0.902035 | -1.932688 |
| C | -5.079107 | 0.756822  | -0.077031 |
| H | -6.023404 | 1.161113  | 0.296019  |
| H | -4.838850 | 1.300105  | -0.998890 |
| C | -5.208164 | -0.732499 | -0.358676 |
| H | -6.000781 | -0.931312 | -1.085483 |
| H | -5.469057 | -1.267129 | 0.564052  |
| H | -4.328471 | 0.553159  | 1.937553  |
| C | -4.002372 | -2.838643 | -0.994481 |
| H | -4.036772 | -3.258087 | 0.015391  |
| H | -4.926624 | -3.107400 | -1.512596 |
| H | -3.177733 | -3.296625 | -1.542964 |
| H | 0.265666  | -0.248365 | 2.028991  |
| H | -1.489160 | -2.128691 | -1.265037 |



## NADP<sup>+</sup> Model

I 1

|   |           |           |           |
|---|-----------|-----------|-----------|
| C | 2.790063  | -1.392824 | 0.158797  |
| N | 1.705279  | -0.391857 | 0.053557  |
| C | 0.421878  | -0.781114 | 0.056584  |
| C | -0.603546 | 0.149820  | -0.025245 |
| C | -0.278816 | 1.499882  | -0.133451 |
| C | 1.061863  | 1.881738  | -0.145606 |
| C | 2.039401  | 0.913533  | -0.045207 |
| C | -2.007053 | -0.404586 | -0.034389 |
| N | -2.985189 | 0.434961  | 0.347536  |
| O | -2.199639 | -1.560682 | -0.393977 |
| H | 0.219375  | -1.843532 | 0.123012  |
| H | -1.050201 | 2.257244  | -0.230332 |
| H | 1.351904  | 2.921105  | -0.235254 |
| H | 3.099418  | 1.138415  | -0.043286 |
| H | -3.933108 | 0.079769  | 0.380652  |
| H | -2.807902 | 1.316283  | 0.809492  |
| H | 2.346753  | -2.383747 | 0.217120  |
| H | 3.420956  | -1.315322 | -0.725881 |
| H | 3.366557  | -1.185181 | 1.059742  |

## NADPH Model

0 1

|   |           |           |           |
|---|-----------|-----------|-----------|
| C | 2.804645  | -1.420812 | 0.046659  |
| N | 1.737492  | -0.438670 | -0.066344 |
| C | 0.424910  | -0.795876 | -0.034847 |
| C | -0.601348 | 0.090465  | -0.008902 |
| C | -0.368709 | 1.590423  | -0.004480 |
| C | 1.113469  | 1.880448  | 0.020453  |
| C | 2.048215  | 0.923566  | -0.010146 |
| C | -1.961838 | -0.473088 | 0.003684  |
| N | -2.977515 | 0.430043  | 0.022826  |
| O | -2.204118 | -1.690726 | 0.003519  |
| H | 0.218394  | -1.861939 | -0.037528 |
| H | -0.823865 | 2.065153  | -0.888780 |
| H | 1.436491  | 2.915861  | 0.056101  |
| H | 3.110202  | 1.146716  | 0.002971  |
| H | -3.929717 | 0.090575  | 0.010576  |
| H | -2.832420 | 1.428218  | -0.012397 |
| H | 2.405103  | -2.408712 | -0.185188 |
| H | 3.599379  | -1.188959 | -0.666868 |
| H | 3.225411  | -1.434775 | 1.058130  |
| H | -0.851952 | 2.063304  | 0.864925  |

## Substrate 4

0 1

|   |           |           |           |
|---|-----------|-----------|-----------|
| N | -1.653566 | -1.443146 | -1.806768 |
| C | -2.974416 | -1.335511 | -1.516315 |
| O | -3.863219 | -1.895274 | -2.195457 |
| C | -3.379938 | -0.528575 | -0.354653 |
| N | 3.224166  | 0.526881  | 0.844709  |
| C | 3.680073  | -2.739551 | -1.185734 |
| N | -2.452993 | 0.129521  | 0.328734  |
| C | 3.219104  | -2.958944 | 0.045106  |
| C | -0.763580 | -0.798956 | -1.042950 |
| C | 0.696335  | -0.980887 | -1.412691 |
| C | 1.664462  | -0.163215 | -0.613394 |
| C | 1.867801  | 1.249866  | -0.786884 |
| C | 1.295475  | 2.214793  | -1.635757 |
| C | 1.721676  | 3.531002  | -1.535107 |
| C | 2.711499  | 3.906894  | -0.599910 |
| C | 3.290239  | 2.976094  | 0.251309  |
| C | 2.854098  | 1.649673  | 0.145274  |
| C | 2.506527  | -0.567940 | 0.401165  |
| C | 2.686444  | -1.933632 | 1.032258  |
| C | 3.682696  | -1.880065 | 2.206715  |
| C | 1.331788  | -2.423128 | 1.588084  |
| C | -1.126610 | -0.003219 | 0.021925  |
| H | 3.913169  | 0.509447  | 1.583500  |
| H | 3.677444  | -1.747703 | -1.632196 |
| H | 4.068947  | -3.555903 | -1.787388 |
| H | 3.239554  | -3.974623 | 0.445496  |
| H | 0.787614  | -0.726848 | -2.477719 |
| H | 0.932398  | -2.048263 | -1.344642 |
| H | 0.528515  | 1.933406  | -2.354220 |
| H | 1.289436  | 4.288487  | -2.182471 |
| H | 3.024376  | 4.945443  | -0.544784 |
| H | 4.049535  | 3.263785  | 0.972719  |
| H | 3.324518  | -1.212678 | 2.998926  |
| H | 3.788677  | -2.879586 | 2.639224  |
| H | 4.676555  | -1.556026 | 1.880236  |
| H | 0.951811  | -1.714061 | 2.331314  |
| H | 0.580146  | -2.528729 | 0.801248  |
| H | 1.458307  | -3.397962 | 2.072151  |
| C | -4.826315 | -0.519207 | 0.025387  |
| H | -5.371037 | 0.117244  | -0.686448 |
| C | -2.774861 | 1.053792  | 1.480893  |
| H | -2.375200 | 0.539455  | 2.361469  |
| C | -5.046279 | -0.040126 | 1.452257  |
| H | -6.112736 | 0.110556  | 1.638453  |
| H | -4.690775 | -0.796087 | 2.163336  |
| C | -4.276837 | 1.257081  | 1.639300  |
| H | -4.620604 | 1.997977  | 0.904986  |
| H | -4.439055 | 1.686134  | 2.632424  |
| H | -5.200256 | -1.534173 | -0.139497 |
| C | -2.076443 | 2.398421  | 1.284264  |
| H | -0.990263 | 2.345173  | 1.375399  |
| H | -2.331534 | 2.816475  | 0.305239  |
| H | -2.440568 | 3.083123  | 2.055296  |
| H | -0.414112 | 0.517378  | 0.641646  |

## Substrate 9

0 1

|   |           |           |           |
|---|-----------|-----------|-----------|
| N | -2.174768 | -0.794634 | -1.699387 |
| C | -3.479053 | -0.638782 | -1.330516 |
| O | -4.439116 | -0.993530 | -2.048699 |
| C | -3.723065 | -0.027350 | -0.036473 |
| N | 3.039611  | 0.251152  | 0.841516  |
| C | 3.014969  | -2.664727 | -1.679730 |
| N | -2.701278 | 0.365695  | 0.703932  |
| C | 2.600086  | -3.036108 | -0.469125 |
| C | -1.185127 | -0.376414 | -0.902387 |
| C | 0.224019  | -0.609766 | -1.413295 |
| C | 1.320114  | -0.031563 | -0.571604 |
| C | 1.683556  | 1.359762  | -0.557268 |
| C | 1.188548  | 2.498558  | -1.218360 |
| C | 1.782175  | 3.727244  | -0.969221 |
| C | 2.864795  | 3.844393  | -0.069461 |
| C | 3.371662  | 2.737939  | 0.597211  |
| C | 2.767316  | 1.501031  | 0.341175  |
| C | 2.169263  | -0.677375 | 0.302921  |
| C | 2.233445  | -2.138059 | 0.701038  |
| C | 3.291920  | -2.373192 | 1.796103  |
| C | 0.866458  | -2.578783 | 1.266501  |
| C | -1.406805 | 0.225986  | 0.327607  |
| H | 3.763545  | 0.046527  | 1.515891  |
| H | 3.093912  | -1.617797 | -1.964210 |
| H | 3.282285  | -3.405786 | -2.427402 |
| H | 2.534213  | -4.100567 | -0.234661 |
| H | 0.269647  | -0.182732 | -2.424270 |
| H | 0.358563  | -1.689014 | -1.544756 |
| H | 0.352354  | 2.416871  | -1.909326 |
| H | 1.411550  | 4.616405  | -1.470899 |
| H | 3.308397  | 4.820259  | 0.104957  |
| H | 4.203333  | 2.826786  | 1.290196  |
| H | 3.053937  | -1.807845 | 2.704398  |
| H | 3.310007  | -3.434443 | 2.061982  |
| H | 4.296405  | -2.103923 | 1.452821  |
| H | 0.603268  | -1.966991 | 2.135930  |
| H | 0.067084  | -2.483650 | 0.526833  |
| H | 0.914881  | -3.626859 | 1.582310  |
| H | -0.636492 | 0.575763  | 1.000905  |
| C | -3.142864 | 1.028586  | 1.957634  |
| C | -4.608184 | 0.593662  | 2.071577  |
| C | -5.028695 | 0.279279  | 0.621431  |
| H | -3.023786 | 2.105445  | 1.811898  |
| H | -2.505167 | 0.700021  | 2.778495  |
| H | -5.220880 | 1.369098  | 2.531872  |
| H | -4.676883 | -0.310205 | 2.681887  |
| H | -5.723034 | -0.560388 | 0.541614  |
| H | -5.496351 | 1.139855  | 0.126150  |

## Substrate 9-red

0 1

|   |           |           |           |
|---|-----------|-----------|-----------|
| N | -2.214608 | -0.574435 | -1.688337 |
| C | -3.508914 | -0.646115 | -1.272715 |
| O | -4.436927 | -0.943849 | -2.019499 |
| C | -3.670206 | -0.378290 | 0.211961  |
| N | 3.113313  | 0.158812  | 0.850912  |
| C | 2.938336  | -2.739603 | -1.666171 |
| N | -2.751139 | 0.681541  | 0.606993  |
| C | 2.516116  | -3.096380 | -0.453663 |
| C | -1.128125 | -0.209988 | -0.853350 |
| C | 0.238801  | -0.559956 | -1.379389 |
| C | 1.365474  | -0.034940 | -0.541591 |
| C | 1.802898  | 1.334712  | -0.536295 |
| C | 1.367493  | 2.495596  | -1.200769 |
| C | 2.033020  | 3.689896  | -0.966833 |
| C | 3.128776  | 3.751615  | -0.077151 |
| C | 3.578017  | 2.622377  | 0.592482  |
| C | 2.902903  | 1.419841  | 0.349195  |
| C | 2.189019  | -0.723723 | 0.323971  |
| C | 2.188261  | -2.186676 | 0.719048  |
| C | 3.235994  | -2.470679 | 1.813151  |
| C | 0.804209  | -2.570184 | 1.284287  |
| C | -1.413681 | 0.426002  | 0.294738  |
| H | 3.831243  | -0.082059 | 1.519441  |
| H | 3.054870  | -1.696015 | -1.950155 |
| H | 3.174255  | -3.489381 | -2.415730 |
| H | 2.412208  | -4.157999 | -0.219905 |
| H | 0.334270  | -0.150414 | -2.397767 |
| H | 0.318042  | -1.648403 | -1.492803 |
| H | 0.519640  | 2.456076  | -1.881125 |
| H | 1.708927  | 4.595390  | -1.471621 |
| H | 3.628523  | 4.701893  | 0.086411  |
| H | 4.420245  | 2.667159  | 1.277000  |
| H | 3.025763  | -1.893321 | 2.720707  |
| H | 3.203368  | -3.531248 | 2.080517  |
| H | 4.252311  | -2.250299 | 1.469529  |
| H | 0.576106  | -1.960329 | 2.165044  |
| H | 0.006313  | -2.420104 | 0.552401  |
| H | 0.804020  | -3.624383 | 1.583279  |
| H | -3.406578 | -1.321845 | 0.736951  |
| H | -2.030489 | -0.835975 | -2.651949 |
| H | -0.639317 | 0.780754  | 0.967025  |
| C | -3.149632 | 1.065048  | 1.955465  |
| C | -4.686918 | 1.079456  | 1.864110  |
| C | -5.032922 | 0.129805  | 0.683705  |
| H | -2.718238 | 2.031600  | 2.227335  |
| H | -2.810573 | 0.311144  | 2.686440  |
| H | -5.044978 | 2.090485  | 1.655468  |
| H | -5.139660 | 0.753189  | 2.802801  |
| H | -5.683349 | -0.694738 | 0.981367  |
| H | -5.527975 | 0.671309  | -0.126761 |

## Supplementary References

1. Holm, L. & Rosenström, P. Dali server: conservation mapping in 3D. *Nucleic Acids Res.* **38**, W545-W549 (2010).
2. Ding, Y., Greshock, T.J., Miller, K.A., Sherman, D.H. & Williams, R.M. Premalbrancheamide: synthesis, isotopic labeling, biosynthetic incorporation, and detection in cultures of *Malbranchea aurantiaca*. *Org. Lett.* **10**, 4863-4866 (2008).
